# Supplementary material for: Preparation and properties of multifunctional phenoxyacetate-based ionic liquids and their application in citrus bacteriostatic preservation
Source: Royal Society of Chemistry journal article supplement (doi:10.1039/d2nj03461a), 2022-01-01
Supplement: d2nj03461a1.pdf [file d2nj03461a1.pdf]

Supporting Information

**Preparation and properties of multifunctional phenoxyacetate-based ionic liquids and their application in citrus bacteriostatic preservation**

Yifei Zhou, Qiuxiao Wang, Tao Wang, Haixiang Gao\*

Department of Applied Chemistry, China Agricultural University

Yuanmingyuan West Road 2#, Haidian, Beijing, 100193, Peop. Rep. China.

E-mail: hxgao@cau.edu.cn

**Table S1.** Solubility of water at different pH

| Compound                | Solubility of water at different pH (mg/L) |                  |                  |
|-------------------------|--------------------------------------------|------------------|------------------|
|                         | 5.0                                        | 7.0              | 9.0              |
| <b>Free acid sodium</b> | >10 <sup>5</sup>                           | >10 <sup>5</sup> | >10 <sup>5</sup> |
| <b>2,4-D</b>            | 407.90                                     | 870.29           | 1117.39          |
| <b>DIL-1</b>            | 2962.11                                    | 2037.55          | 1850.94          |
| <b>DIL-2</b>            | 3878.48                                    | 2757.12          | 1953.97          |
| <b>DIL-3</b>            | 238.55                                     | 232.39           | 238.69           |
| <b>4-CPA</b>            | 402.83                                     | 982.20           | 1301.74          |
| <b>CIL-1</b>            | 1230.18                                    | 1233.65          | 1366.50          |
| <b>CIL-2</b>            | 3348.28                                    | 3217.76          | 2190.85          |
| <b>CIL-3</b>            | 74.16                                      | 251.43           | 206.90           |
| <b>MCPA</b>             | 321.68                                     | 894.87           | 1071.56          |
| <b>MIL-1</b>            | 2676.98                                    | 1848.48          | 1909.03          |
| <b>MIL-2</b>            | 1380.52                                    | 1047.74          | 836.50           |
| <b>MIL-3</b>            | 31.45                                      | 202.72           | 157.64           |
| <b>PAA</b>              | 4540.87                                    | 5853.71          | 5867.12          |
| <b>PIL-1</b>            | 2107.86                                    | 2087.39          | 1991.93          |
| <b>PIL-2</b>            | 5195.92                                    | 4464.82          | 7069.45          |
| <b>PIL-3</b>            | 1030.23                                    | 468.73           | 758.63           |

**Table S2.** Fungicidal Activities of free acids and alkaloids and fungicides against different fungi

| Fungi                  | 2,4-D  | 4-CPA  | MCPA   | PAA    | PAL    | GRA    | PYR    | PRO    |
|------------------------|--------|--------|--------|--------|--------|--------|--------|--------|
| <b>Pythium</b>         | -1.95% | 2.92%  | 5.11%  | 10.22% | 1.53%  | 1.75%  | 5.68%  | 96.94% |
| <b>Rhizoctonia</b>     | 0.44%  | -0.65% | 0.22%  | 4.14%  | 29.91% | 1.34%  | 59.15% | 0.22%  |
| <b>Phytophthora</b>    | 8.26%  | 4.59%  | 15.37% | -0.69% | 78.04% | -1.67% | 99.05% | 31.26% |
| <b>S. Sorauer</b>      | 14.25% | 2.57%  | 11.45% | 5.14%  | 41.84% | 27.19% | 83.69% | 6.38%  |
| <b>Cytospora sp.</b>   | -0.23% | -3.20% | 7.31%  | -1.83% | 0.68%  | -1.37% | 19.18% | -1.14% |
| <b>B. cinerea</b>      | 0.24%  | 5.67%  | 6.86%  | -4.02% | 6.56%  | 1.09%  | 84.90% | 0.66%  |
| <b>S. sclerotiorum</b> | -1.44% | 4.09%  | 5.29%  | -5.77% | 5.44%  | 3.07%  | 75.89% | 0.71%  |
| <b>F. graminearum</b>  | 0.89%  | 1.33%  | 0.67%  | -1.11% | 30.67% | 10.67% | 24.00% | 6.67%  |
| <b>P. citrinum</b>     | 1.19%  | 1.43%  | 1.43%  | 2.39%  | 7.16%  | 3.10%  | 85.20% | 0.24%  |

**Table S3.** Fungicidal Activities of the PILs against different fungi

|              | <b>Pythium</b> | <b>Rhizoctonia</b> | <b>Phytophthora</b> | <b>S. Sorauer</b> | <b>Cytospora sp.</b> | <b>B. cinerea</b> | <b>S. sclerotiorum</b> | <b>F. graminearum</b> | <b>P. citrinum</b> |
|--------------|----------------|--------------------|---------------------|-------------------|----------------------|-------------------|------------------------|-----------------------|--------------------|
| <b>DIL-1</b> | 8.81%          | 28.32%             | 72.99%              | 34.93%            | 29.33%               | 10.27%            | 7.28%                  | 64.47%                | 17.97%             |
| <b>DIL-2</b> | 7.49%          | 13.27%             | 7.11%               | 65.07%            | 17.07%               | 28.35%            | 3.75%                  | 46.27%                | 13.00%             |
| <b>DIL-3</b> | 11.89%         | 63.05%             | 97.63%              | 94.06%            | 59.62%               | 78.35%            | 99.12%                 | 59.87%                | 88.18%             |
| <b>DIL-4</b> | 98.90%         | 15.27%             | 51.42%              | 25.57%            | 10.10%               | 17.19%            | 6.18%                  | 50.00%                | 9.22%              |
| <b>CIL-1</b> | 7.05%          | 26.55%             | 69.67%              | 43.38%            | 18.27%               | 10.94%            | 3.75%                  | 58.99%                | 17.97%             |
| <b>CIL-2</b> | 5.73%          | 15.93%             | 3.79%               | 9.82%             | 10.82%               | 23.88%            | 2.43%                  | 32.46%                | 52.72%             |
| <b>CIL-3</b> | 10.13%         | 48.78%             | 97.39%              | 91.57%            | 34.16%               | 91.19%            | 98.21%                 | 52.41%                | 85.82%             |
| <b>CIL-4</b> | 98.24%         | 73.89%             | 76.78%              | 96.35%            | 73.80%               | 95.98%            | 91.61%                 | 49.12%                | 10.64%             |
| <b>MIL-1</b> | 5.73%          | 25.44%             | 71.09%              | 34.70%            | 41.83%               | 20.76%            | 20.97%                 | 59.87%                | 32.05%             |
| <b>MIL-2</b> | 11.45%         | 6.26%              | 0.24%               | 31.15%            | 18.74%               | 33.48%            | 10.76%                 | 36.67%                | 13.49%             |
| <b>MIL-3</b> | 14.98%         | 99.57%             | 98.10%              | 88.52%            | 62.98%               | 91.19%            | 96.41%                 | 52.89%                | 85.54%             |
| <b>MIL-4</b> | 96.48%         | 4.97%              | 22.99%              | 25.53%            | 14.45%               | 27.97%            | 63.90%                 | 36.89%                | 12.29%             |
| <b>PIL-1</b> | 5.51%          | 25.27%             | 71.56%              | 33.96%            | 19.41%               | -0.44%            | 13.68%                 | 51.56%                | 20.72%             |
| <b>PIL-2</b> | 9.25%          | 7.99%              | -5.92%              | 13.11%            | 1.13%                | 1.32%             | 9.19%                  | 38.67%                | 14.22%             |
| <b>PIL-3</b> | 12.33%         | 98.70%             | 99.05%              | 93.44%            | 33.18%               | 55.29%            | 90.81%                 | 41.78%                | 87.95%             |
| <b>PIL-4</b> | 94.49%         | 6.26%              | 15.17%              | 16.39%            | 2.48%                | 3.74%             | 76.46%                 | 37.11%                | 9.88%              |

**Table S4.** Efficacy test of DIL-3 on citrus

|              | Incidence (%) | Disease index (%) | Relative control effect (%) |
|--------------|---------------|-------------------|-----------------------------|
| <b>DIL-3</b> | 10%           | 2.5%              | 88.89%                      |
| <b>2,4-D</b> | 30%           | 22.5%             | 62.5%                       |
| <b>CK</b>    | 80%           | 60.0%             |                             |

**Table S5.** Standard curves of ionic liquids

|              | Standard curve         | R <sup>2</sup> |
|--------------|------------------------|----------------|
| <b>2,4-D</b> | $y = 0.0354x + 0.0922$ | 0.9967         |
| <b>DIL-1</b> | $y = 0.0496x - 0.0372$ | 0.9996         |
| <b>DIL-2</b> | $y = 0.0216x - 0.0324$ | 0.9999         |
| <b>DIL-3</b> | $y = 0.0179x - 0.0118$ | 0.9993         |
| <b>DIL-4</b> | $y = 0.0239x + 0.0179$ | 0.9998         |
| <b>4-CPA</b> | $y = 0.0432x + 0.1997$ | 0.9957         |
| <b>CIL-1</b> | $y = 0.0587x - 0.0331$ | 0.9995         |
| <b>CIL-2</b> | $y = 0.0356x + 0.2239$ | 0.9911         |
| <b>CIL-3</b> | $y = 0.0183x + 0.0118$ | 0.9987         |
| <b>CIL-4</b> | $y = 0.0292x + 0.0742$ | 0.9945         |
| <b>MCPA</b>  | $y = 0.0437x + 0.0333$ | 0.9977         |
| <b>MIL-1</b> | $y = 0.0612x - 0.0159$ | 0.9999         |
| <b>MIL-2</b> | $y = 0.0395x - 0.0748$ | 0.9957         |
| <b>MIL-3</b> | $y = 0.0395x - 0.0748$ | 0.9999         |
| <b>MIL-4</b> | $y = 0.0281x + 0.0724$ | 0.9989         |
| <b>PAA</b>   | $y = 0.0379x + 0.1289$ | 0.9981         |
| <b>PIL-1</b> | $y = 0.0796x - 0.0241$ | 0.9997         |
| <b>PIL-2</b> | $y = 0.051x + 0.1768$  | 0.9932         |
| <b>PIL-3</b> | $y = 0.1087x + 0.0507$ | 0.9995         |
| <b>PIL-4</b> | $y = 0.0204x + 0.0774$ | 0.9997         |

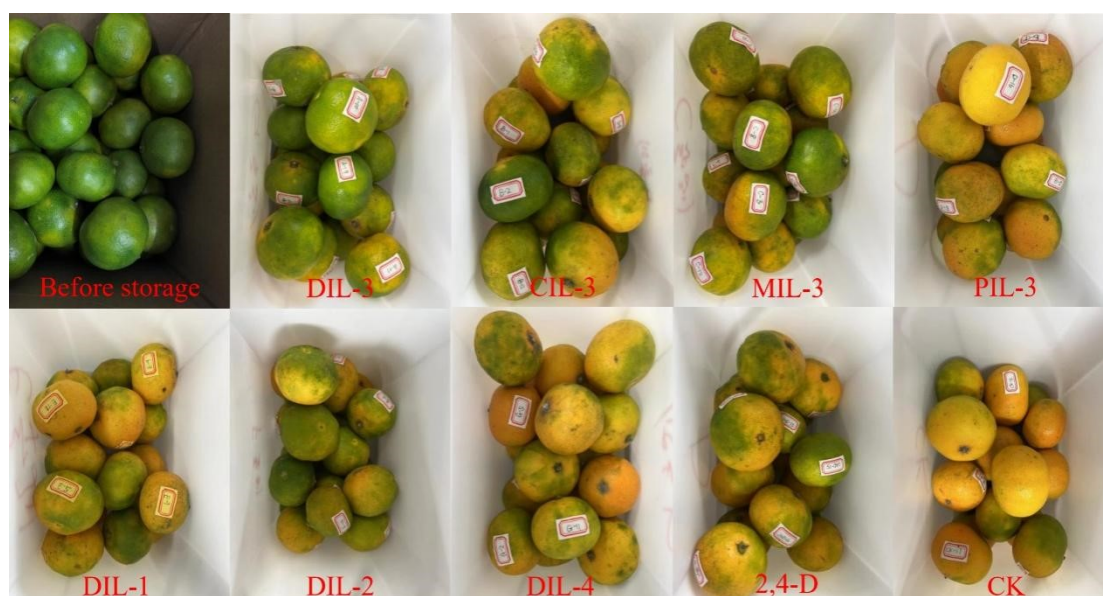

**Figure S1.** Comparison photos of citrus after 20 days of storage and before storage.

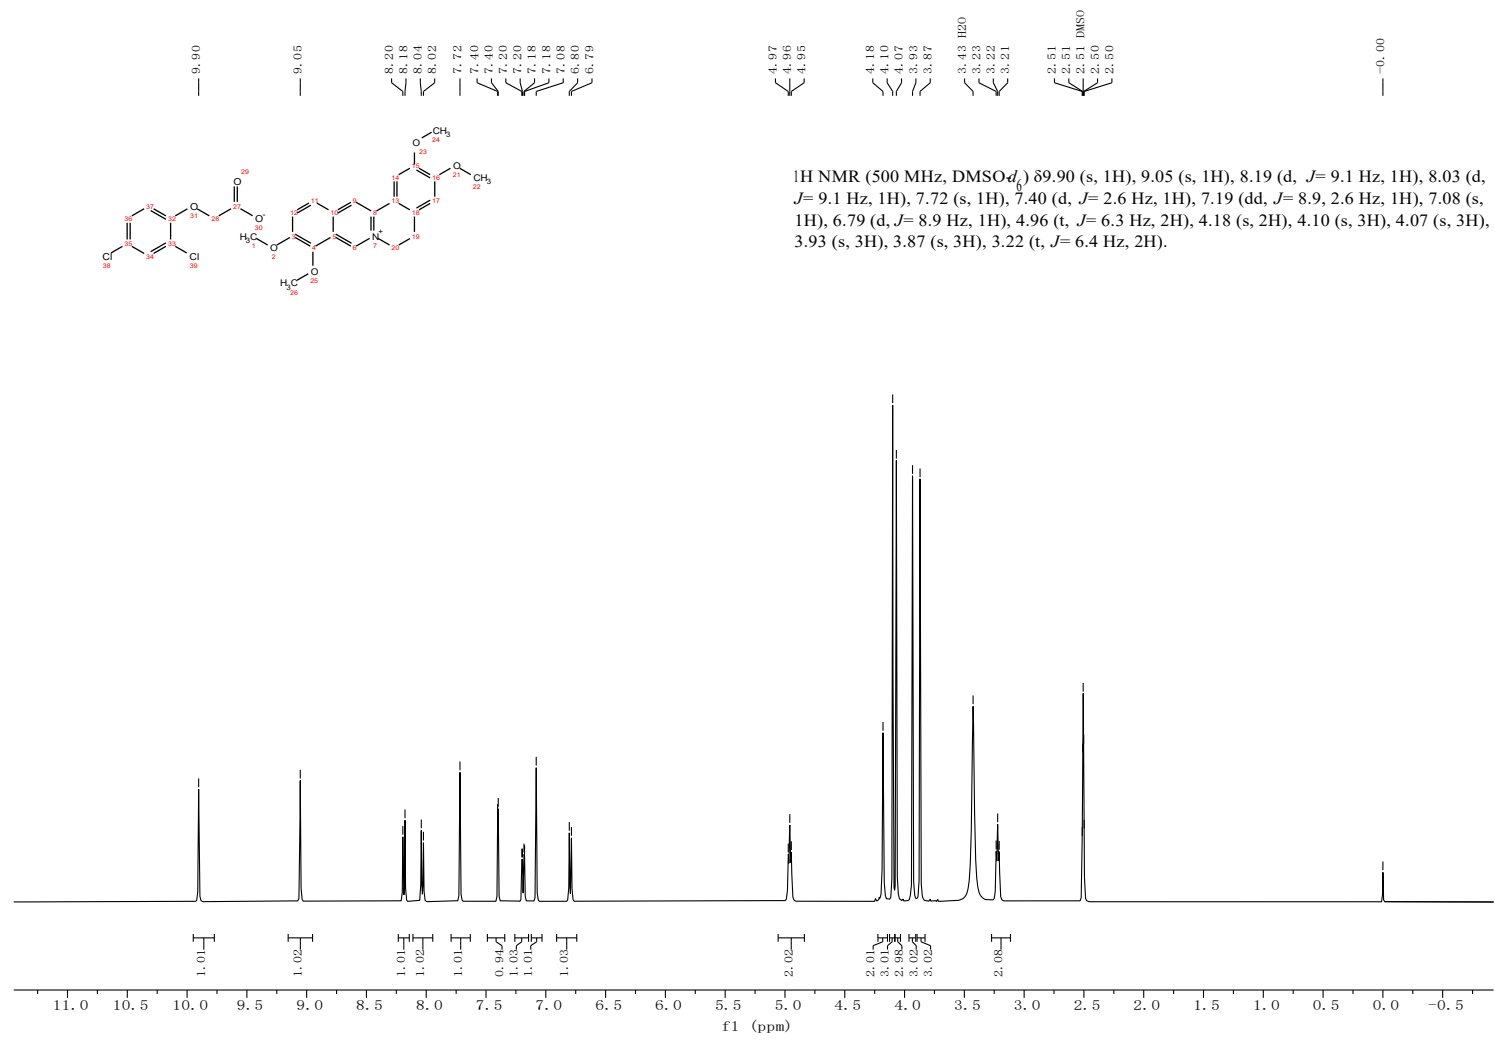

Fig. S2 <sup>1</sup>H NMR (500 MHz; DMSO-d<sub>6</sub>; Me<sub>4</sub>Si) of DIL-1 (2-(2,4-dichlorophenoxy)acetate 2,3,9,10-tetramethoxy-5,6-dihydroisoquinolino[3,2-a]isoquinolin-7-ium)

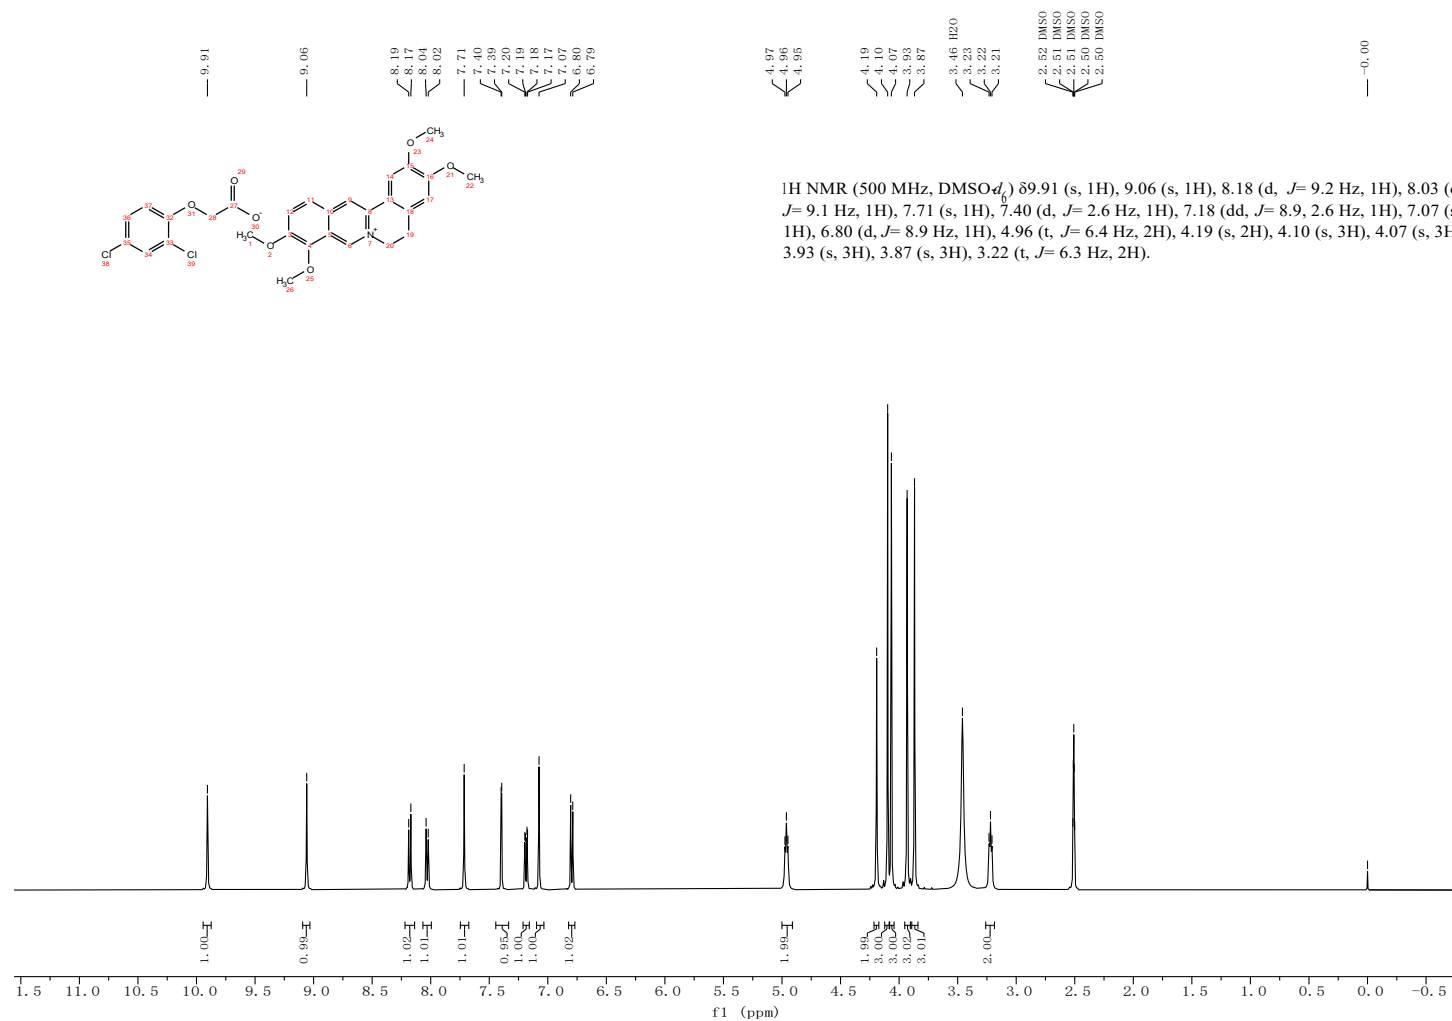

Fig. S3  $^1\text{H NMR}$  (500 MHz;  $\text{DMSO-}d_6$ ;  $\text{Me}_4\text{Si}$ ) of DIL-1 after volatility test

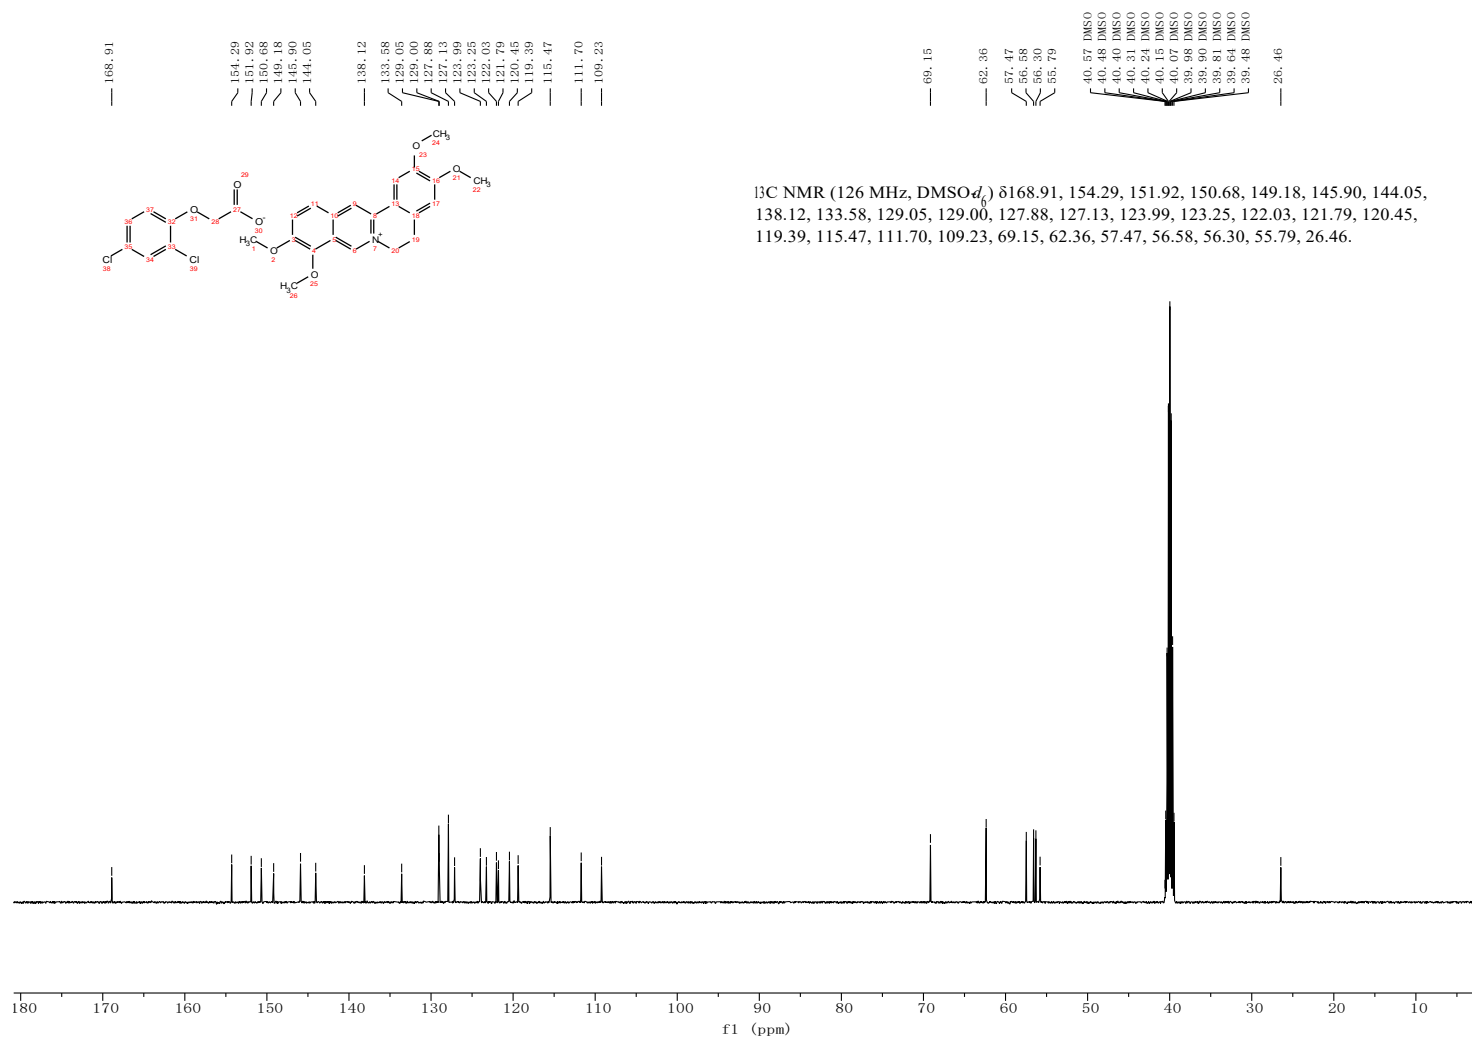

Fig. S4  $^{13}\text{C}$  NMR (126 MHz;  $\text{DMSO}-d_6$ ;  $\text{Me}_4\text{Si}$ ) of DIL-1 (2-(2,4-dichlorophenoxy)acetate 2,3,9,10-tetramethoxy-5,6-dihydroisoquinolino[3,2-a]isoquinolin-7-ium)

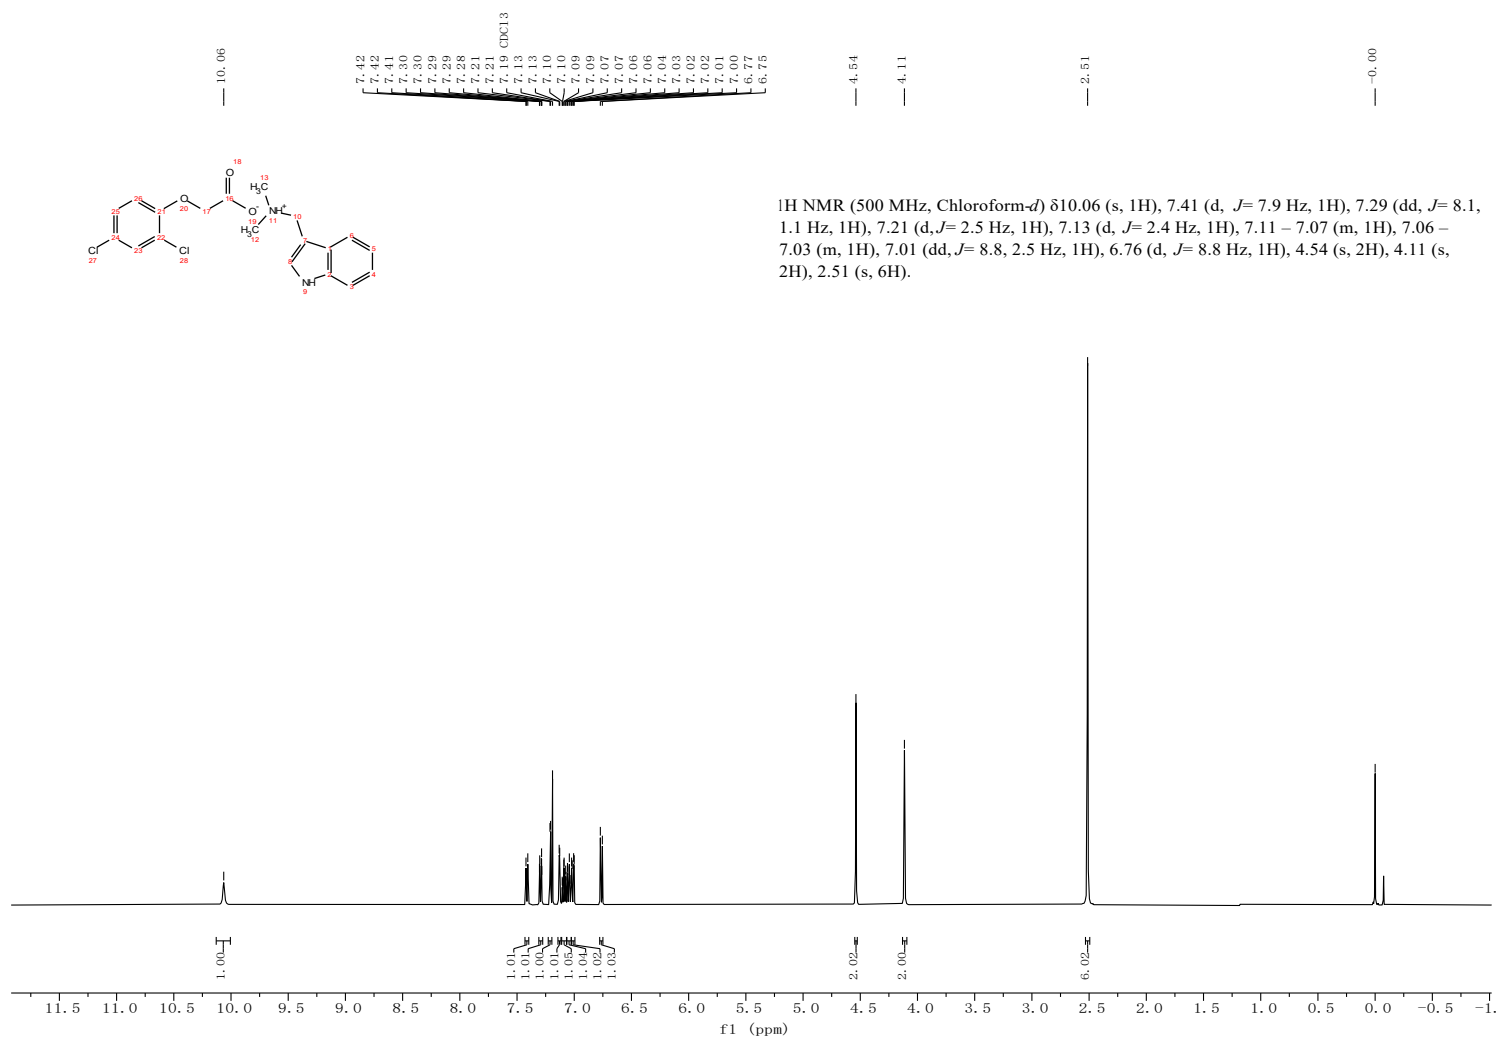

Fig. S5 <sup>1</sup>H NMR (500 MHz; CDCl<sub>3</sub>; Me<sub>4</sub>Si) of DIL-2 (2-(2,4-dichlorophenoxy)acetate 1-(1H-indol-3-yl)-N,N-dimethylmethanaminium)



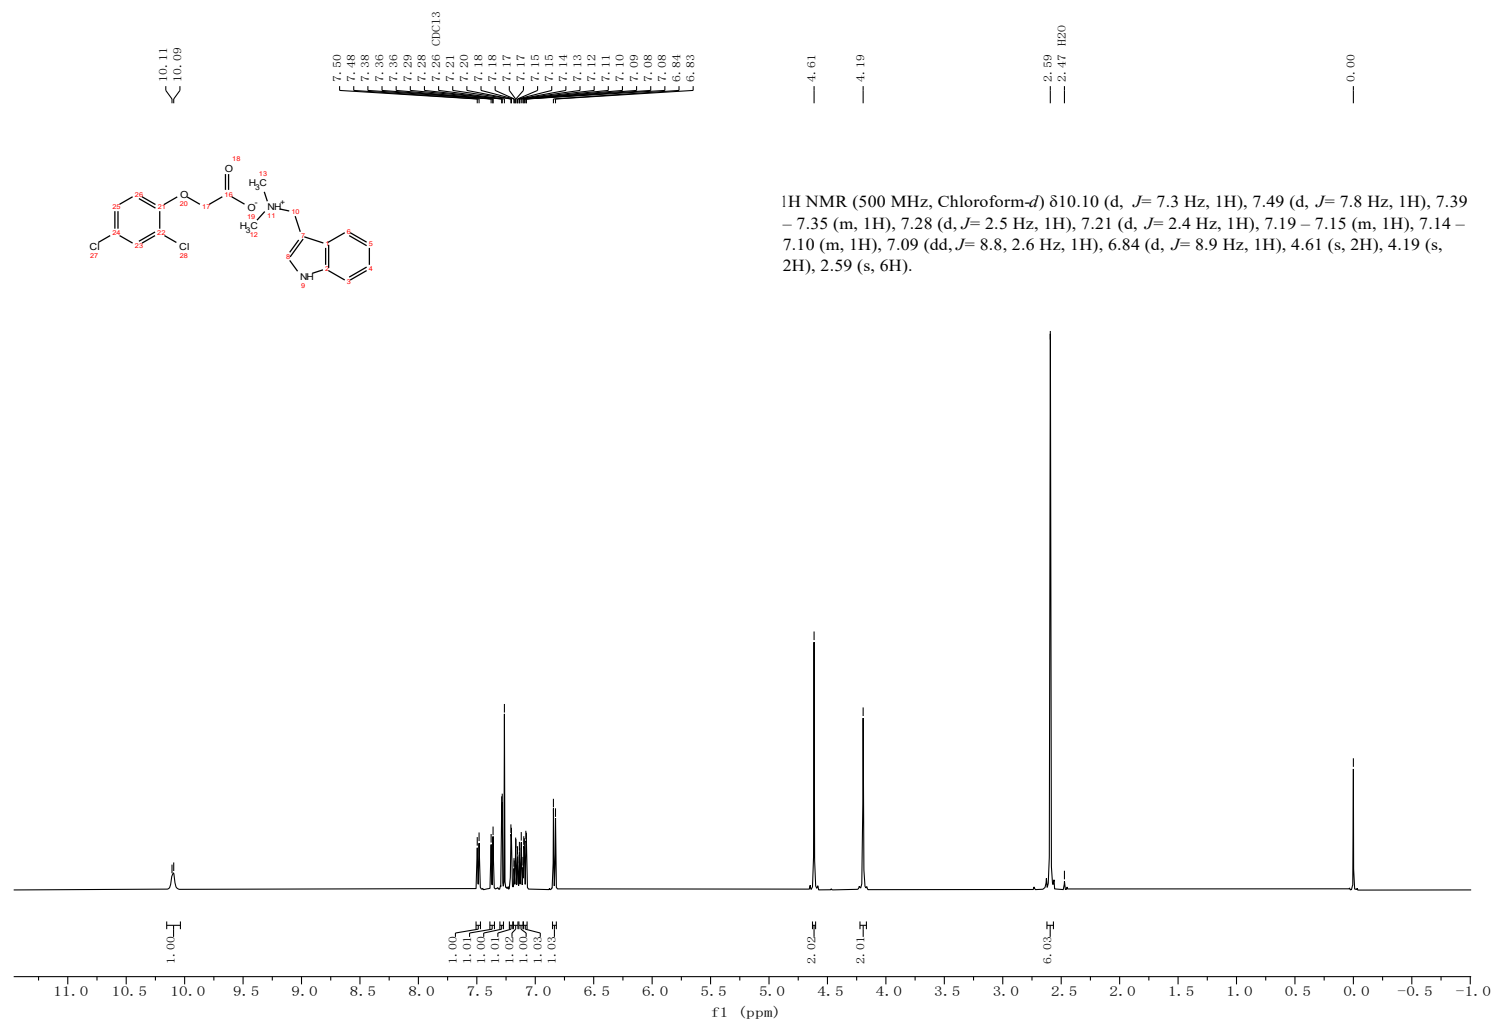

Fig. S6 <sup>1</sup>H NMR (500 MHz; CDCl<sub>3</sub>; Me<sub>4</sub>Si) of DIL-2 after volatility test

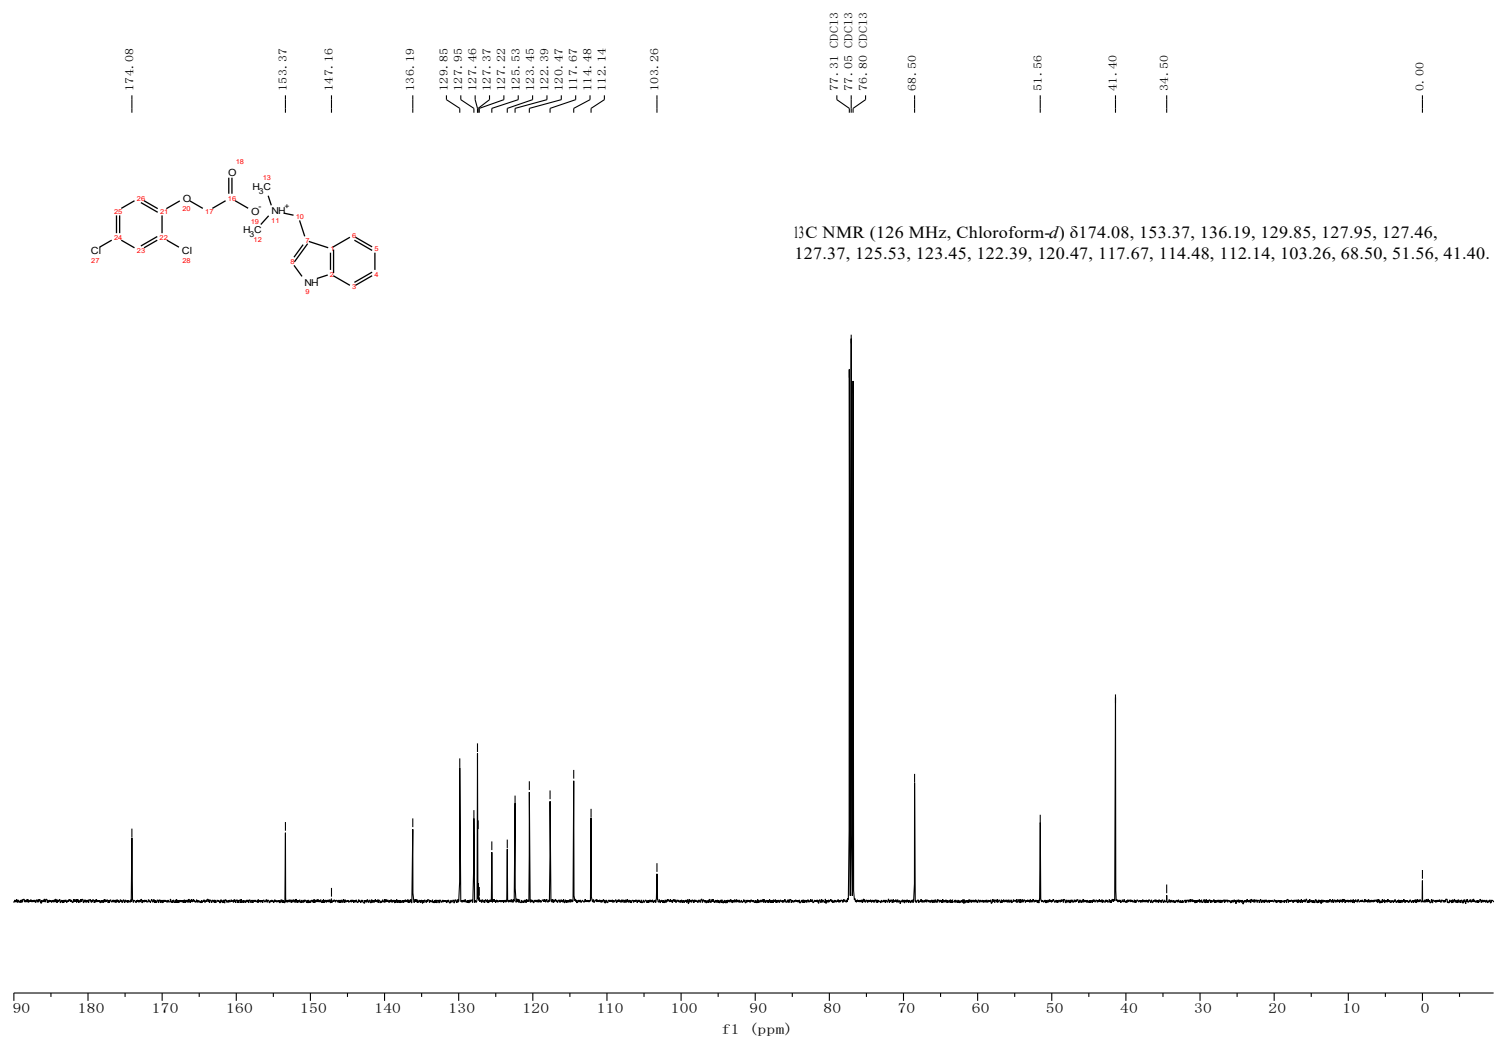

Fig. S7 <sup>13</sup>C NMR (126 MHz; CDCl<sub>3</sub>; Me<sub>4</sub>Si) of DIL-2 (2-(2,4-dichlorophenoxy)acetate 1-(1H-indol-3-yl)-N,N-dimethylmethanaminium)

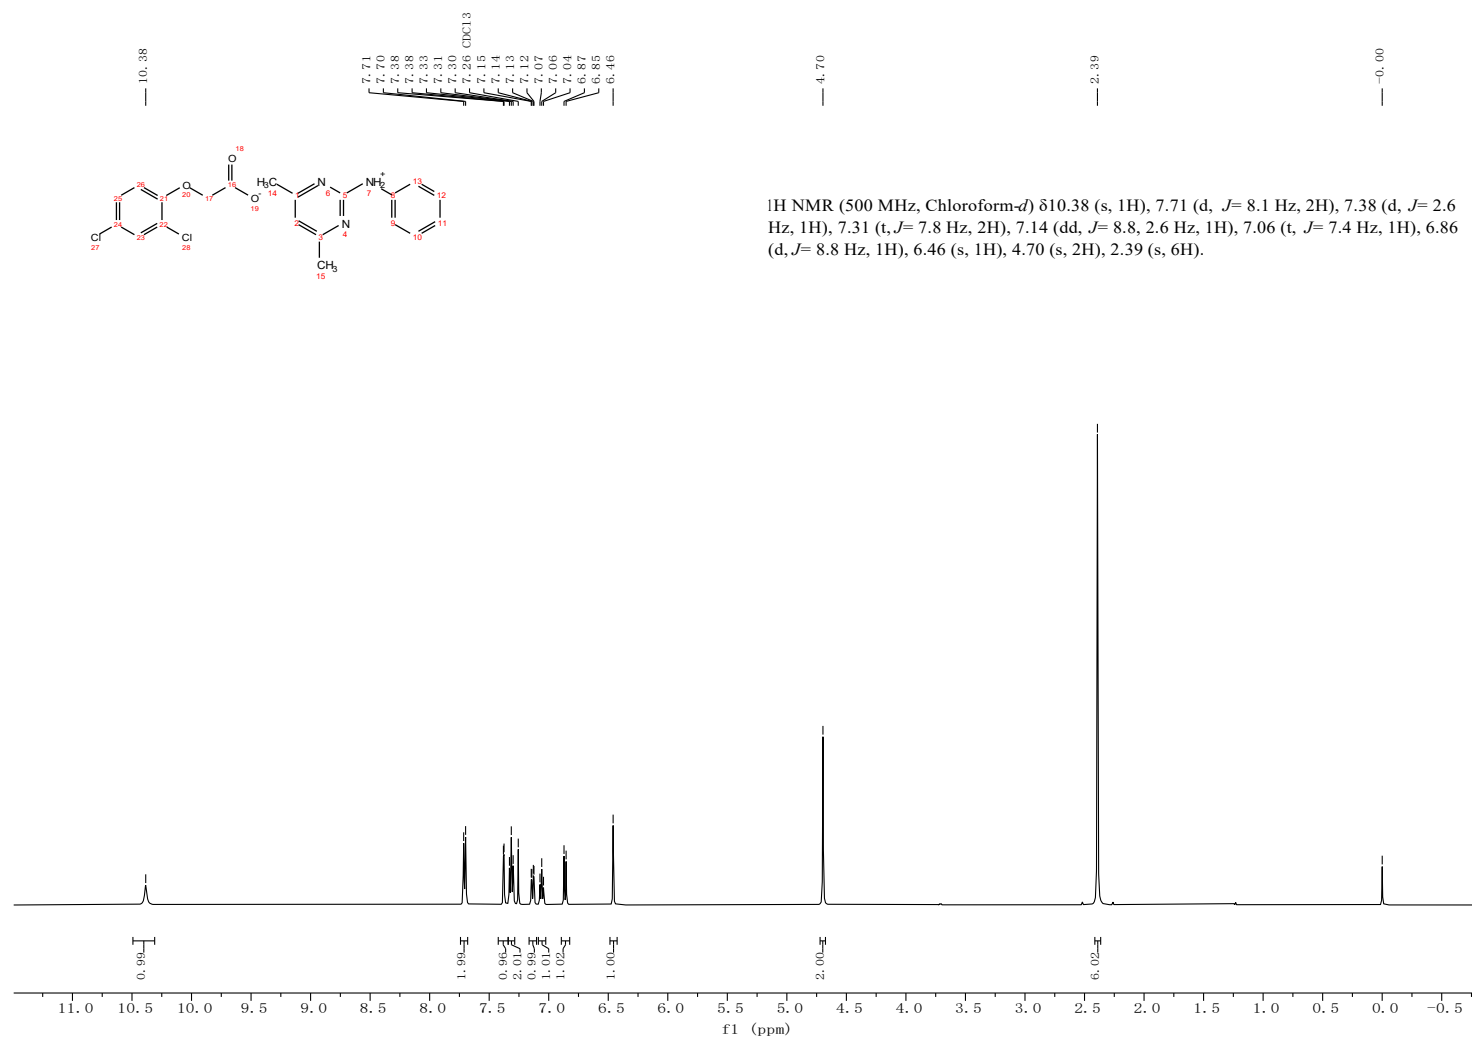

Fig. S8 <sup>1</sup>H NMR (500 MHz; CDCl<sub>3</sub>; Me<sub>4</sub>Si) of DIL-3 (2-(2,4-dichlorophenoxy)acetate 4,6-dimethyl-N-phenylpyrimidin-2-aminium)

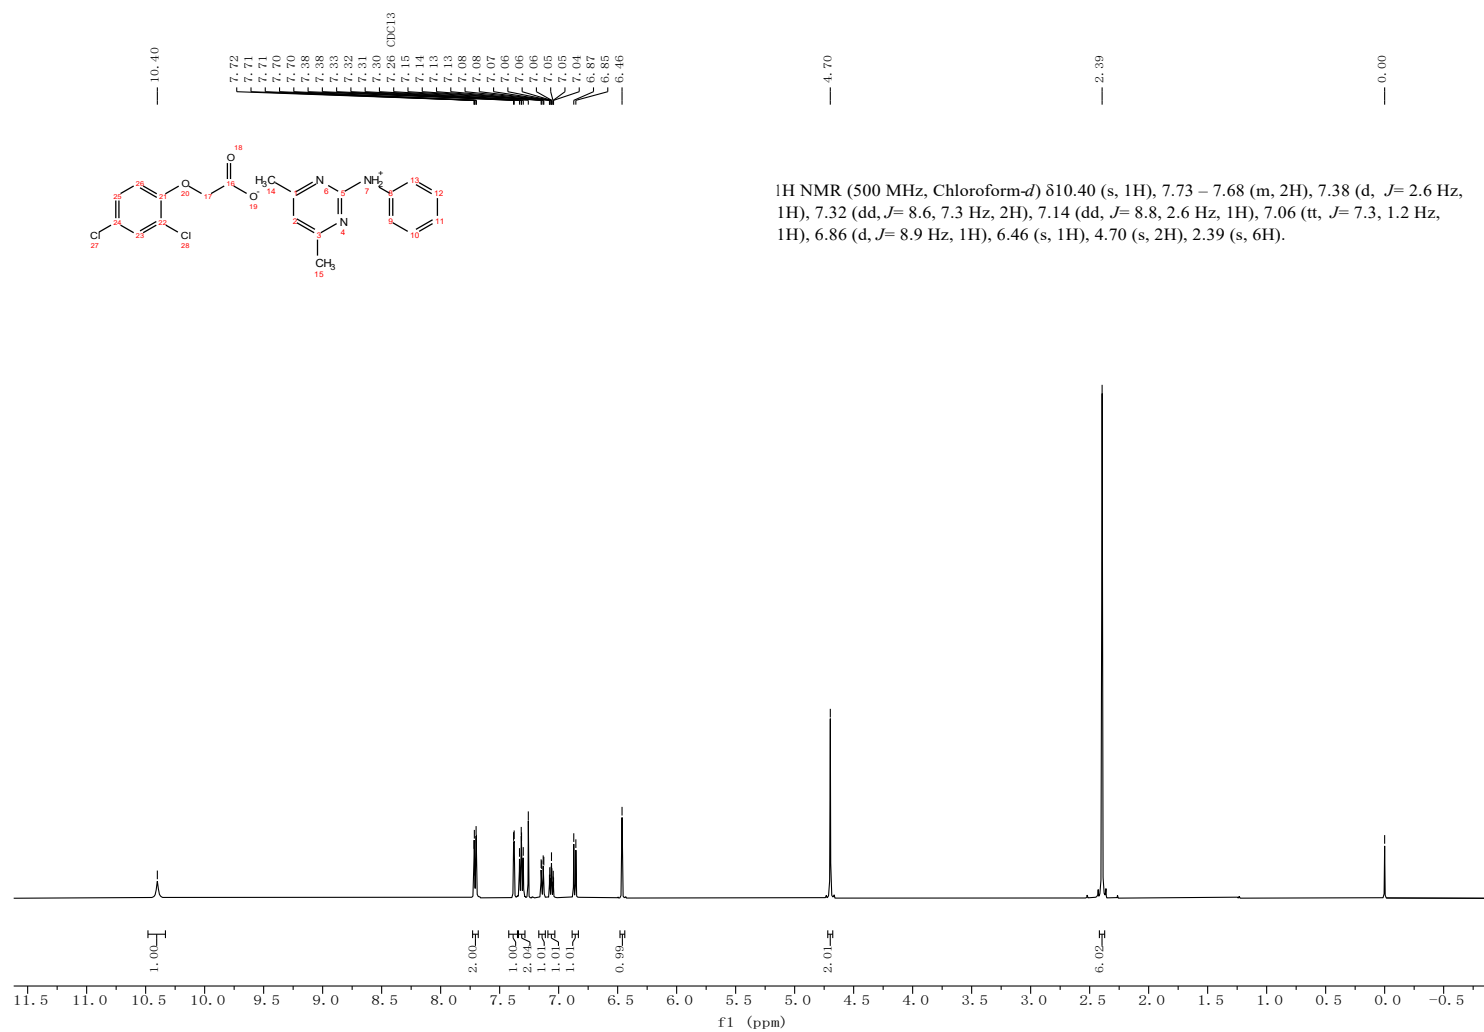

Fig. S9 <sup>1</sup>H NMR (500 MHz; CDCl<sub>3</sub>; Me<sub>4</sub>Si) of DIL-3 after volatility test

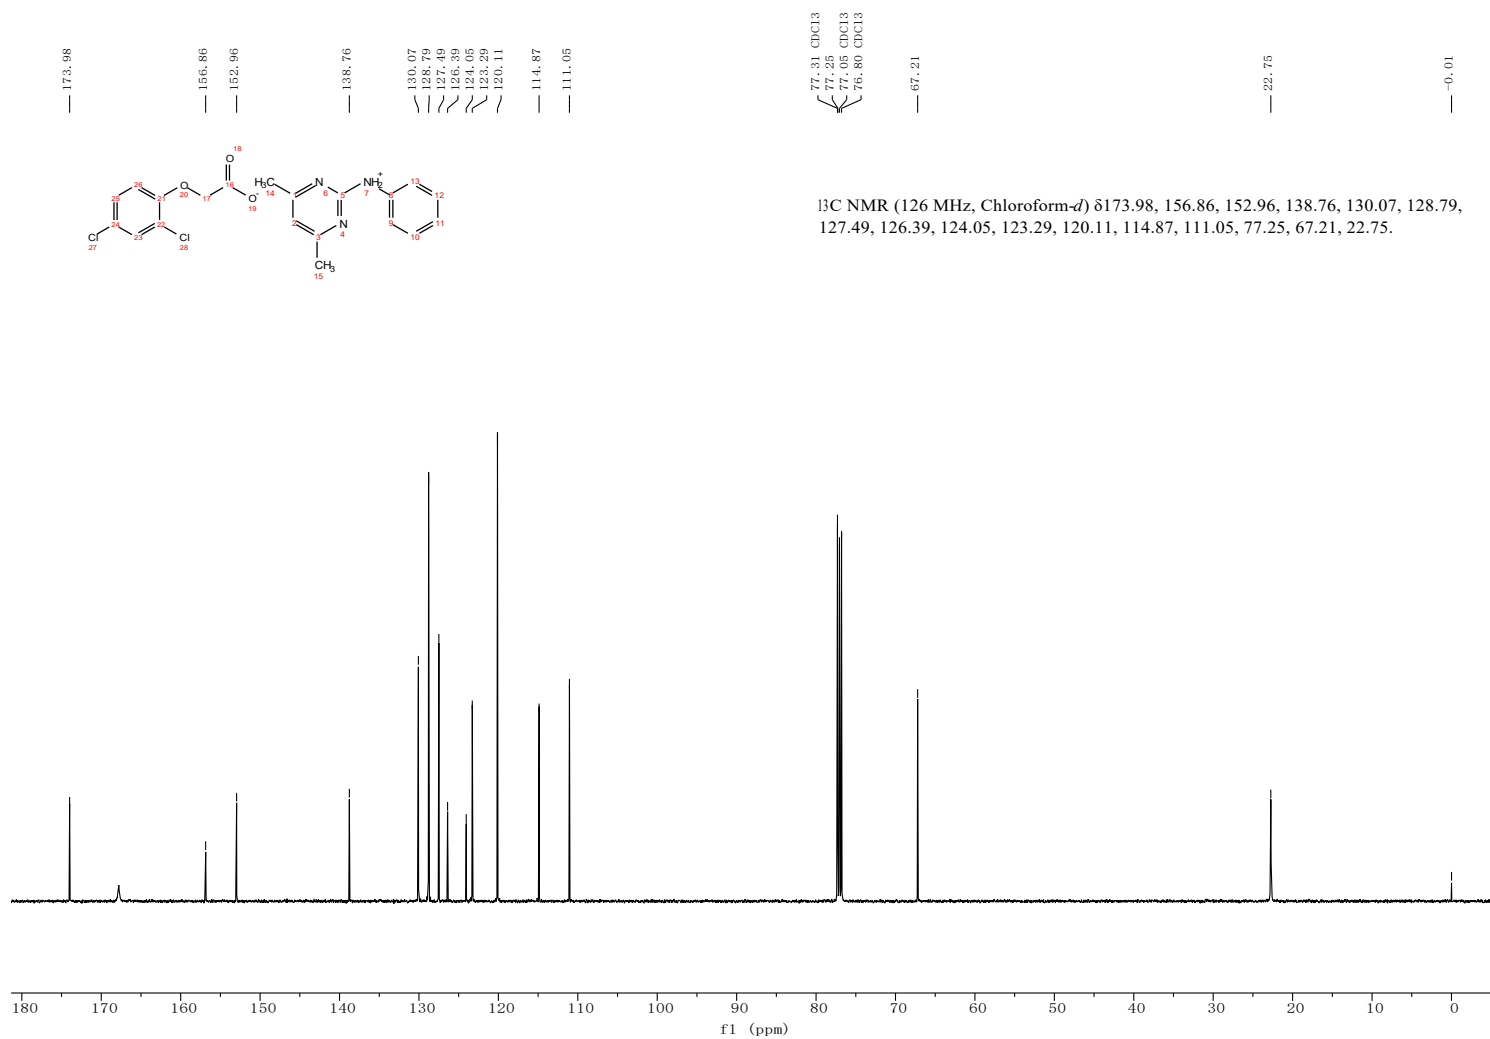

Fig S10 <sup>13</sup>C NMR (126 MHz; CDCl<sub>3</sub>; Me<sub>4</sub>Si) of DIL-3 (2-(2,4-dichlorophenoxy)acetate 4,6-dimethyl-N-phenylpyrimidin-2-aminium)

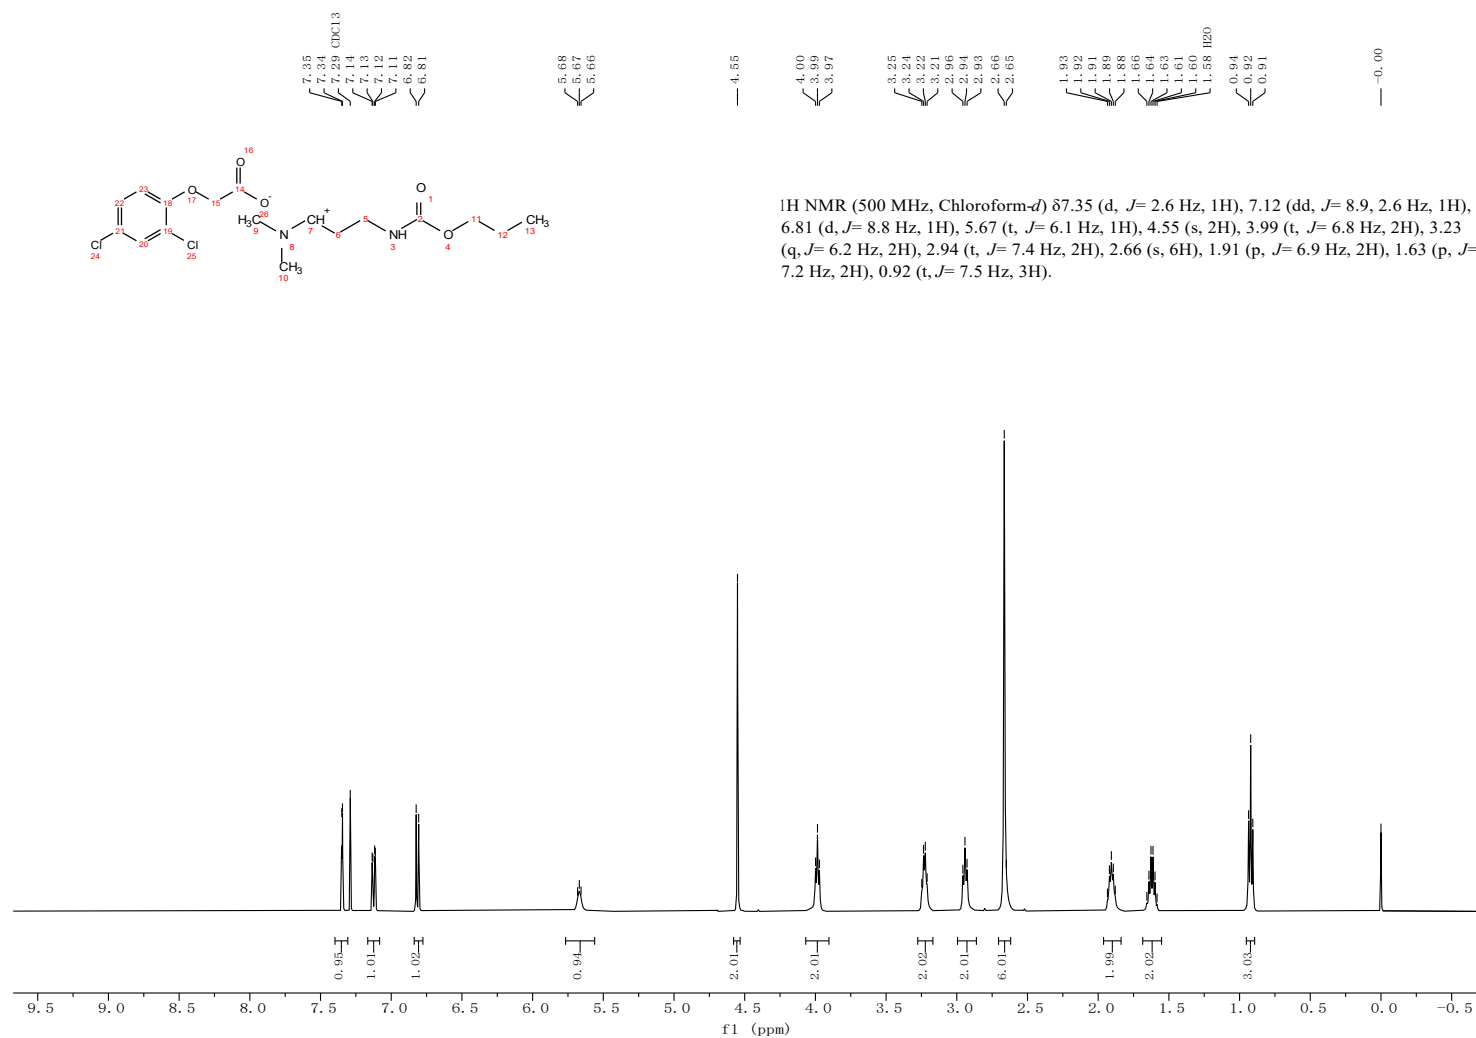

Fig. S11 <sup>1</sup>H NMR (500 MHz; CDCl<sub>3</sub>; Me<sub>4</sub>Si) of DIL-4 (2-(2,4-dichlorophenoxy)acetate N,N-dimethyl-3-((propoxycarbonyl)amino)propan-1-ylum-1-aminium)

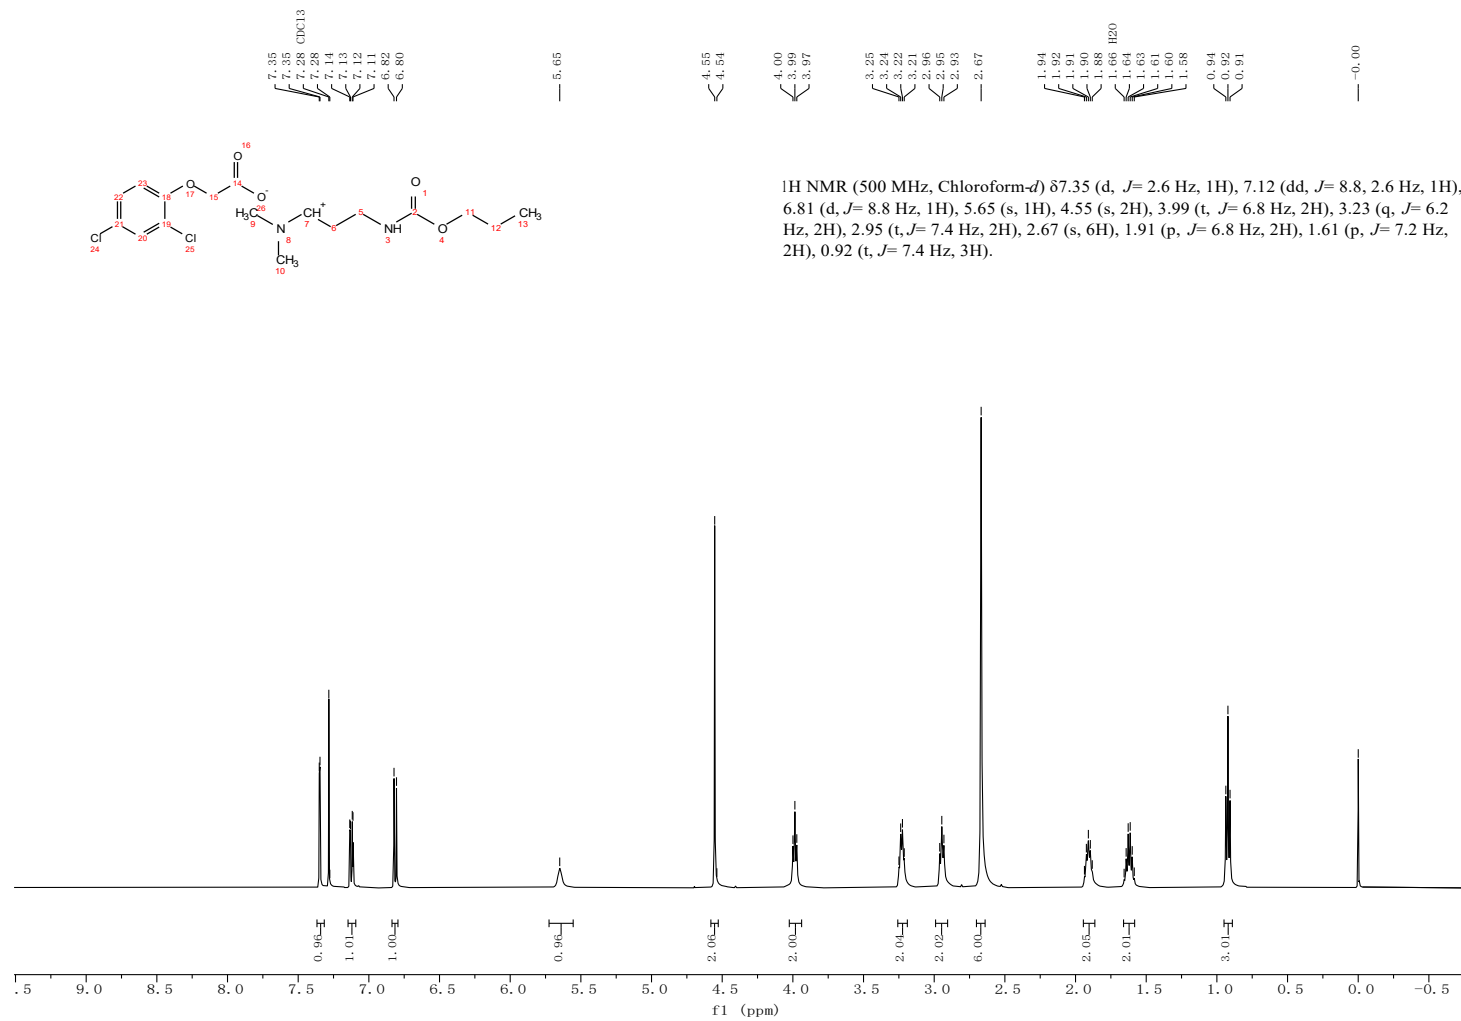

Fig. S12 <sup>1</sup>H NMR (500 MHz; CDCl<sub>3</sub>; Me<sub>4</sub>Si) of DIL-4 after volatility test





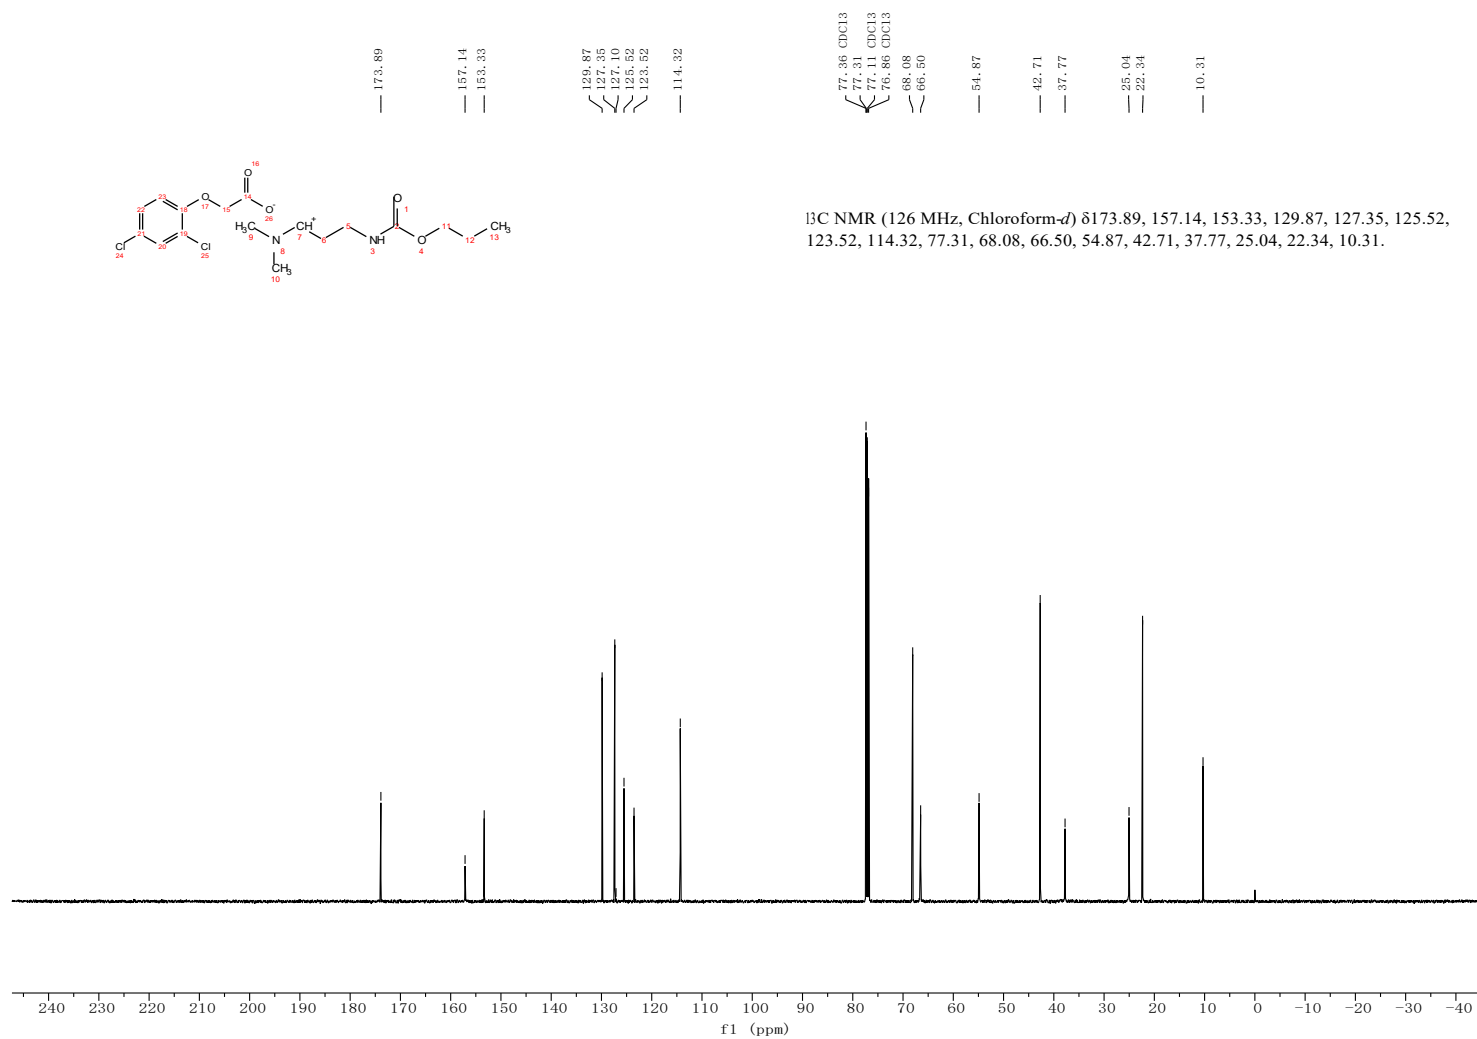

Fig. S13 <sup>13</sup>C NMR (126 MHz; CDCl<sub>3</sub>; Me<sub>4</sub>Si) of DIL-4 (2-(2,4-dichlorophenoxy)acetate N,N-dimethyl-3-((propoxycarbonyl)amino)propan-1-ylum-1-aminium)

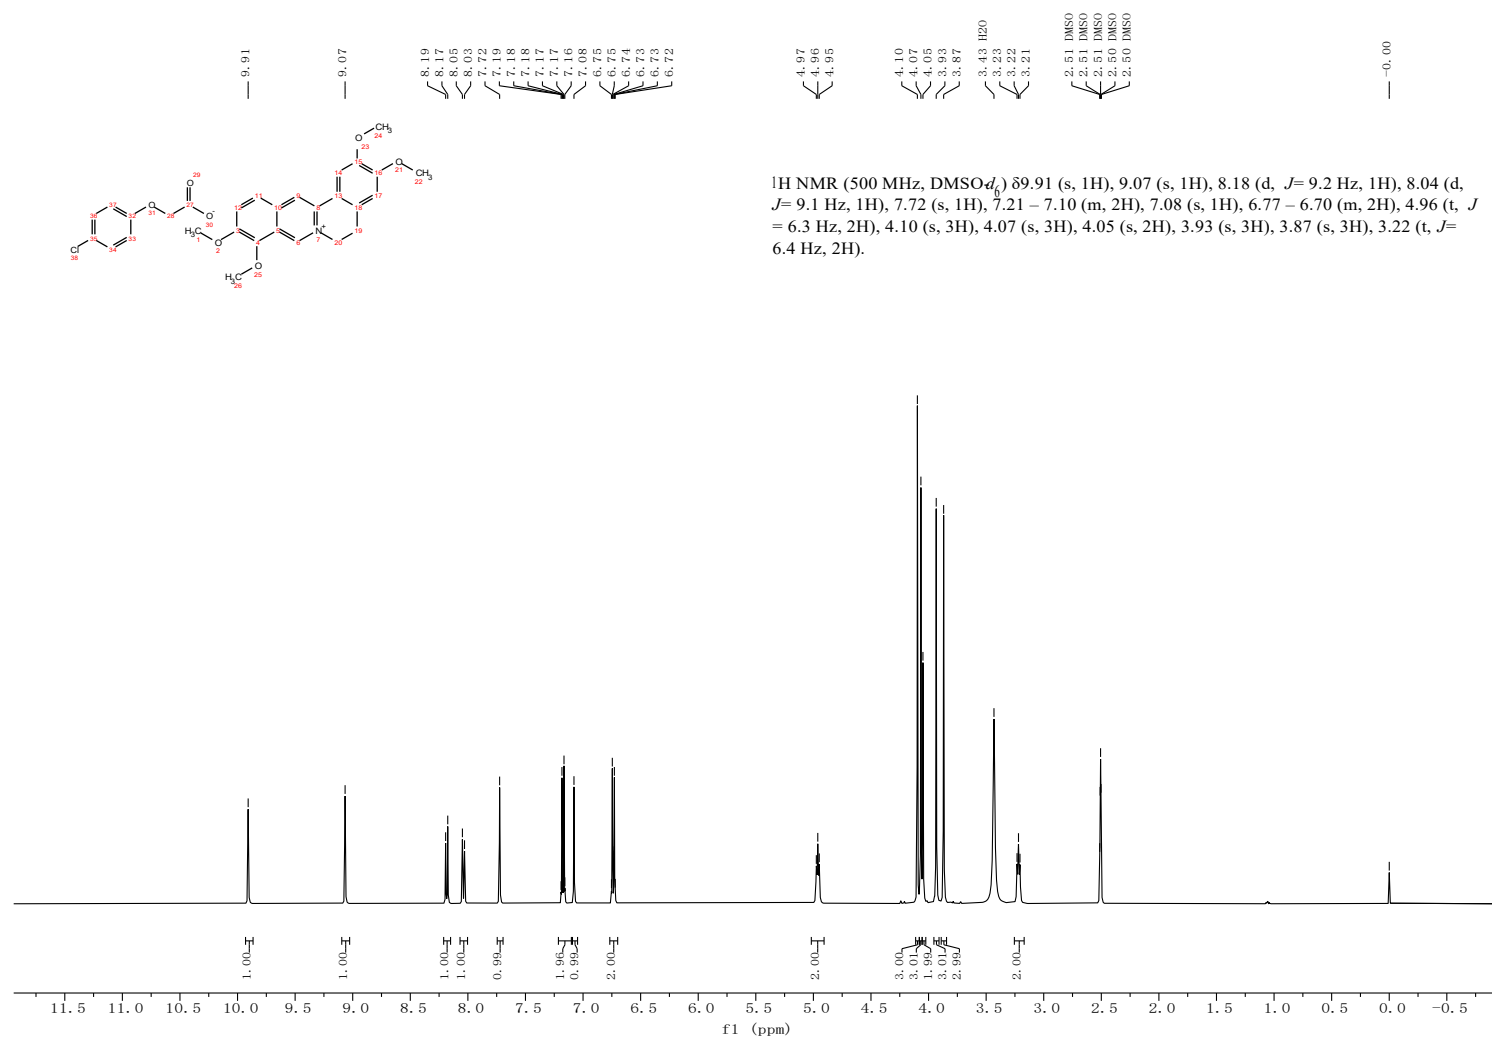

Fig. S14 <sup>1</sup>H NMR (500 MHz; DMSO-*d*<sub>6</sub>; Me<sub>4</sub>Si) of CIL-1 (2-(4-chlorophenoxy)acetate 2,3,9,10-tetramethoxy-5,6-dihydroisoquinolino[3,2-*a*]isoquinolin-7-ium)

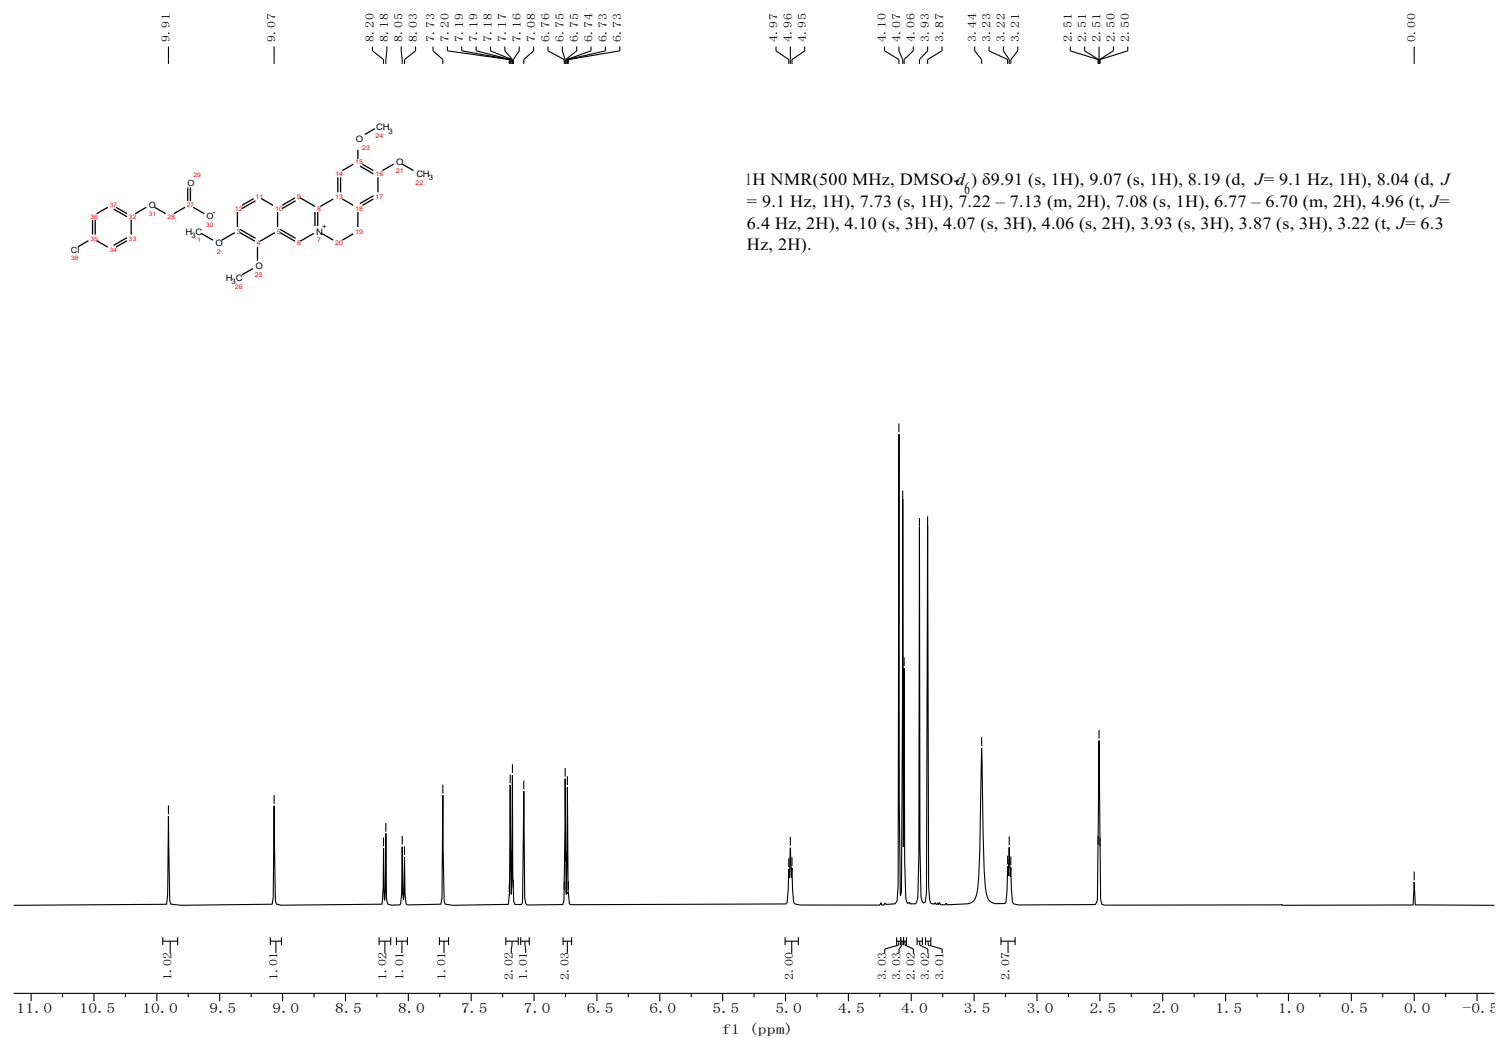

<sup>1</sup>H NMR(500 MHz, DMSO-*d*<sub>6</sub>) δ9.91 (s, 1H), 9.07 (s, 1H), 8.19 (d, *J* = 9.1 Hz, 1H), 8.04 (d, *J* = 9.1 Hz, 1H), 7.73 (s, 1H), 7.22 – 7.13 (m, 2H), 7.08 (s, 1H), 6.77 – 6.70 (m, 2H), 4.96 (t, *J* = 6.4 Hz, 2H), 4.10 (s, 3H), 4.07 (s, 3H), 4.06 (s, 2H), 3.93 (s, 3H), 3.87 (s, 3H), 3.22 (t, *J* = 6.3 Hz, 2H).

Fig. S15 <sup>1</sup>H NMR (500 MHz; DMSO-*d*<sub>6</sub>; Me<sub>4</sub>Si) of CIL-1 after volatility test

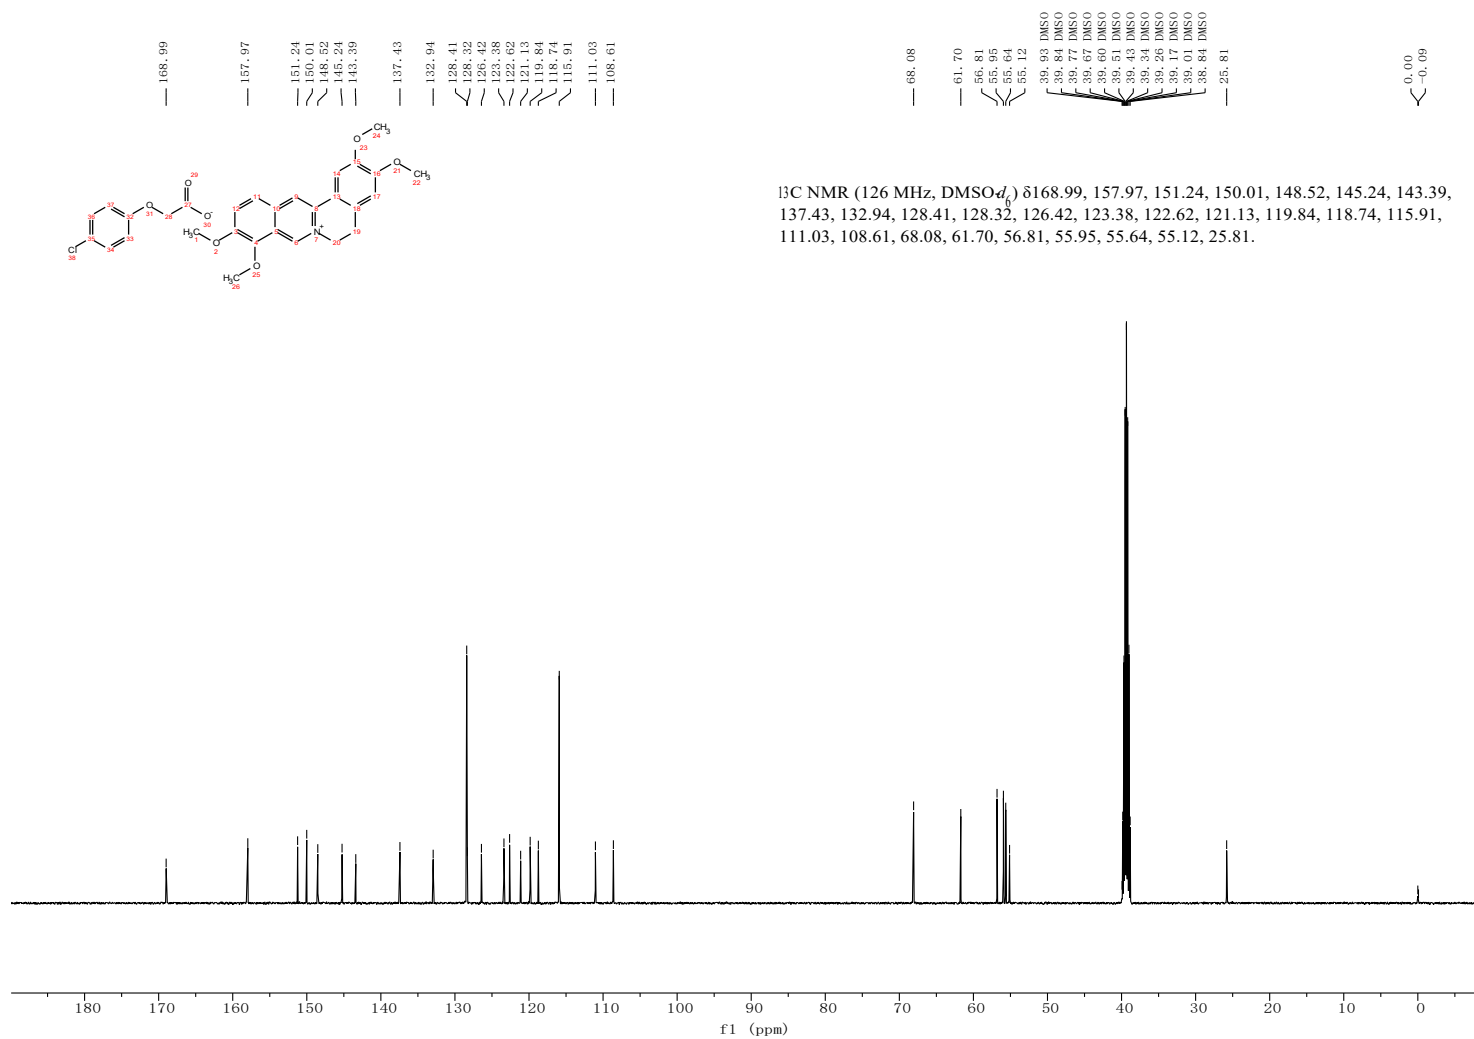

Fig. S16  $^{13}\text{C}$  NMR (126 MHz;  $\text{DMSO-}d_6$ ;  $\text{Me}_4\text{Si}$ ) of CIL-1 (2-(4-chlorophenoxy)acetate 2,3,9,10-tetramethoxy-5,6-dihydroisoquinolino[3,2-a]isoquinolin-7-ium)

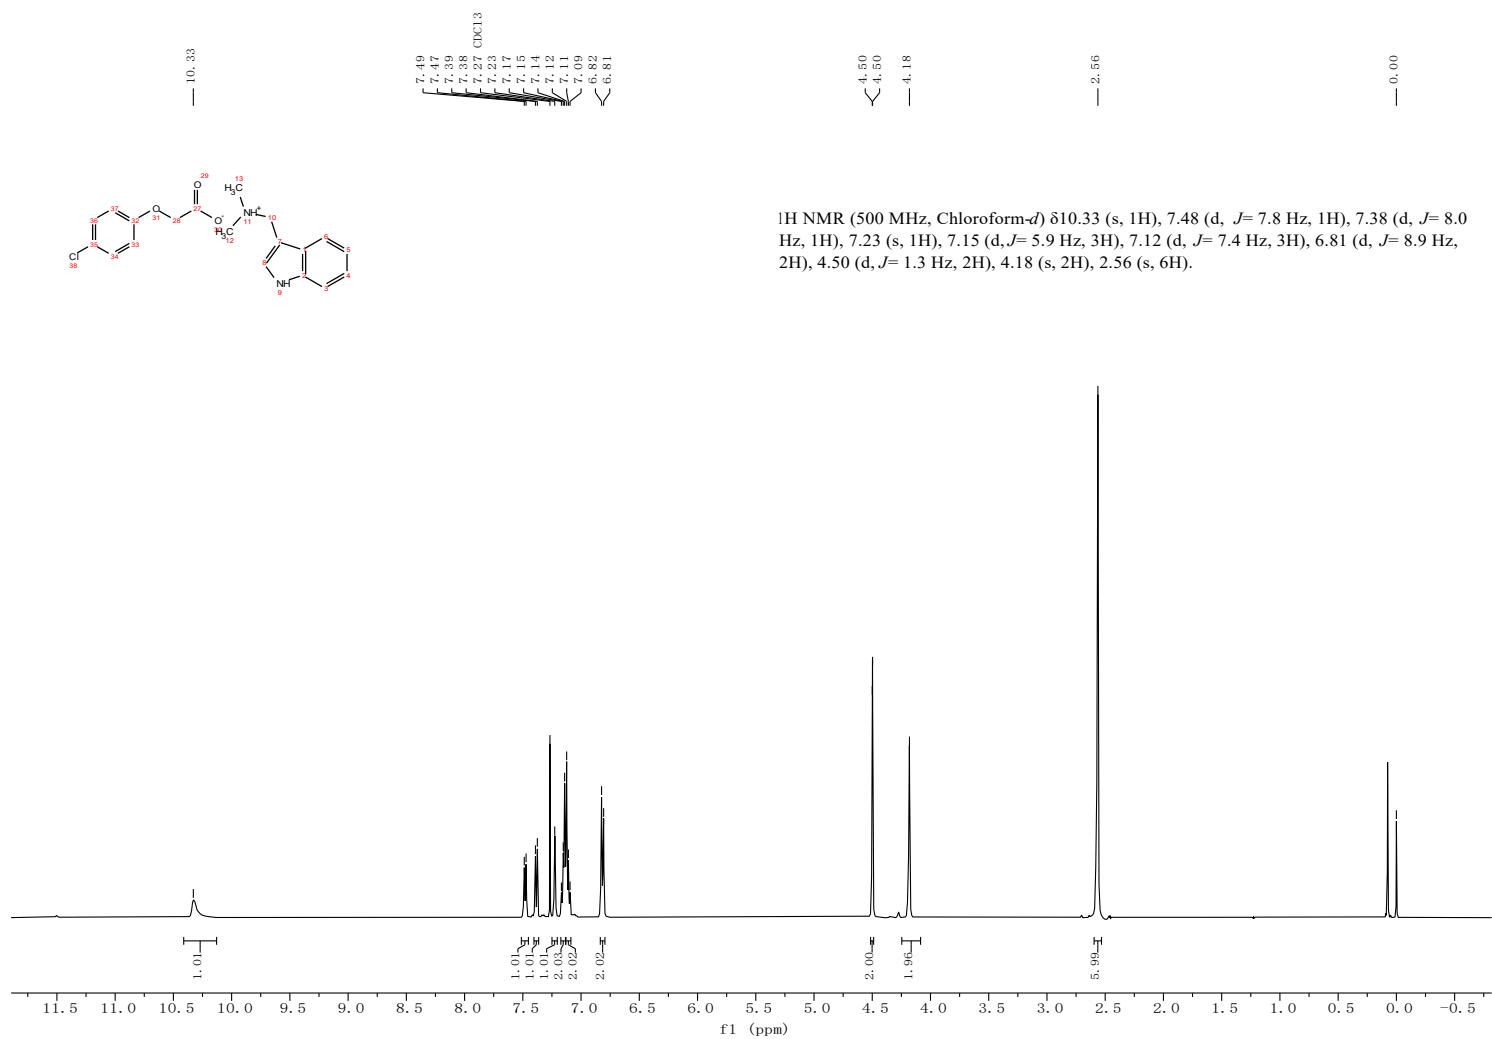

Fig. S17 <sup>1</sup>H NMR (500 MHz; CDCl<sub>3</sub>; Me<sub>4</sub>Si) of CIL-2 (2-(4-chlorophenoxy)acetate 1-(1H-indol-3-yl)-N,N-dimethylmethanaminium)

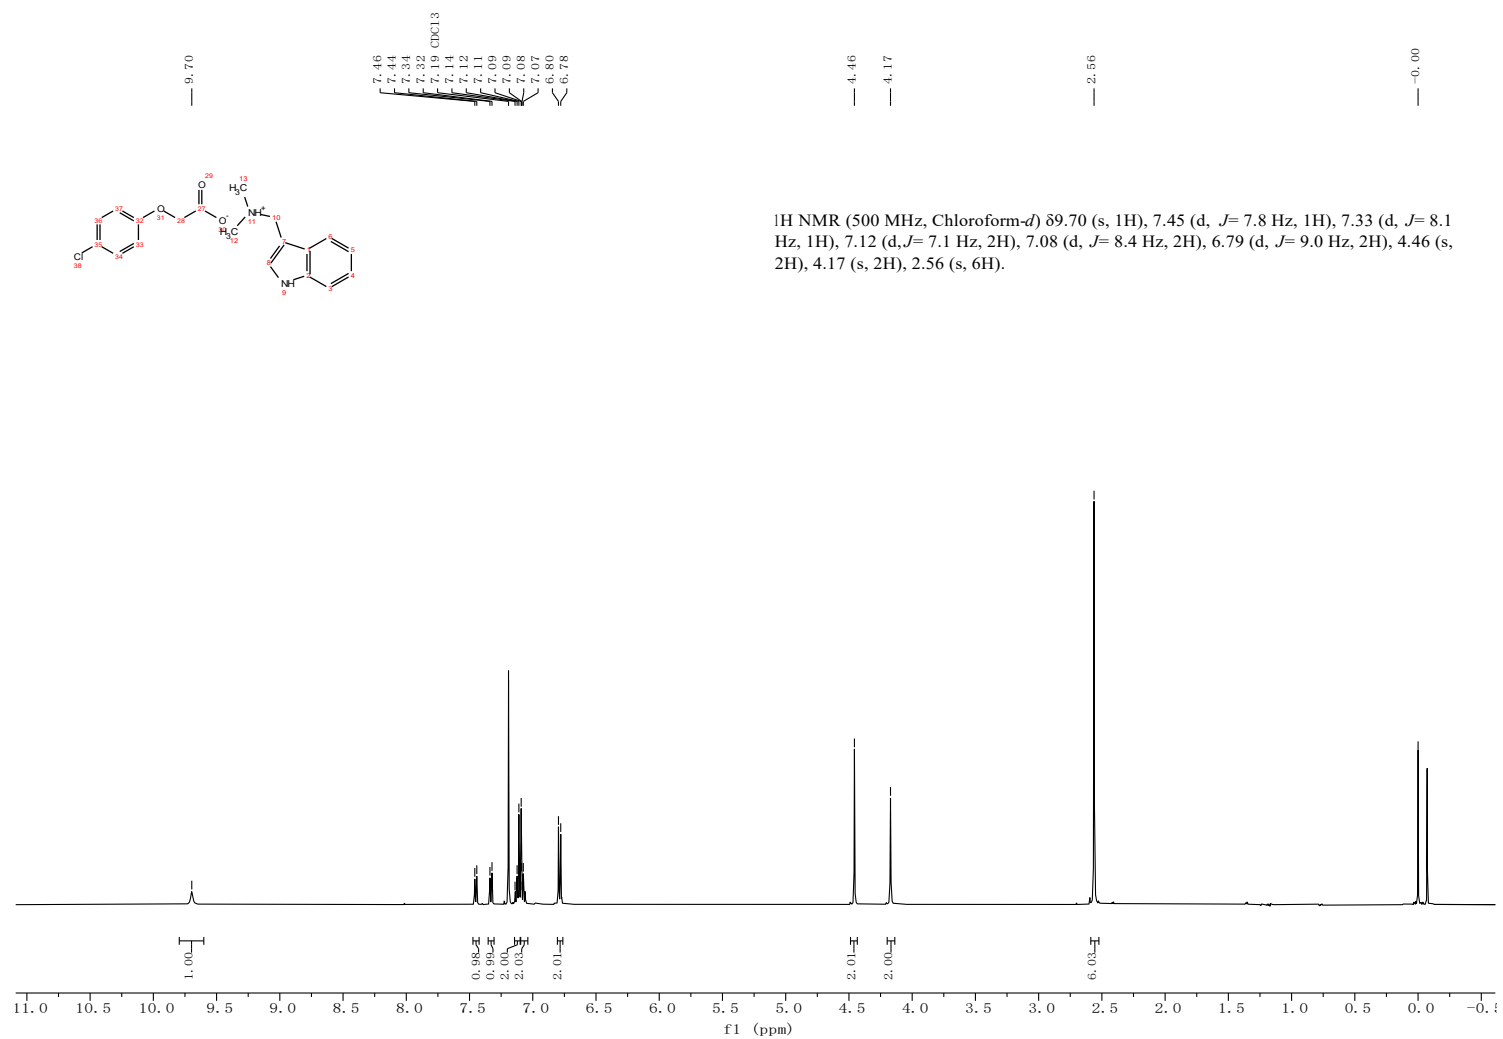

Fig. S18 <sup>1</sup>H NMR (500 MHz; CDCl<sub>3</sub>; Me<sub>4</sub>Si) of CIL-2 after volatility test

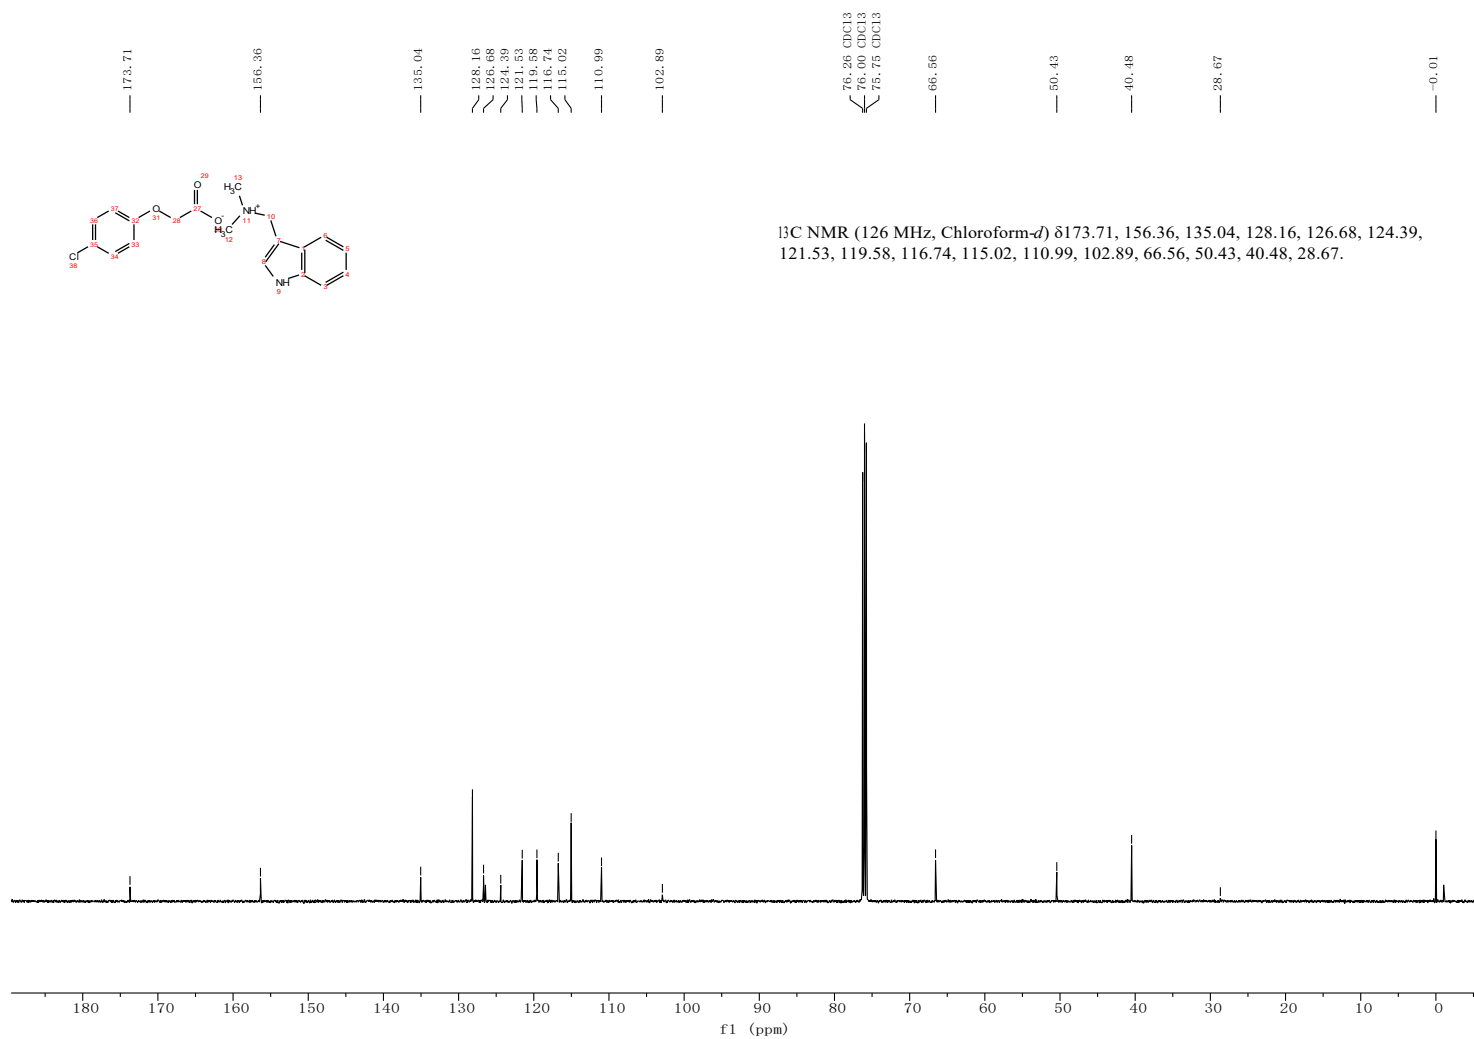

Fig. S19  $^{13}\text{C}$  NMR (126 MHz;  $\text{CDCl}_3$ ;  $\text{Me}_4\text{Si}$ ) of CIL-2 (2-(4-chlorophenoxy)acetate 1-(1H-indol-3-yl)-N,N-dimethylmethanaminium)

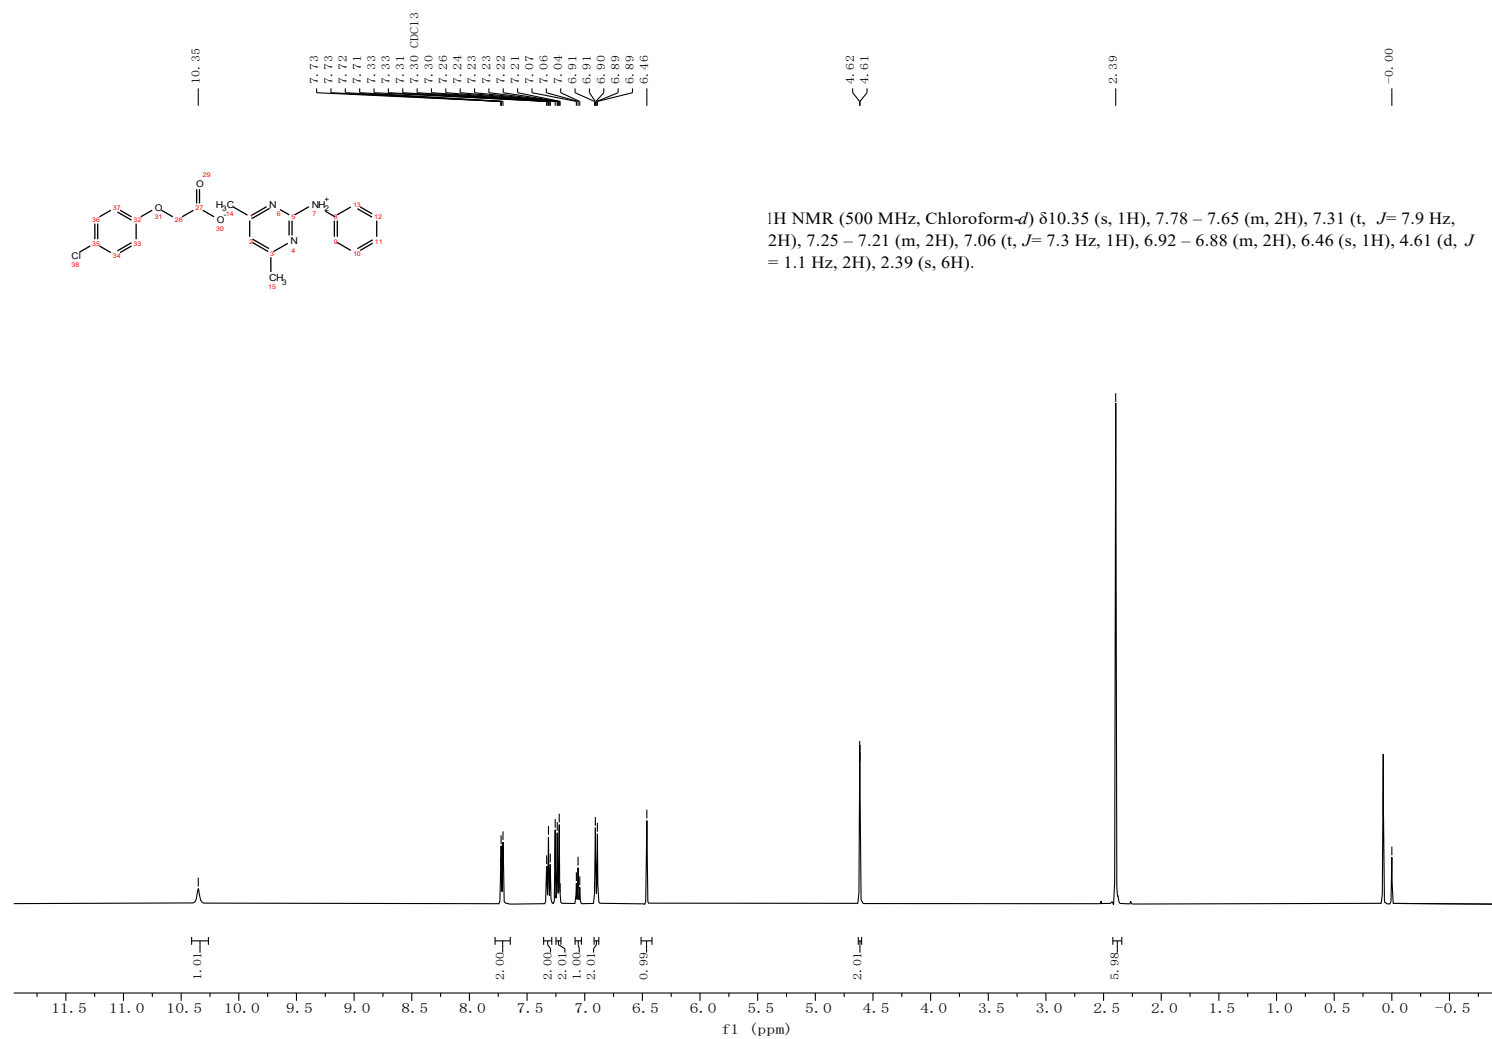

Fig. S20 <sup>1</sup>H NMR (500 MHz; CDCl<sub>3</sub>; Me<sub>4</sub>Si) of CIL-3 (2-(4-chlorophenoxy)acetate 4,6-dimethyl-N-phenylpyrimidin-2-aminium)



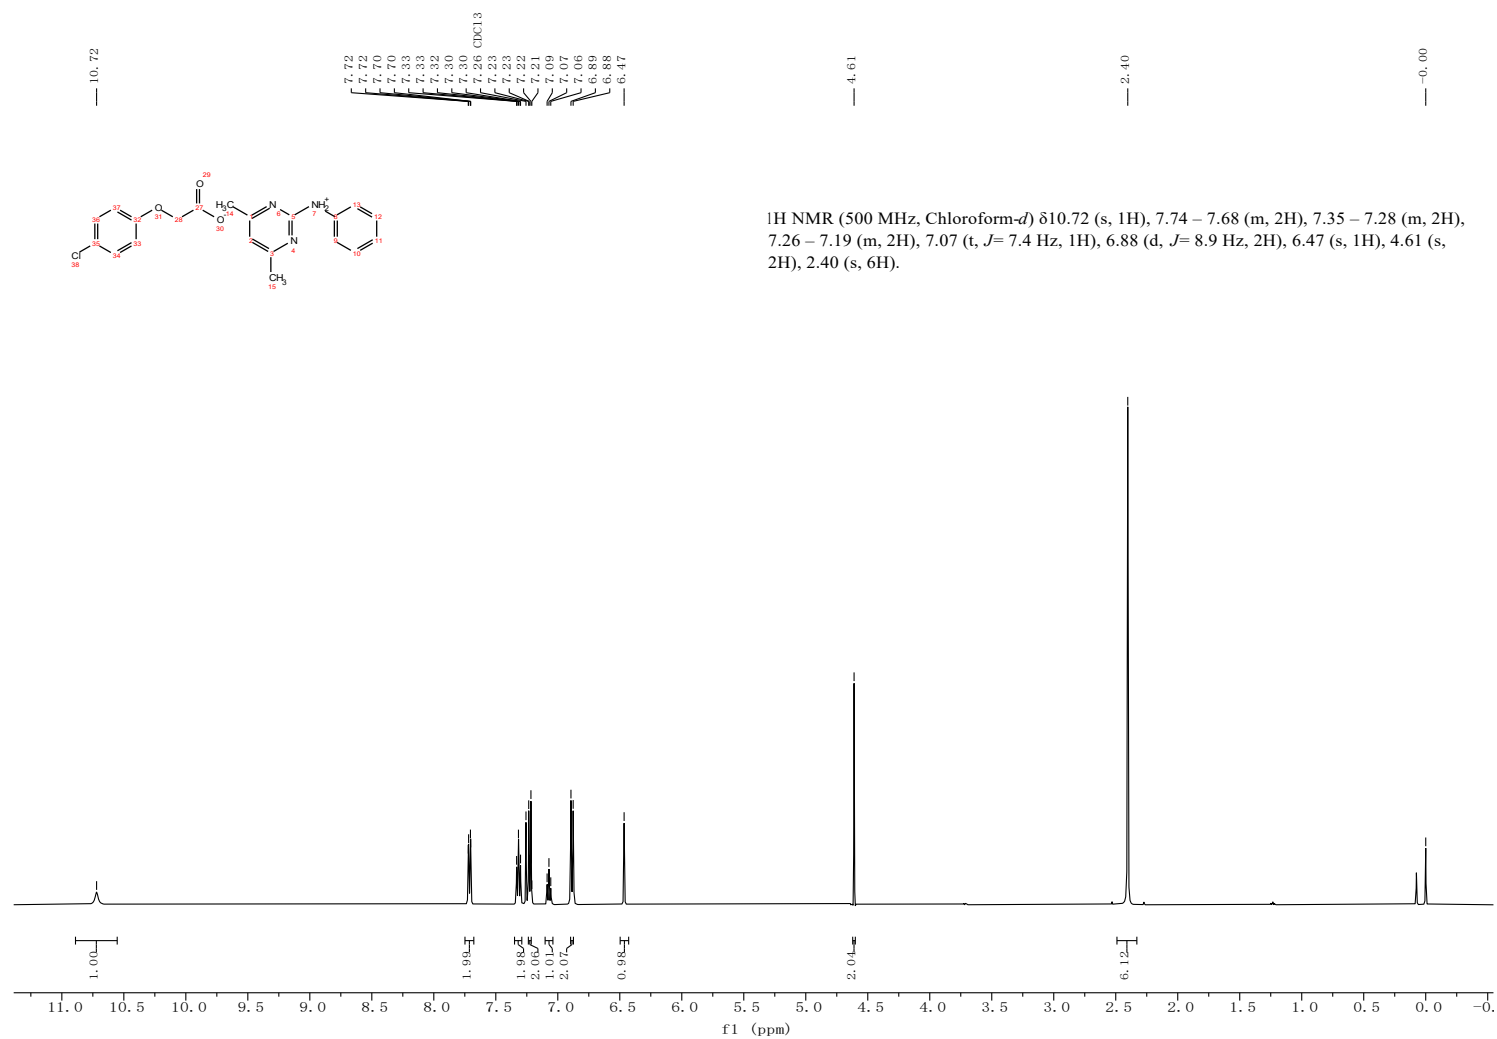

Fig. S21 <sup>1</sup>H NMR (500 MHz; CDCl<sub>3</sub>; Me<sub>4</sub>Si) of CIL-3 after volatility test

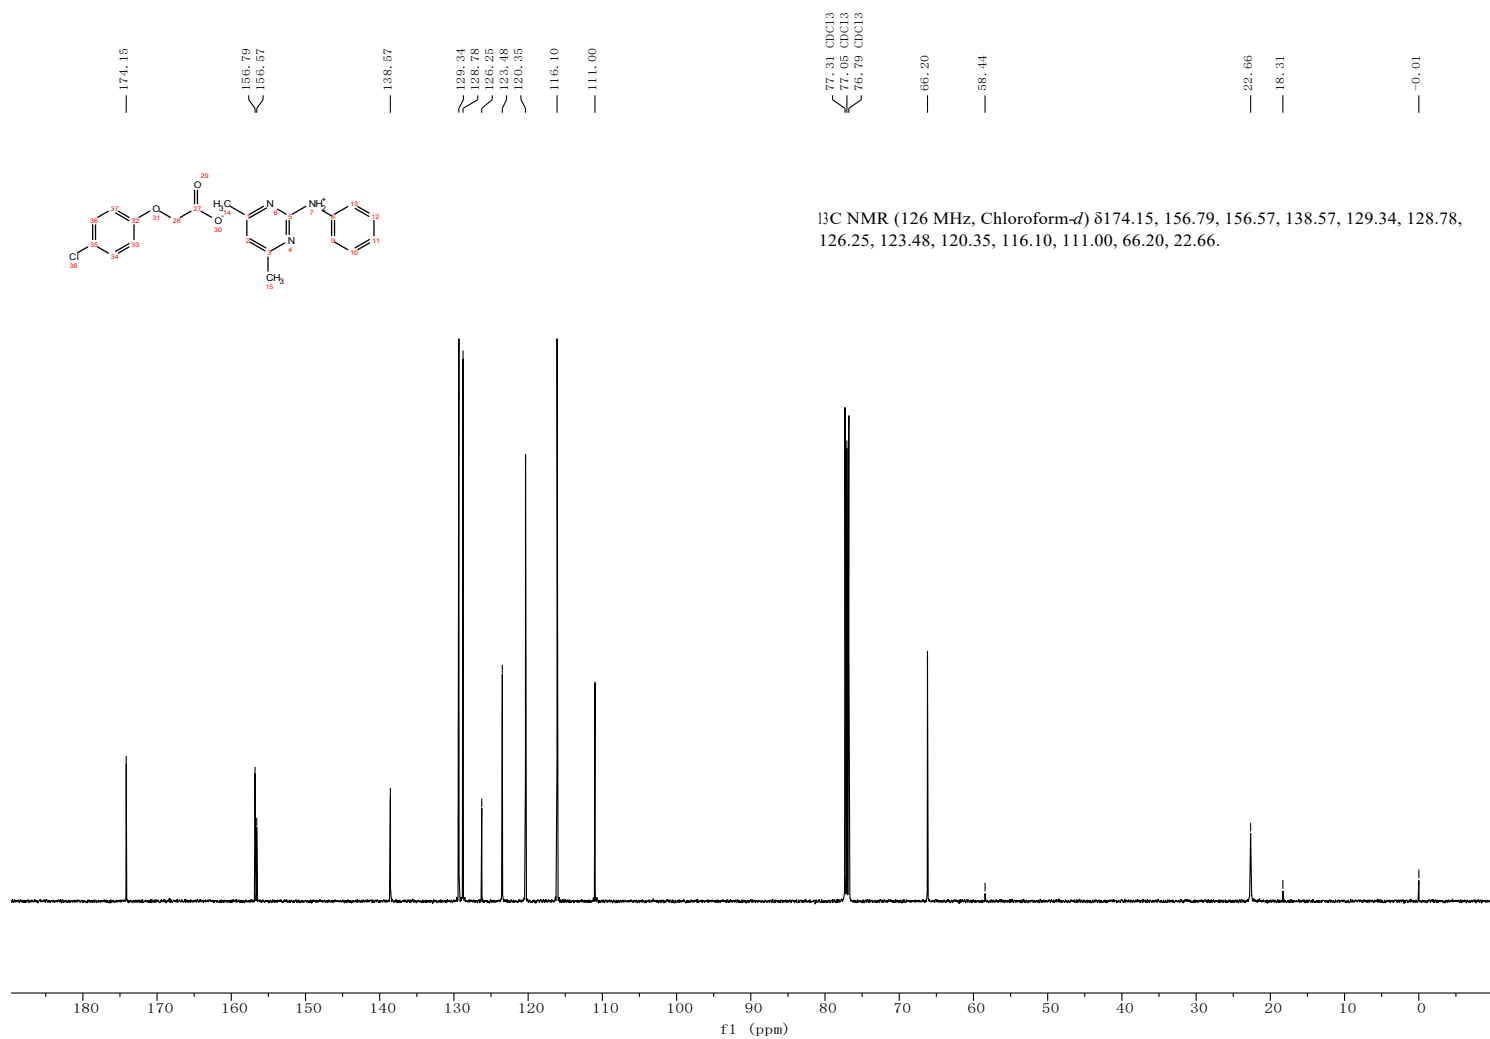

Fig. S22  $^{13}\text{C}$  NMR (126 MHz;  $\text{CDCl}_3$ ;  $\text{Me}_4\text{Si}$ ) of CIL-3 (2-(4-chlorophenoxy)acetate 4,6-dimethyl-N-phenylpyrimidin-2-amium)

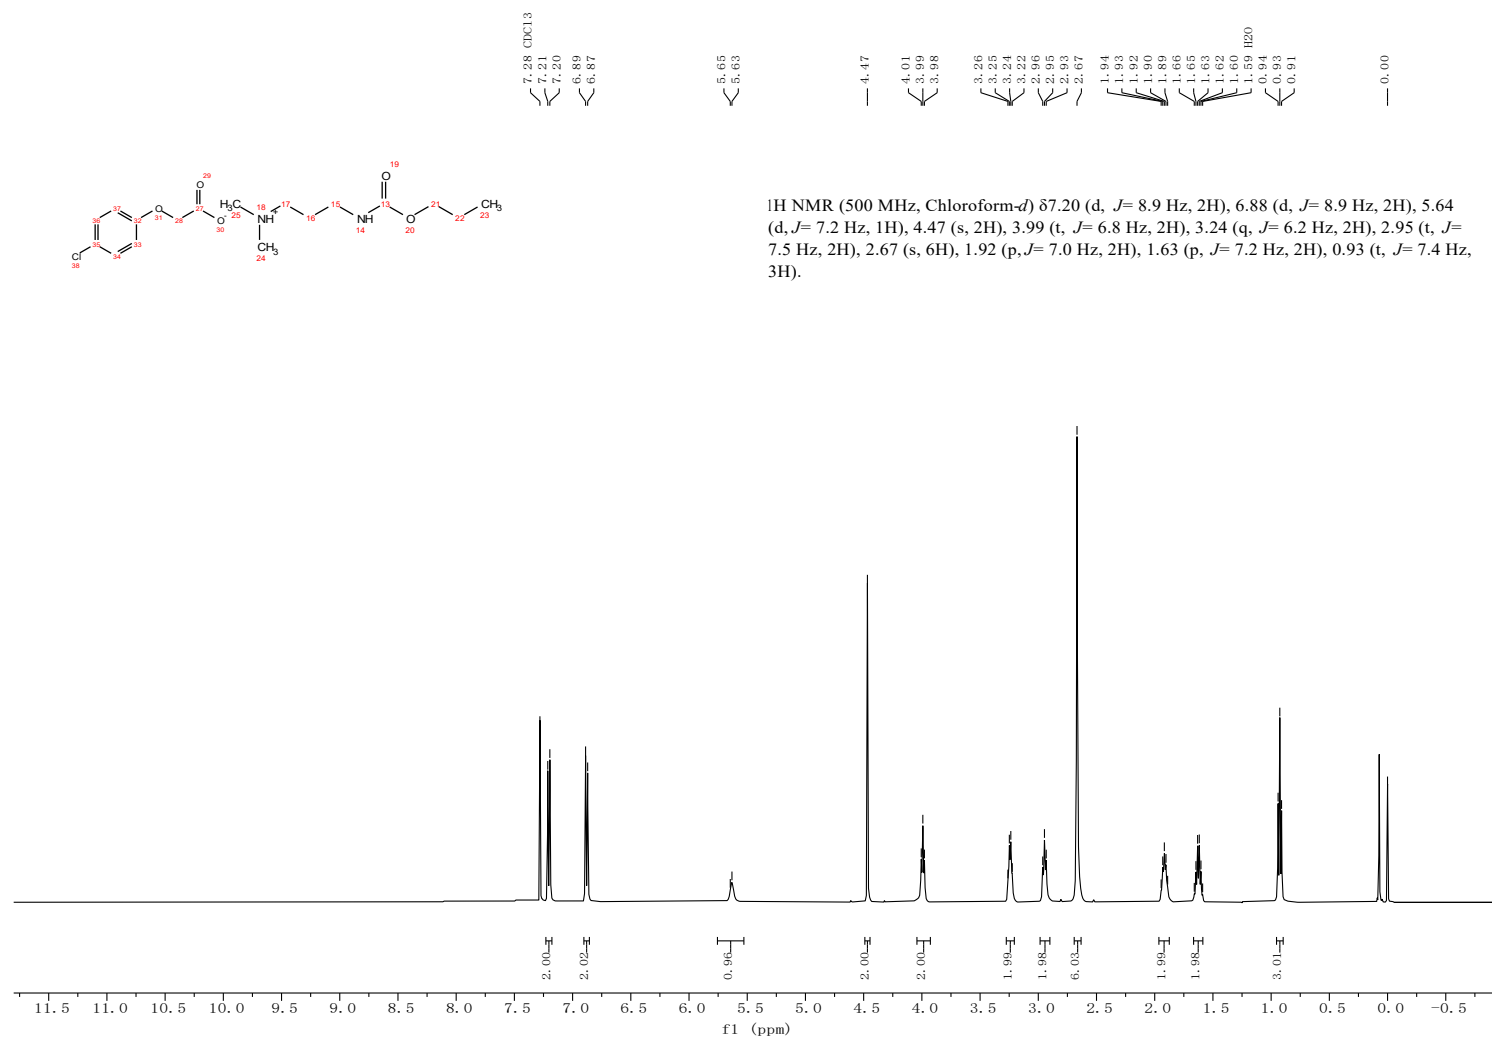

Fig. S23 <sup>1</sup>H NMR (500 MHz; CDCl<sub>3</sub>; Me<sub>4</sub>Si) of CIL-4 (2-(4-chlorophenoxy)acetate N,N-dimethyl-3-((propoxycarbonyl)amino)propan-1-ylum-1-aminium)

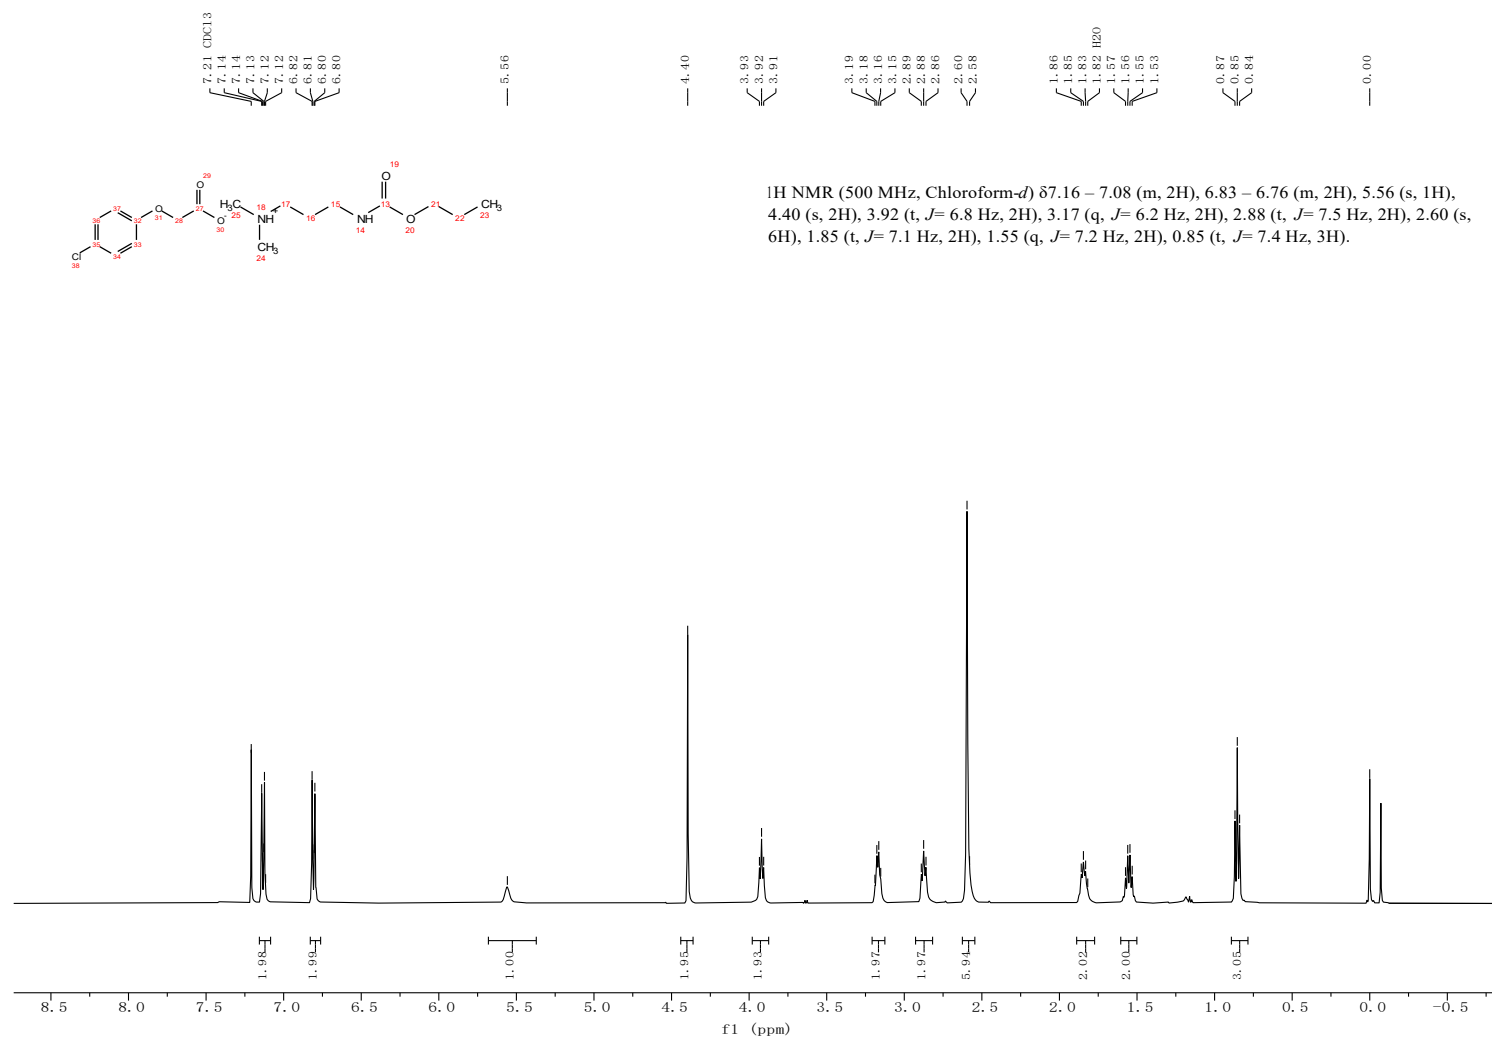

Fig. S24 <sup>1</sup>H NMR (500 MHz; CDCl<sub>3</sub>; Me<sub>4</sub>Si) of CIL-4 after volatility test

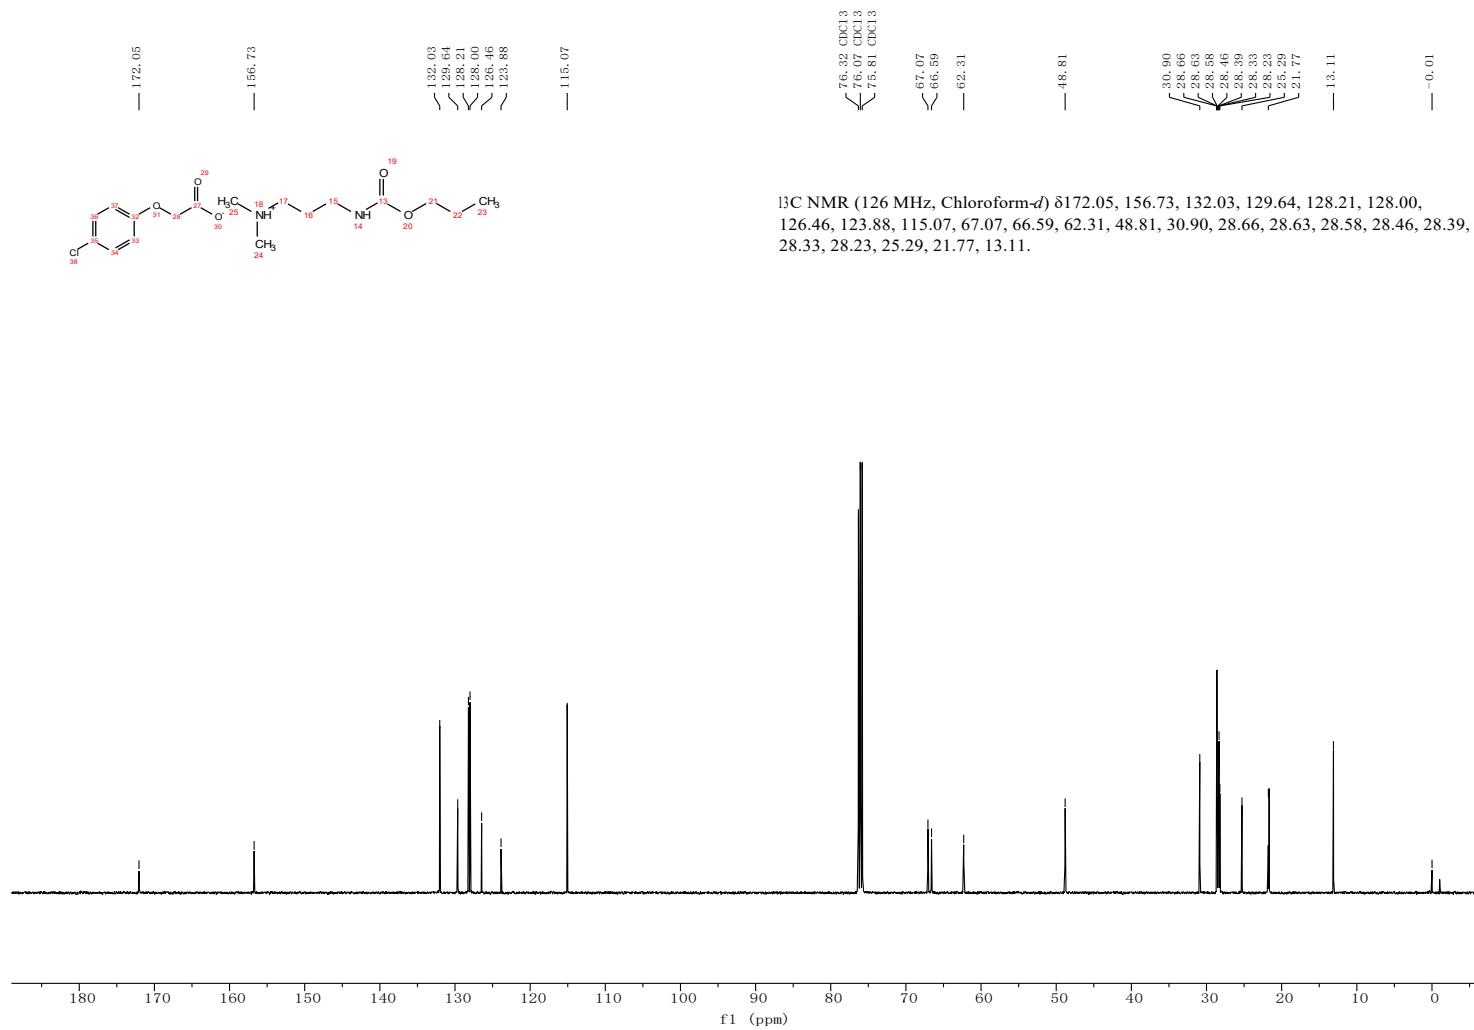

Fig. S25 <sup>13</sup>C NMR (126 MHz; CDCl<sub>3</sub>; Me<sub>4</sub>Si) of CIL-4 (2-(4-chlorophenoxy)acetate N,N-dimethyl-3-((propoxycarbonyl)amino)propan-1-ylum-1-aminium)

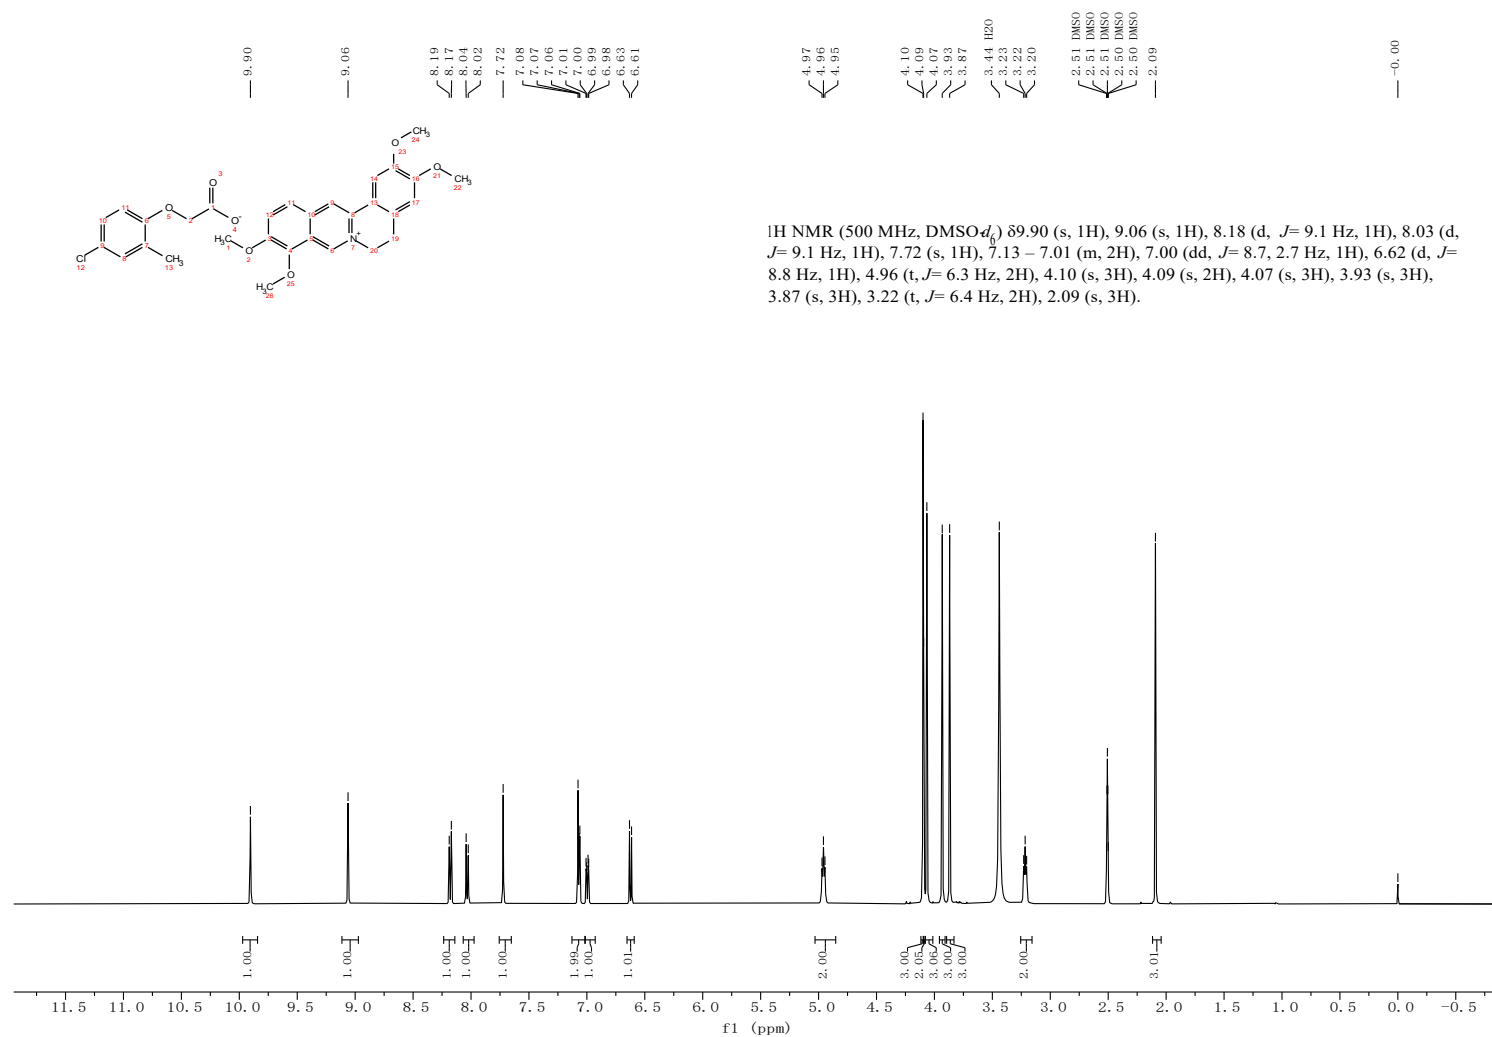

Fig. S26 <sup>1</sup>H NMR (500 MHz; DMSO-*d*<sub>6</sub>; Me<sub>4</sub>Si) of MIL-1 (2-(4-chloro-2-methylphenoxy)acetate 2,3,9,10-tetramethoxy-5,6-dihydroisoquinolino[3,2-a]isoquinolin-7-ium)

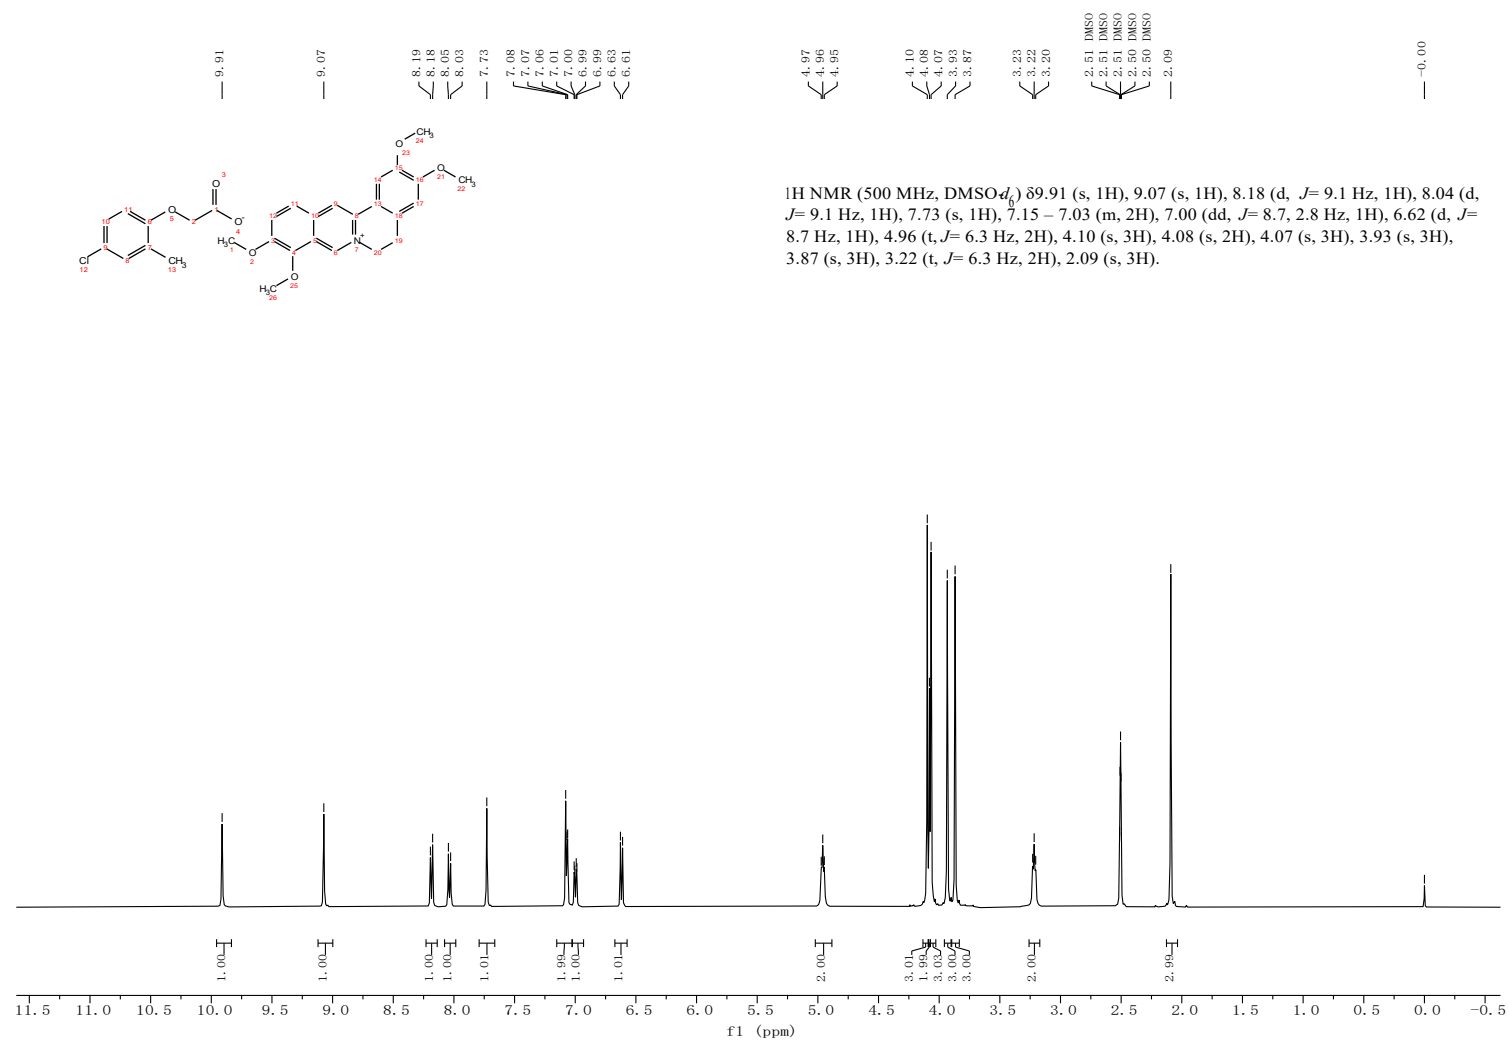

Fig. S27  $^1\text{H NMR}$  (500 MHz;  $\text{DMSO-d}_6$ ;  $\text{Me}_4\text{Si}$ ) of MIL-1 after volatility test

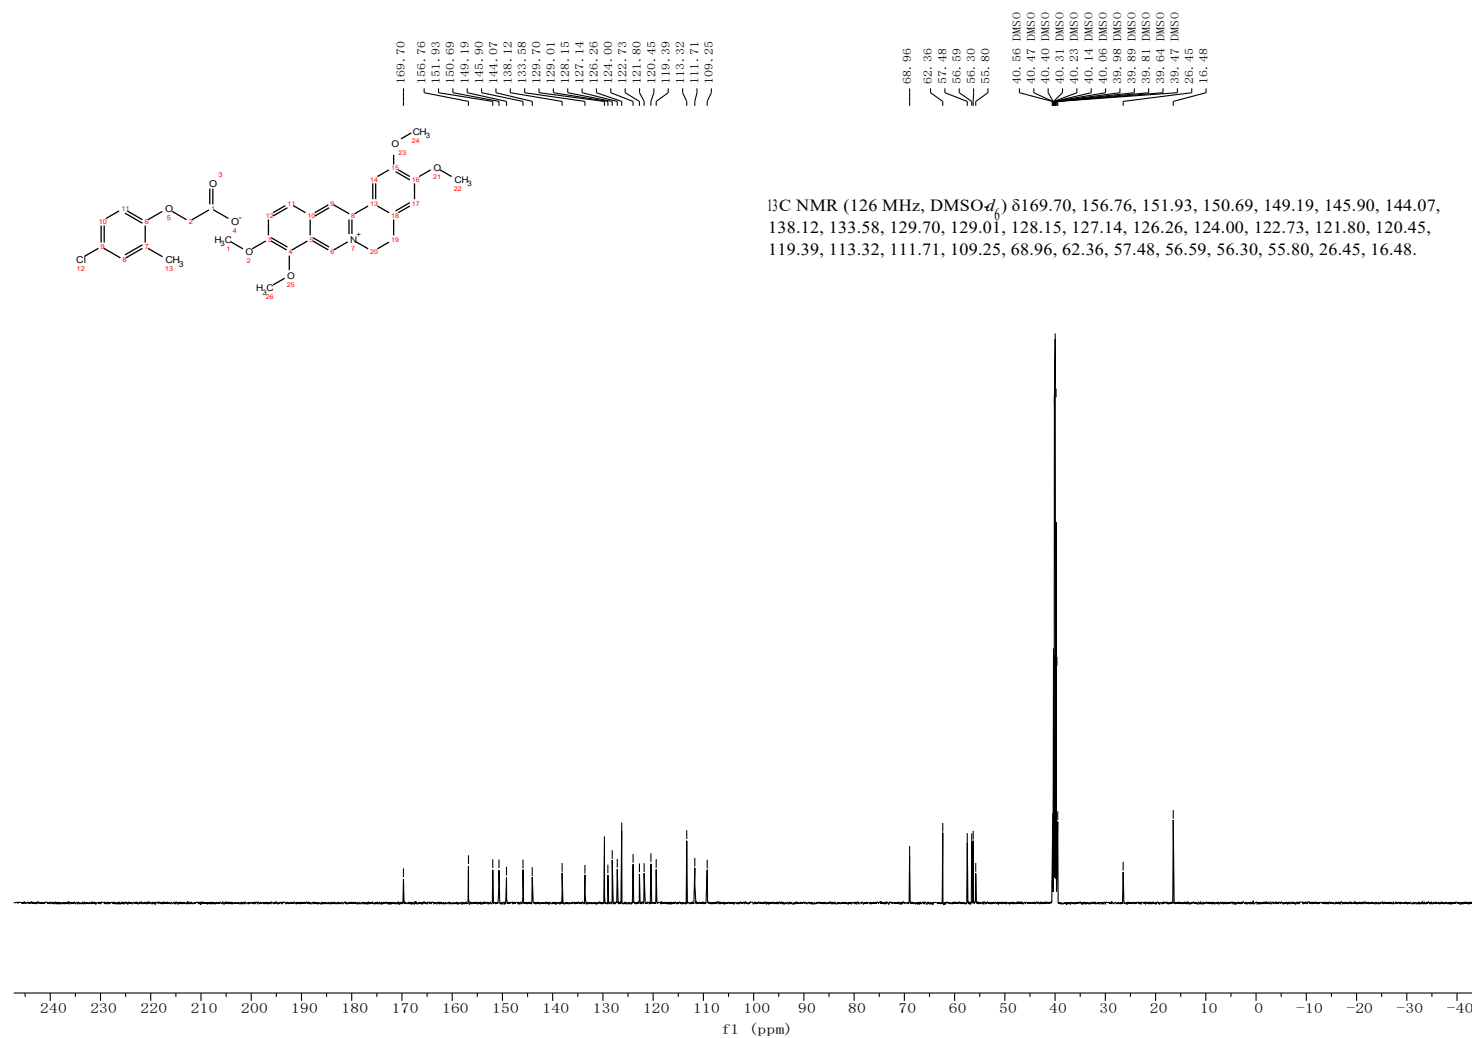

Fig. S28  $^{13}\text{C}$  NMR (126 MHz;  $\text{DMSO-}d_6$ ;  $\text{Me}_4\text{Si}$ ) of MIL-1 (2-(4-chloro-2-methylphenoxy)acetate 2,3,9,10-tetramethoxy-5,6-dihydroisoquinolino[3,2-a]isoquinolin-7-ium)



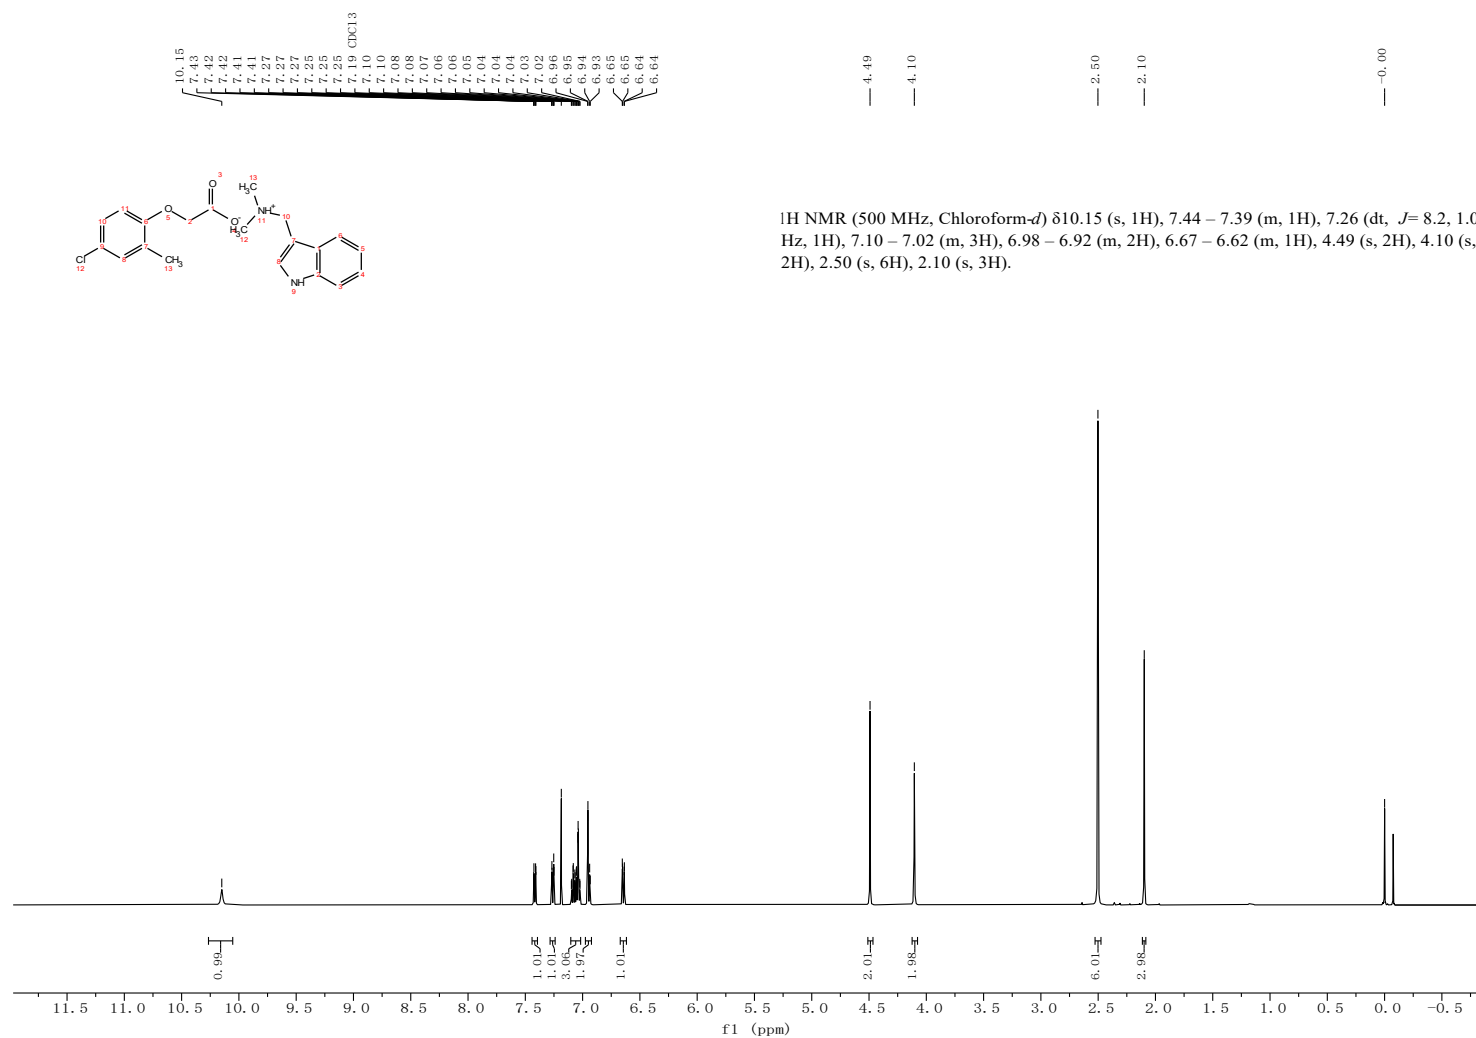

Fig. S29  $^1\text{H}$  NMR (500 MHz;  $\text{CDCl}_3$ ; Me $_4\text{Si}$ ) of MIL-2 (2-(4-chloro-2-methylphenoxy)acetate 1-(1H-indol-3-yl)-N,N-dimethylmethanaminium)

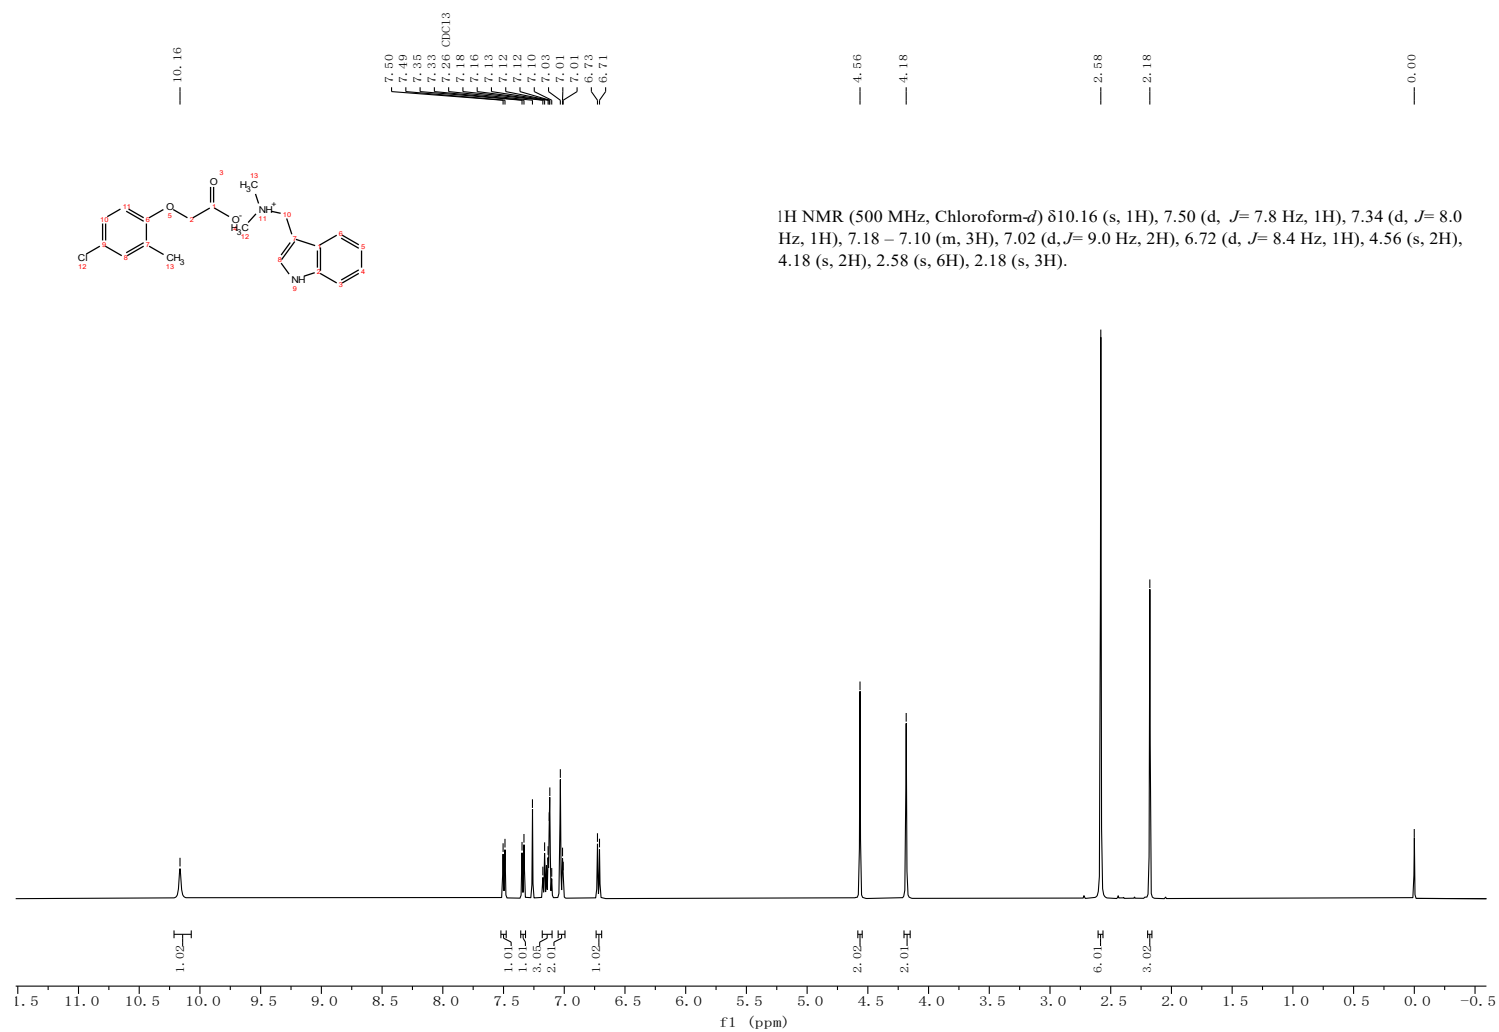

$^1\text{H}$  NMR (500 MHz, Chloroform-*d*)  $\delta$  10.16 (s, 1H), 7.50 (d,  $J=7.8$  Hz, 1H), 7.34 (d,  $J=8.0$  Hz, 1H), 7.18 – 7.10 (m, 3H), 7.02 (d,  $J=9.0$  Hz, 2H), 6.72 (d,  $J=8.4$  Hz, 1H), 4.56 (s, 2H), 4.18 (s, 2H), 2.58 (s, 6H), 2.18 (s, 3H).

Fig. S30  $^1\text{H}$  NMR (500 MHz;  $\text{CDCl}_3$ ;  $\text{Me}_4\text{Si}$ ) of MIL-2 after volatility test

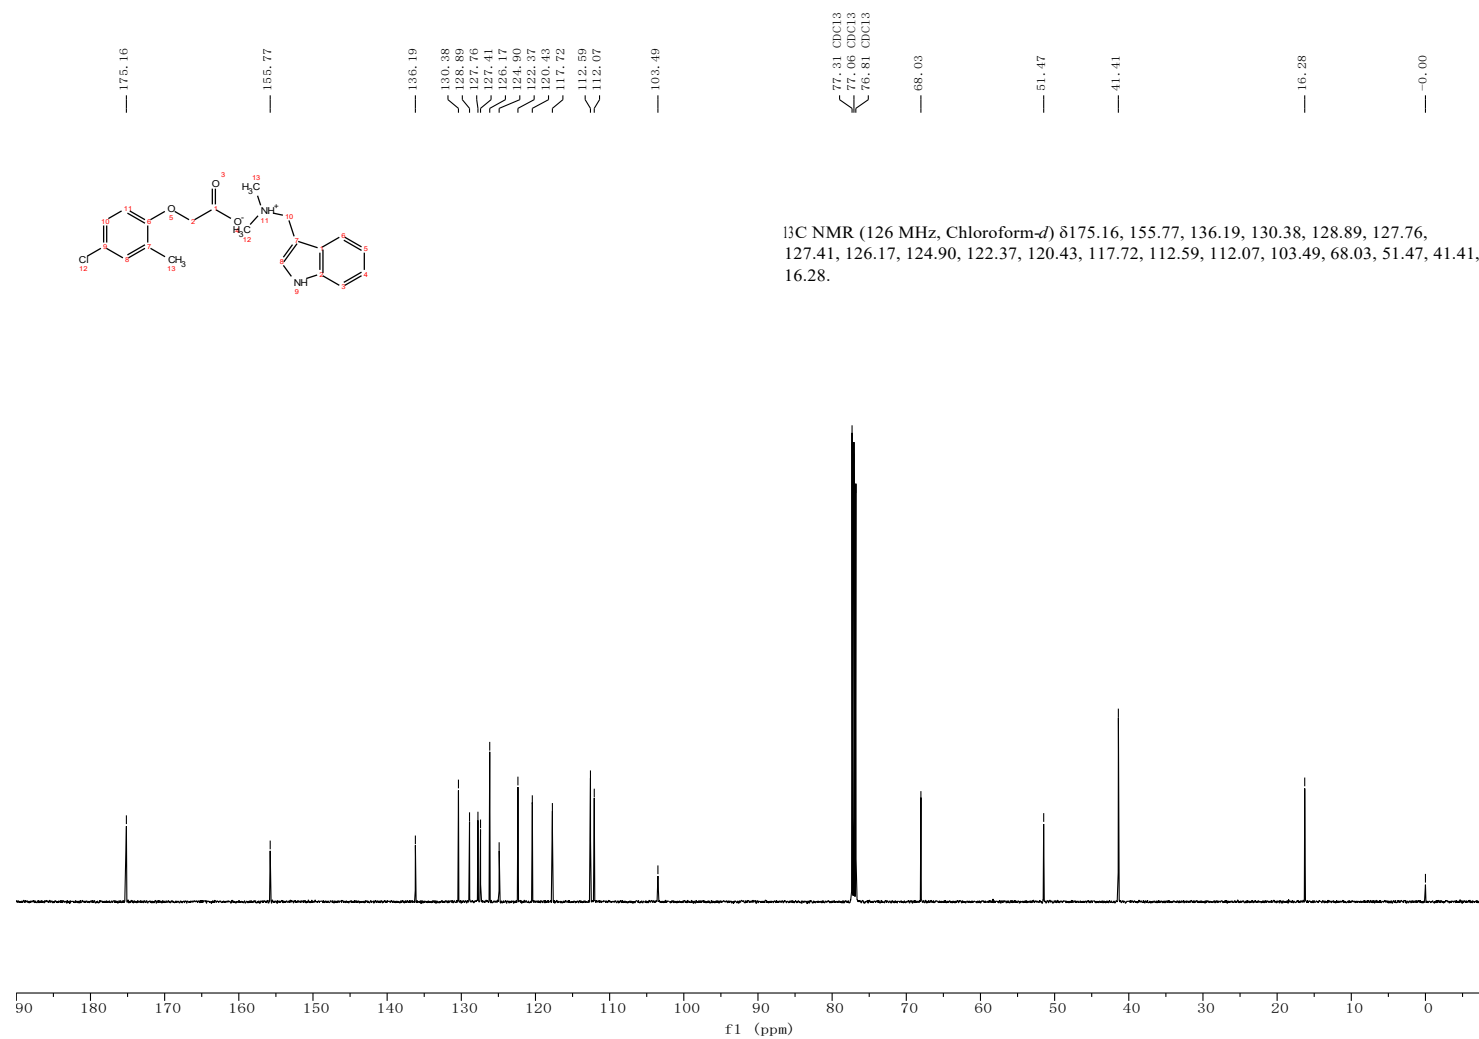

Fig. S31 <sup>13</sup>C NMR (126 MHz; CDCl<sub>3</sub>; Me<sub>4</sub>Si) of MIL-2 (2-(4-chloro-2-methylphenoxy)acetate 1-(1H-indol-3-yl)-N,N-dimethylmethanaminium)

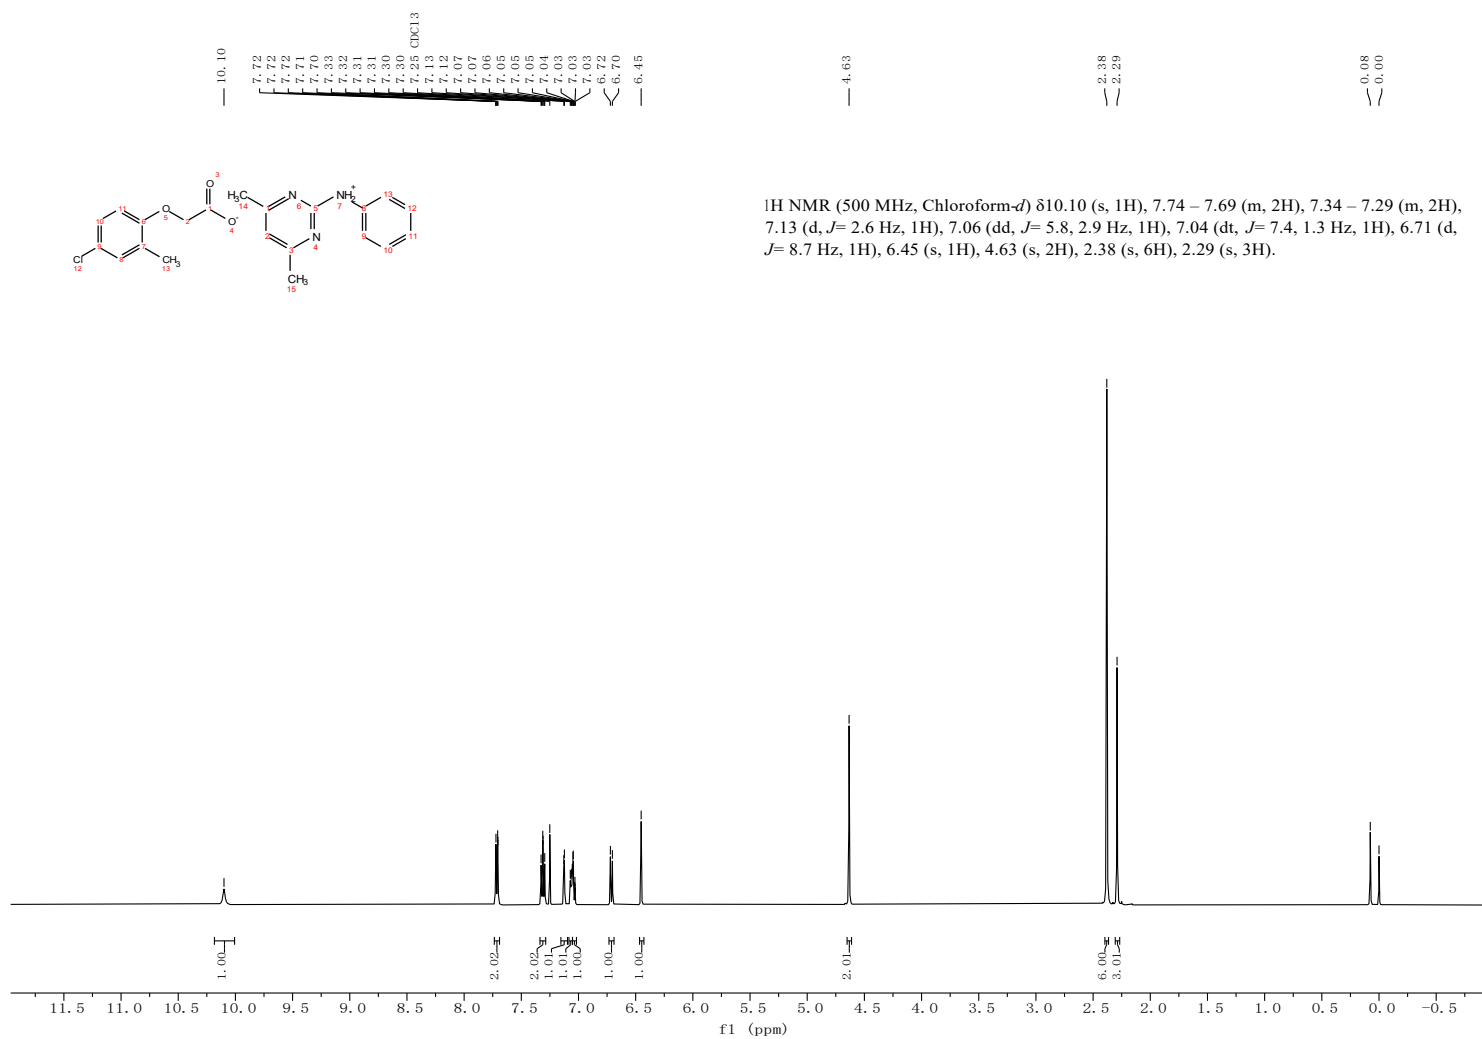

Fig. S32 <sup>1</sup>H NMR (500 MHz; CDCl<sub>3</sub>; Me<sub>4</sub>Si) of MIL-3 (2-(4-chlorophenoxy)acetate 4,6-dimethyl-N-phenylpyrimidin-2-aminium)

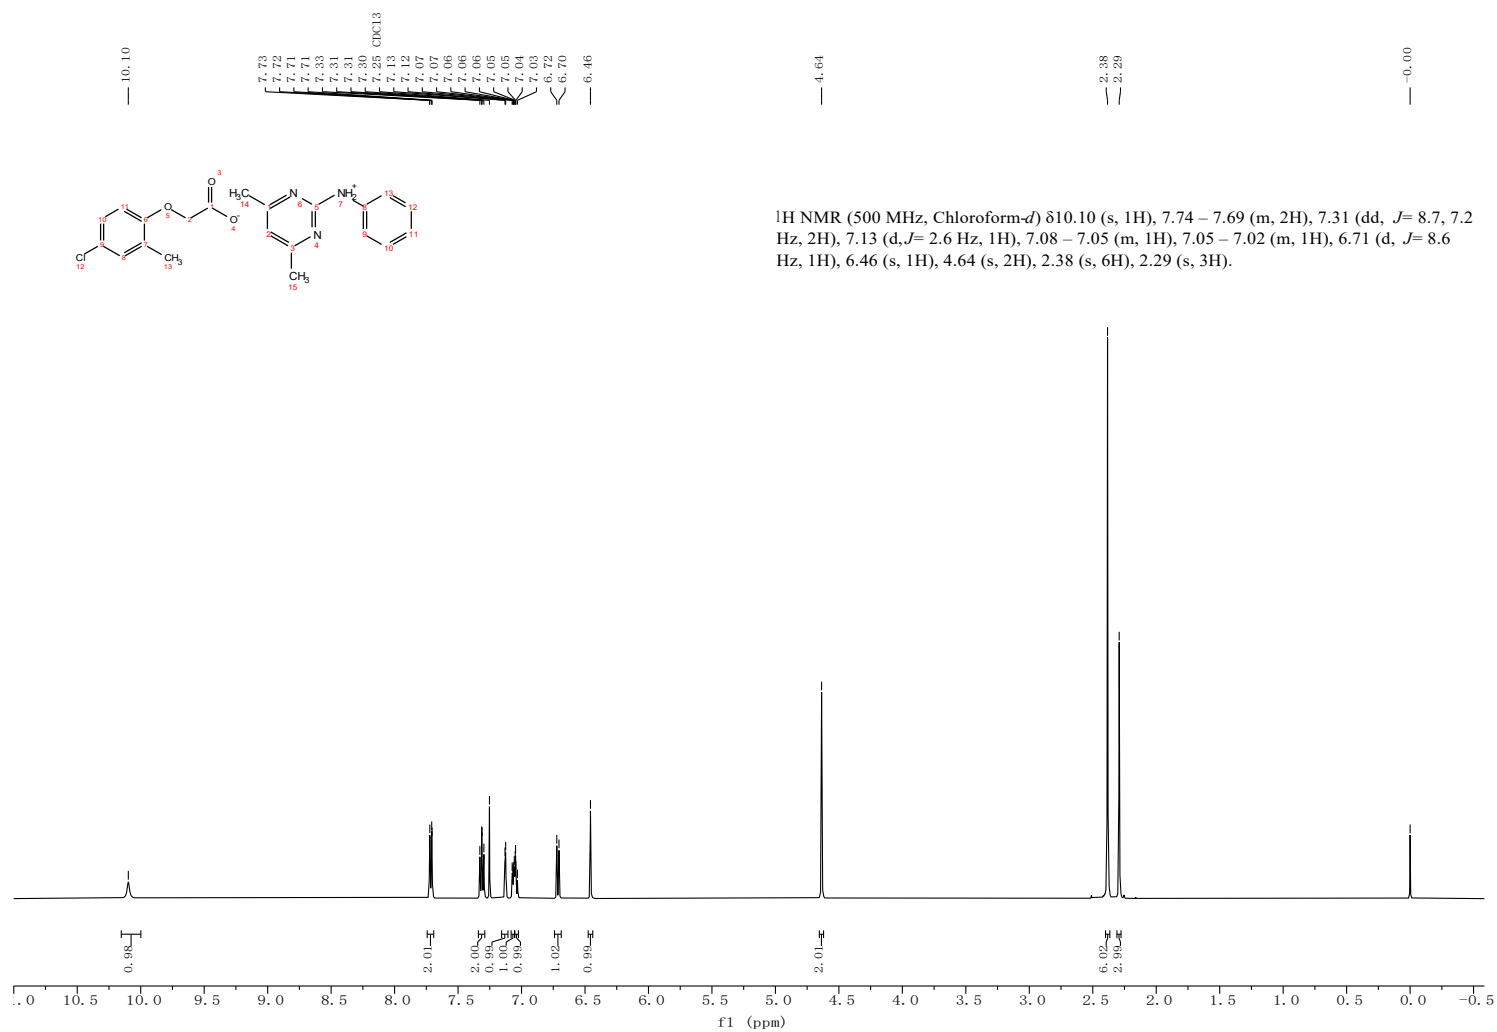

Fig. S33 <sup>1</sup>H NMR (500 MHz; CDCl<sub>3</sub>; Me<sub>4</sub>Si) of MIL-3 after volatility test

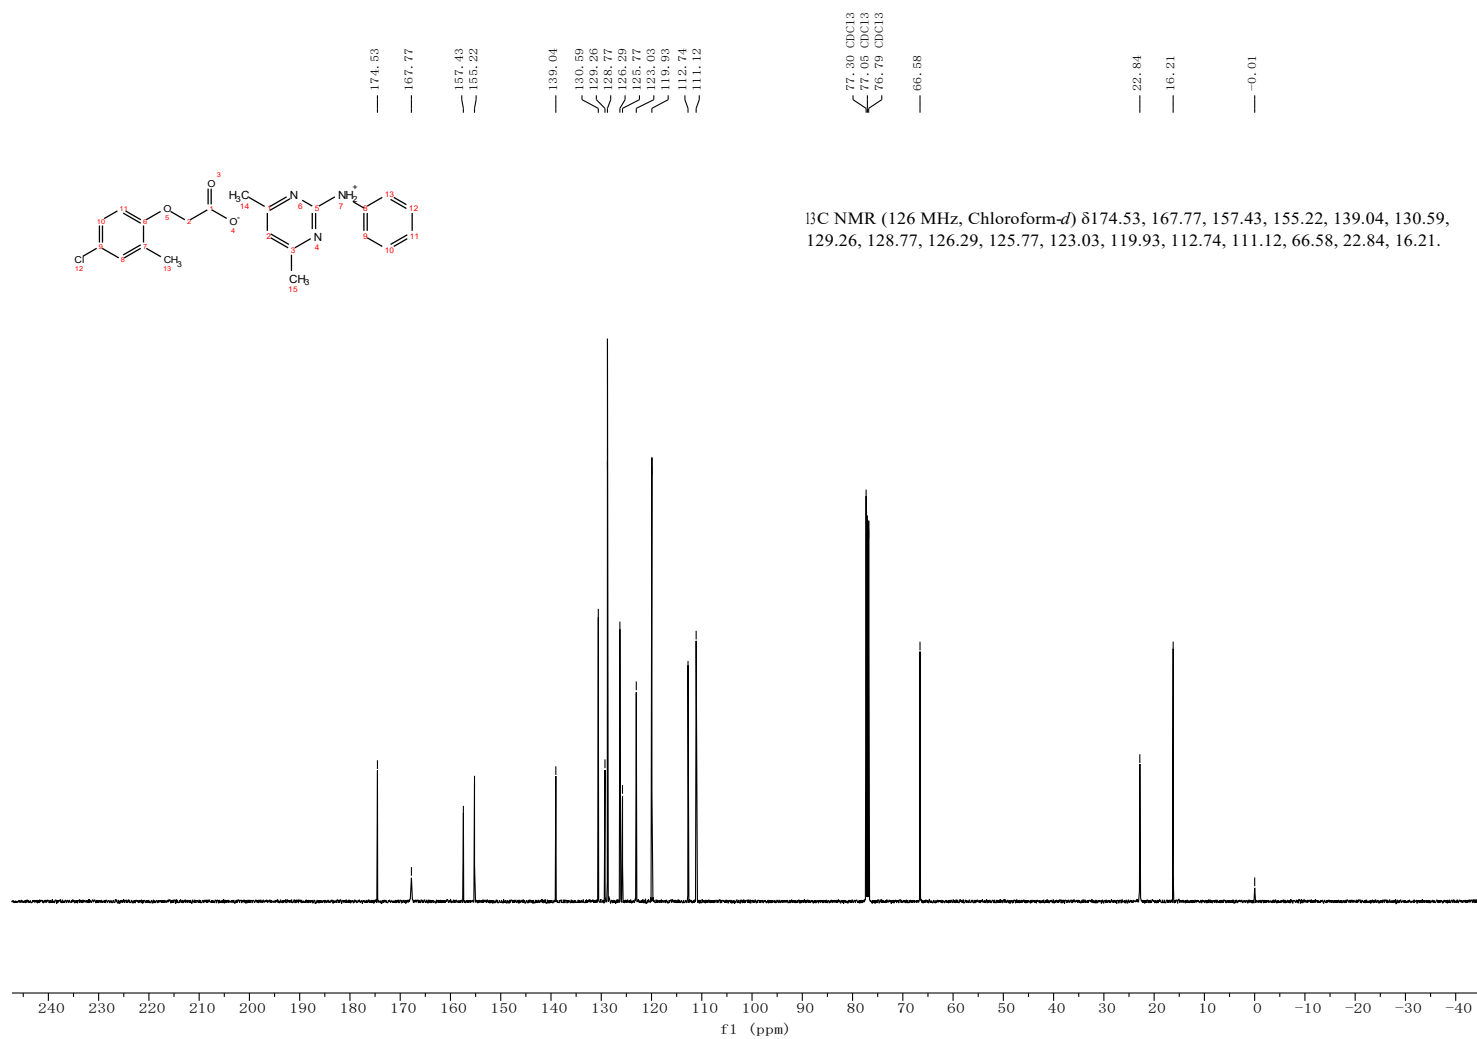

Fig. S34  $^{13}\text{C}$  NMR (126 MHz;  $\text{CDCl}_3$ ;  $\text{Me}_4\text{Si}$ ) of MIL-3 (2-(4-chlorophenoxy)acetate 4,6-dimethyl-N-phenylpyrimidin-2-aminium)

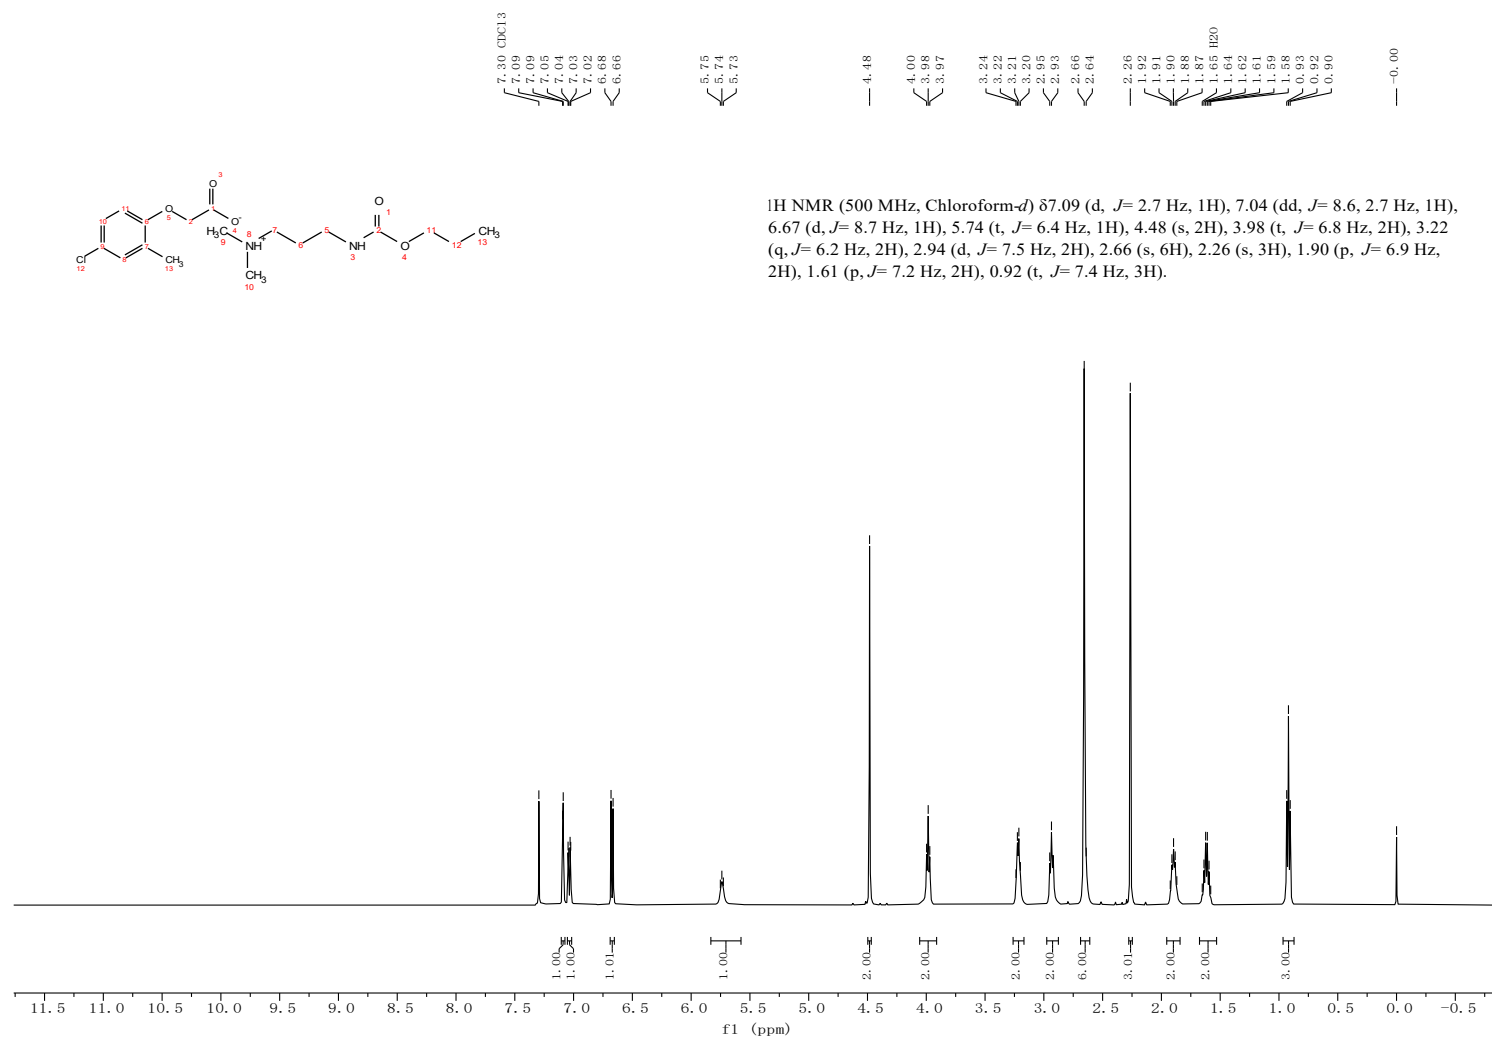

Fig. S35 <sup>1</sup>H NMR (500 MHz; CDCl<sub>3</sub>; Me<sub>4</sub>Si) of MIL-4 (2-(4-chloro-2-methylphenoxy)acetate N,N-dimethyl-3-((propoxycarbonyl)amino)propan-1-aminium)

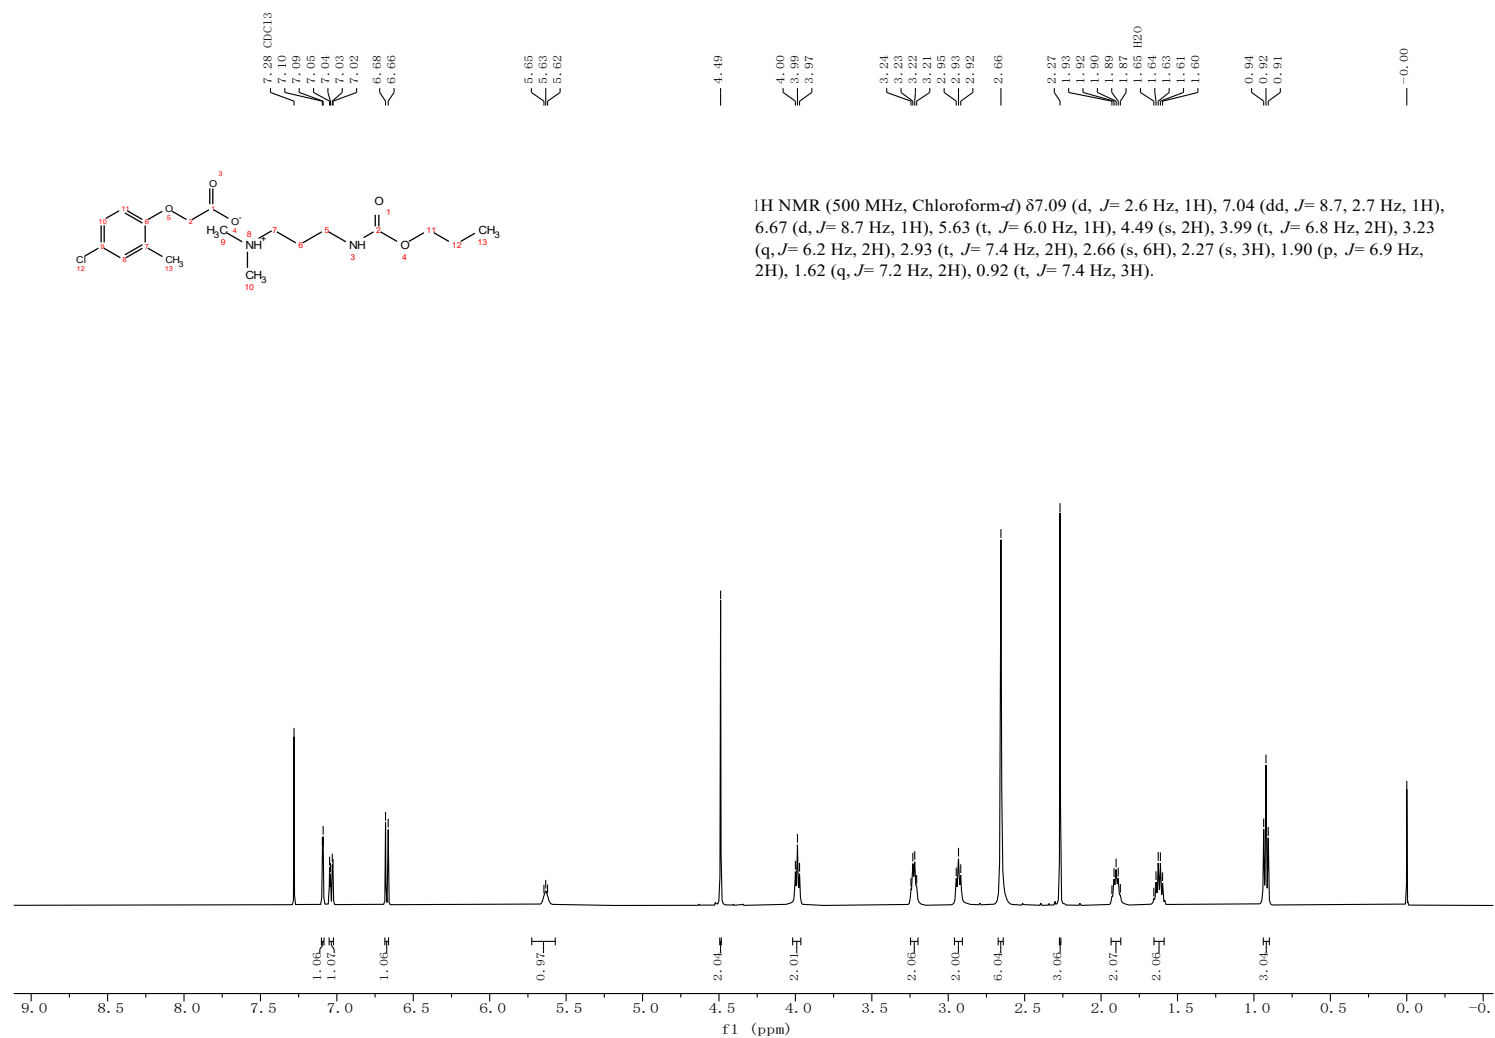

Fig. S36 <sup>1</sup>H NMR (500 MHz; CDCl<sub>3</sub>; Me<sub>4</sub>Si) of MIL-4 after volatility test



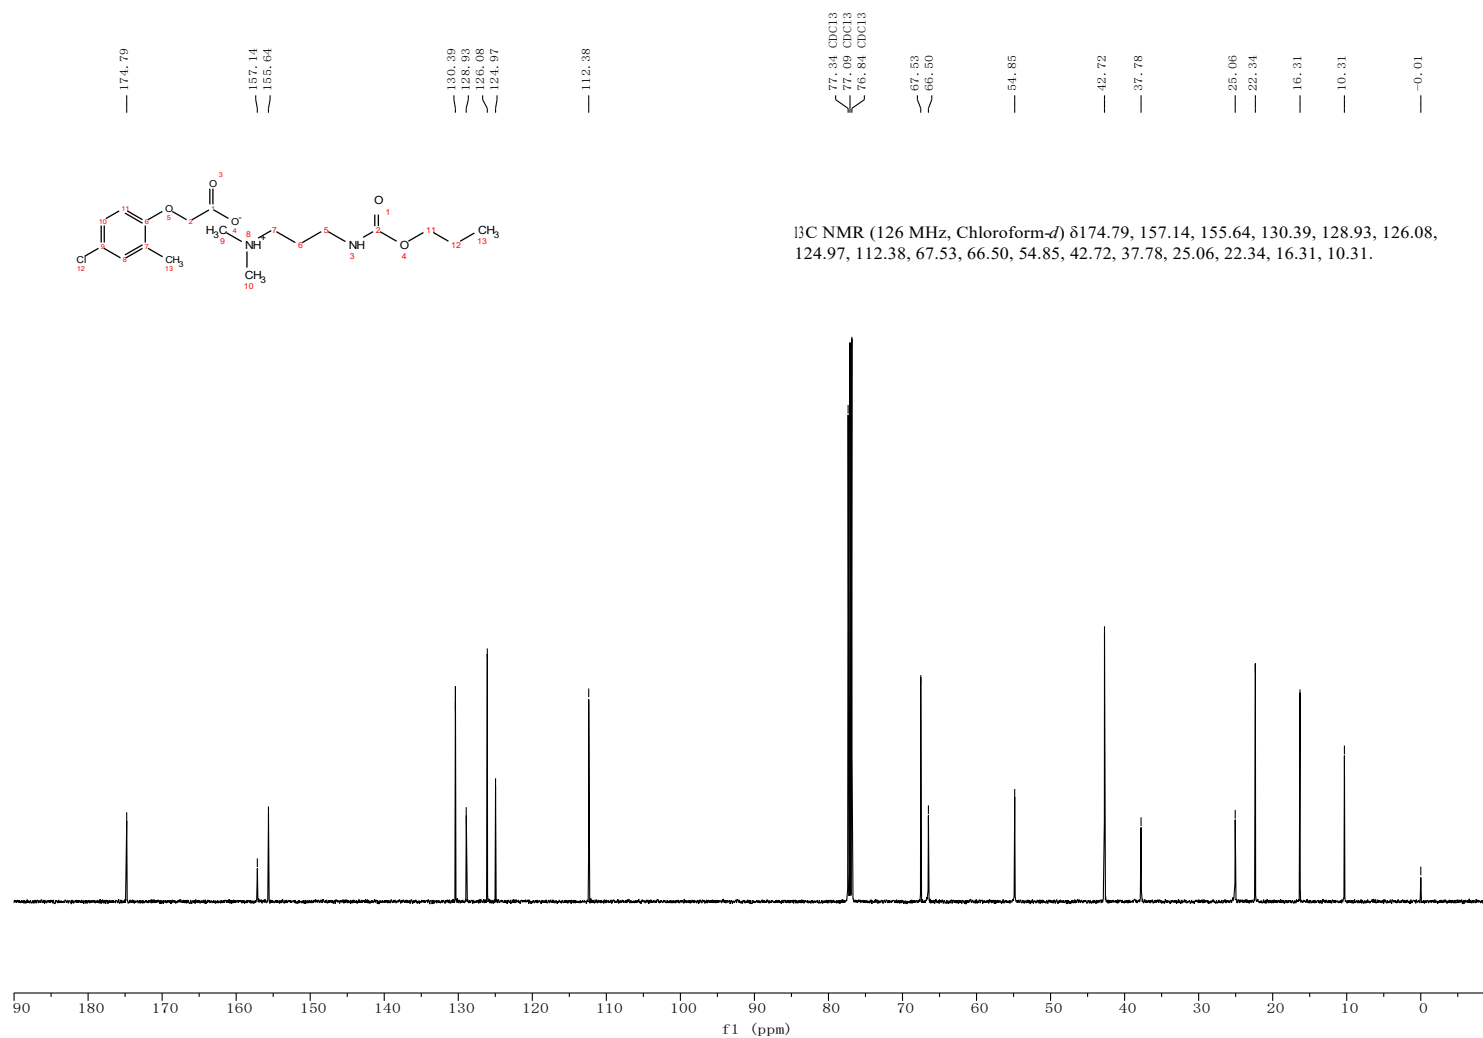

Fig. S37 <sup>13</sup>C NMR (126 MHz; CDCl<sub>3</sub>; Me<sub>4</sub>Si) of MIL-4 (2-(4-chloro-2-methylphenoxy)acetate N,N-dimethyl-3-((propoxycarbonyl)amino)propan-1-aminium)

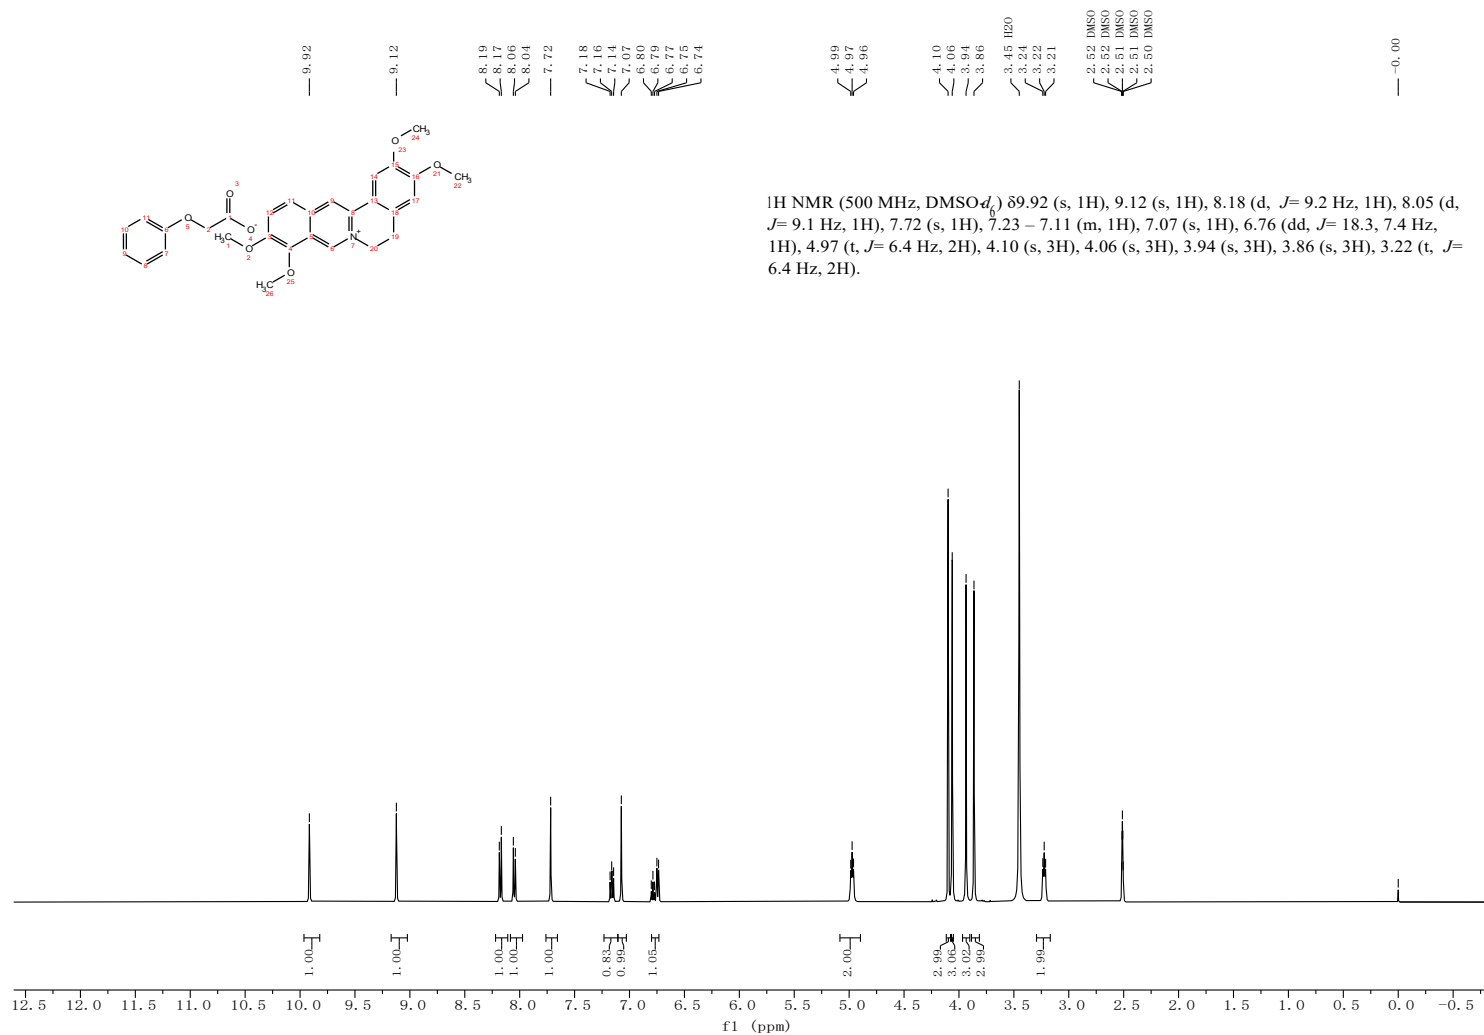

Fig. S38 <sup>1</sup>H NMR (500 MHz; DMSO-*d*<sub>6</sub>; Me<sub>4</sub>Si) of PIL-1 (2-phenoxyacetate 2,3,9,10-tetramethoxy-5,6-dihydroisoquinolino[3,2-a]isoquinolin-7-ium)

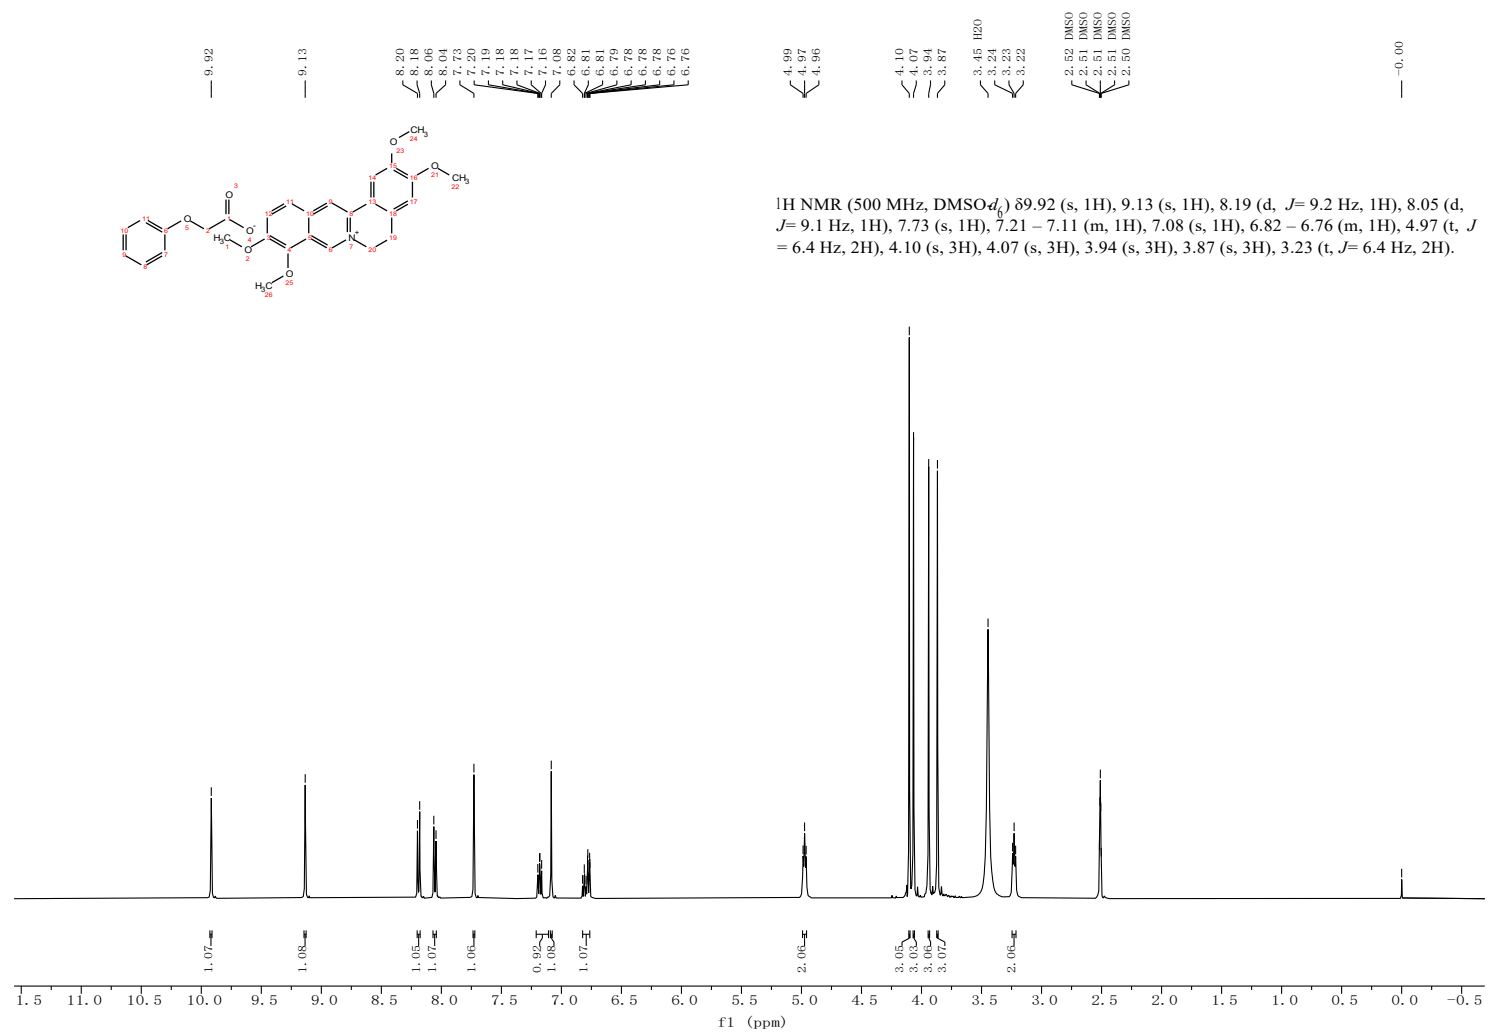

Fig. S39 <sup>1</sup>H NMR (500 MHz; DMSO-d<sub>6</sub>; Me<sub>4</sub>Si) of PIL-1 after volatility test

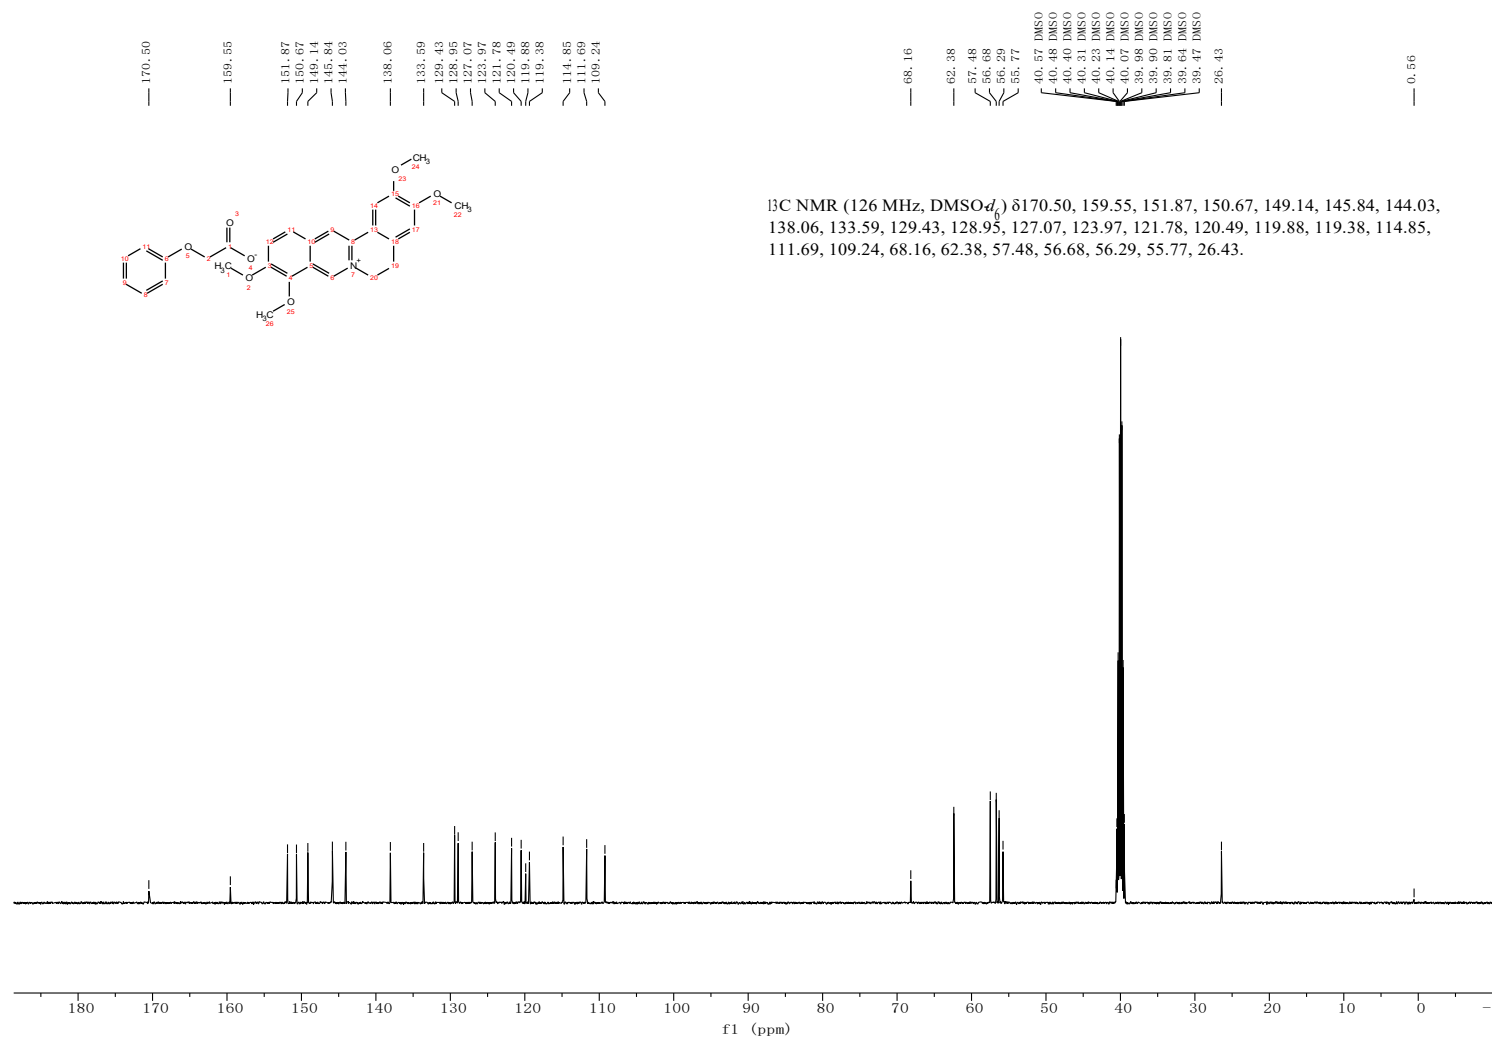

Fig. S40  $^{13}\text{C}$  NMR (126 MHz;  $\text{DMSO-d}_6$ ;  $\text{Me}_4\text{Si}$ ) of PIL-1 (2-phenoxyacetate 2,3,9,10-tetramethoxy-5,6-dihydroisoquinolino[3,2-a]isoquinolin-7-ium)

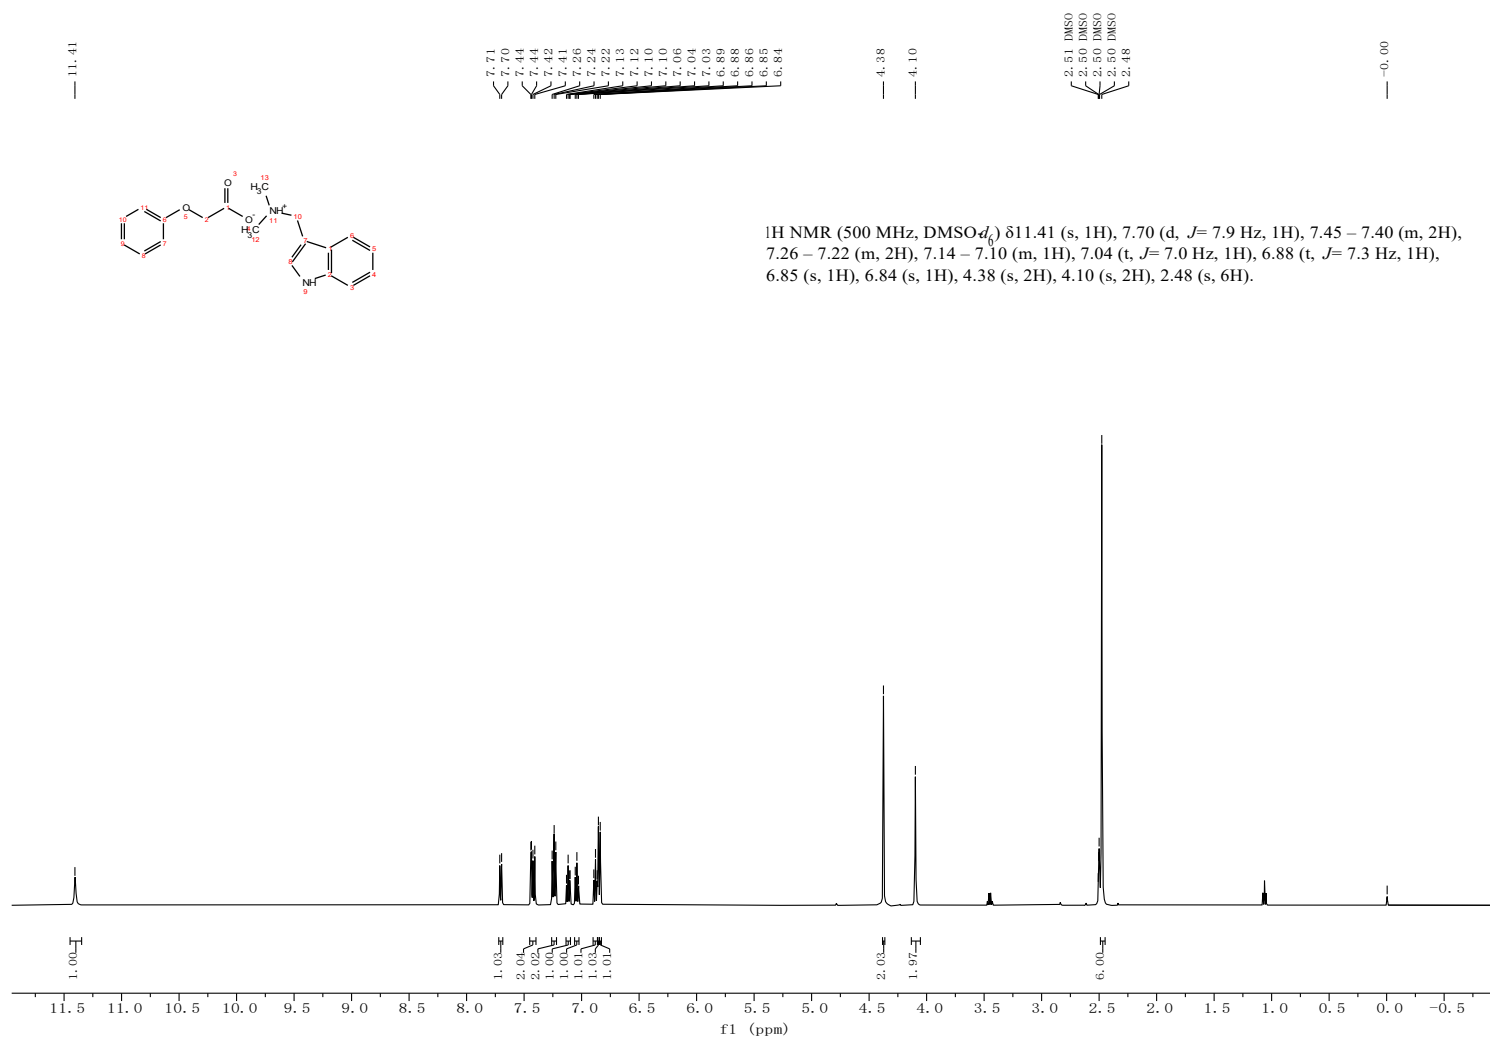

Fig. S41 <sup>1</sup>H NMR (500 MHz; DMSO-*d*<sub>6</sub>; Me<sub>4</sub>Si) of PIL-2 (2-phenoxyacetate 4,6-dimethyl-N-phenylpyrimidin-2-aminium)

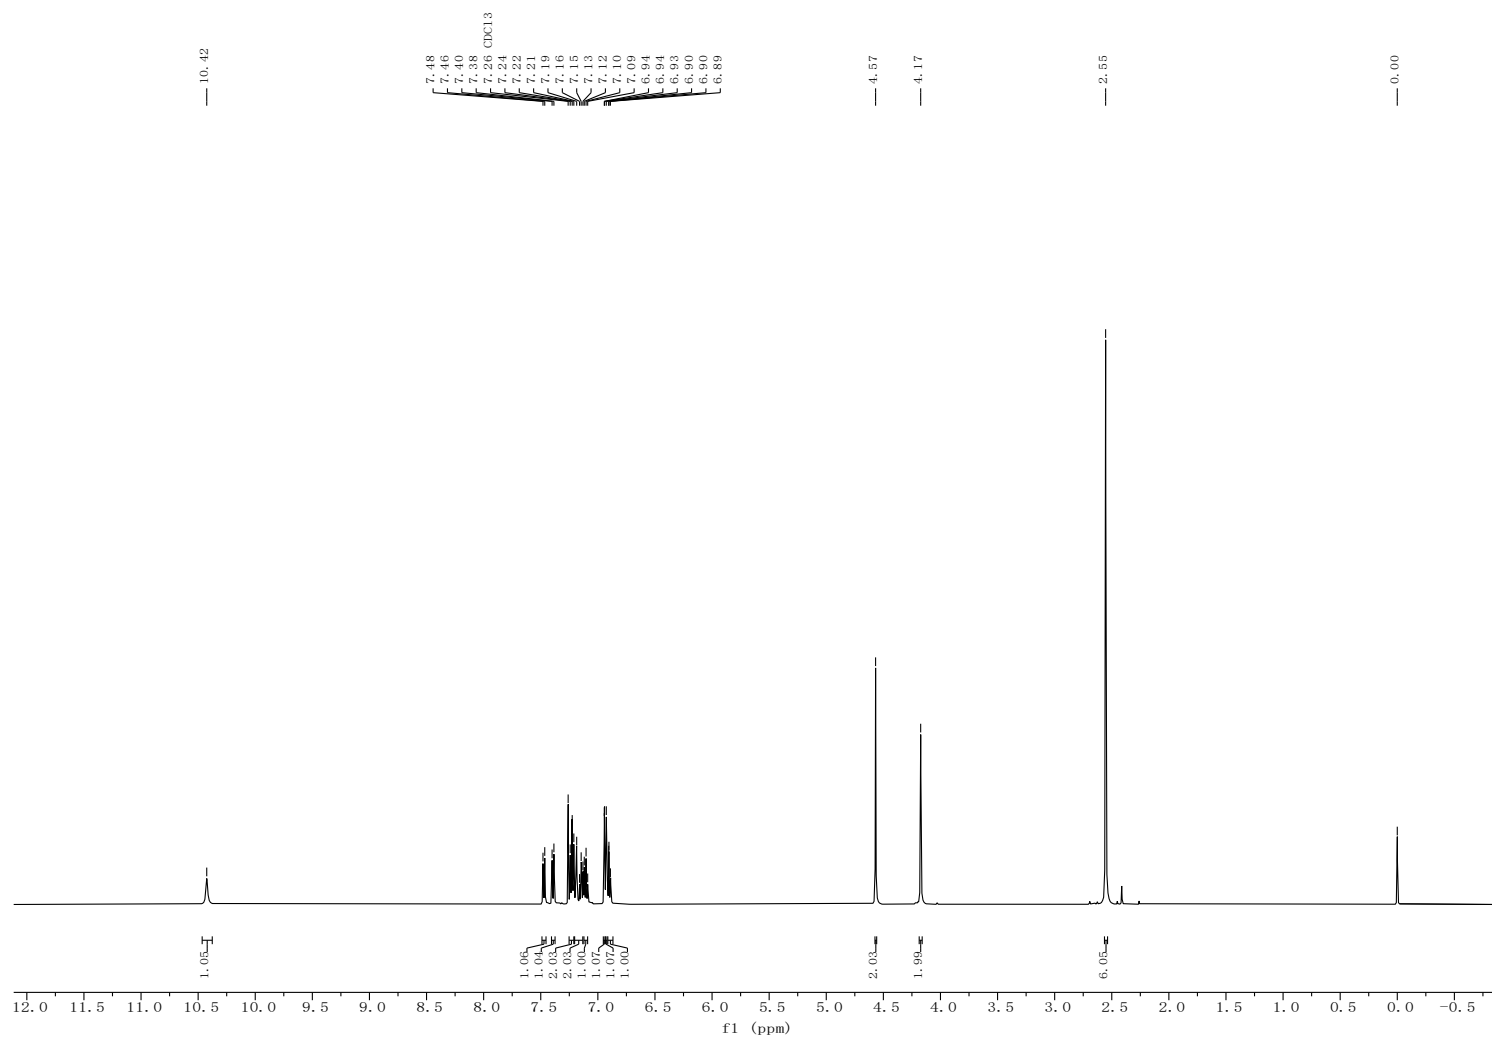

Fig. S42 <sup>1</sup>H NMR (500 MHz; CDCl<sub>3</sub>; Me<sub>4</sub>Si) of PIL-2 after volatility test

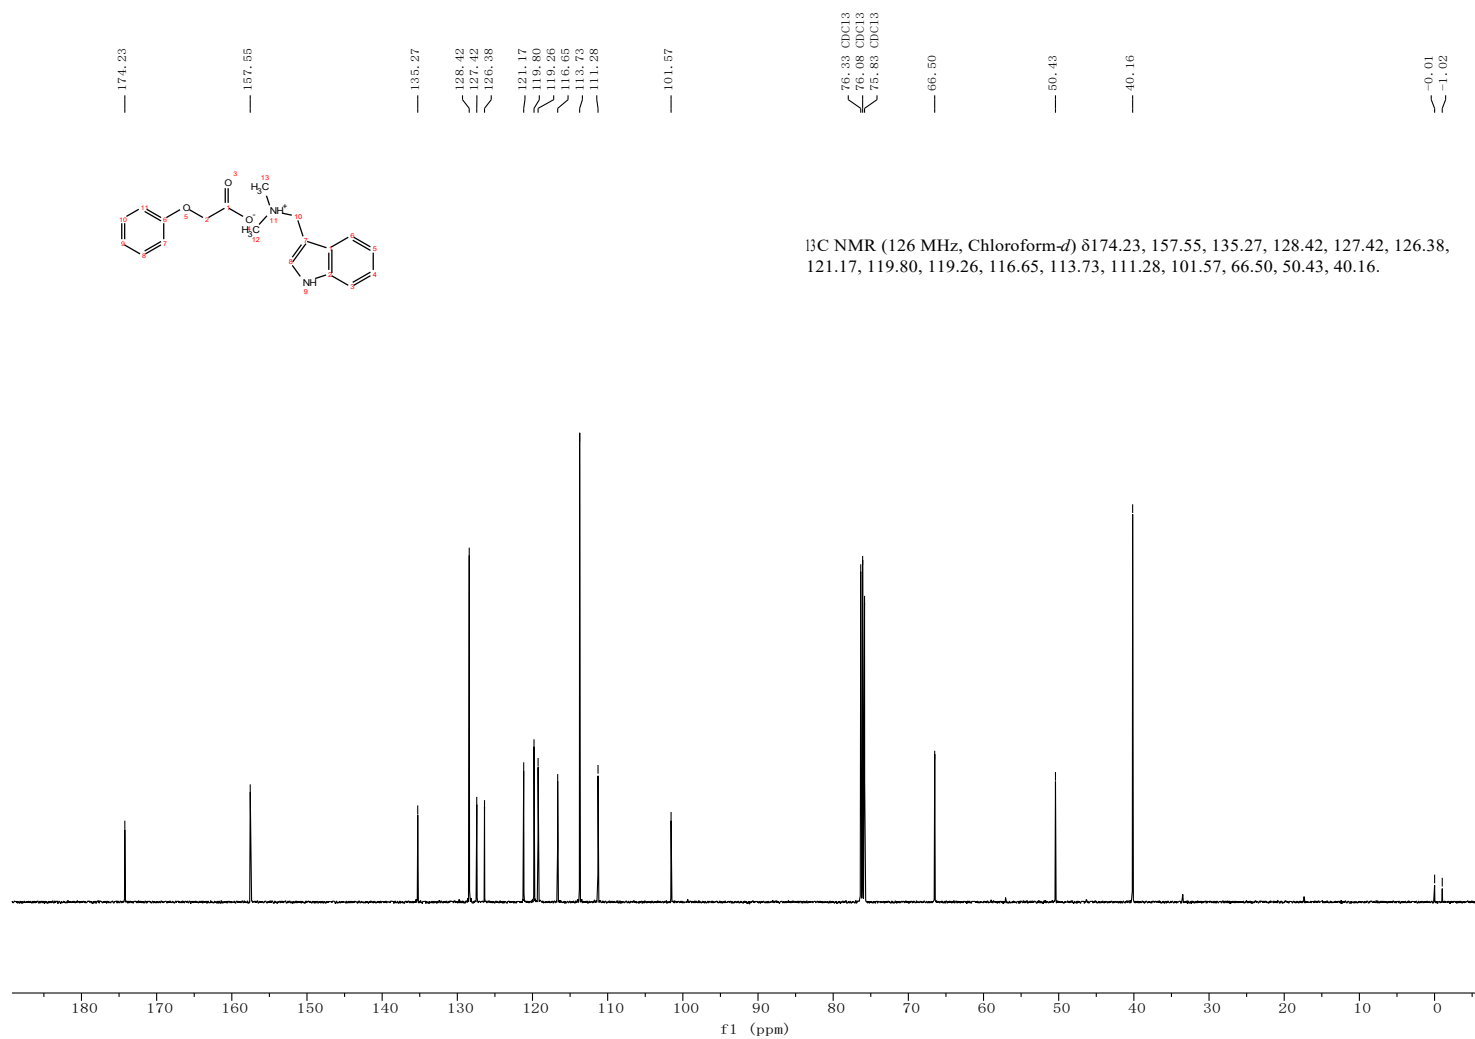

Fig. S43 <sup>13</sup>C NMR (126 MHz; CDCl<sub>3</sub>; Me<sub>4</sub>Si) of PIL-2 (2-phenoxyacetate 1-(1H-indol-3-yl)-N,N-dimethylmethanaminium)

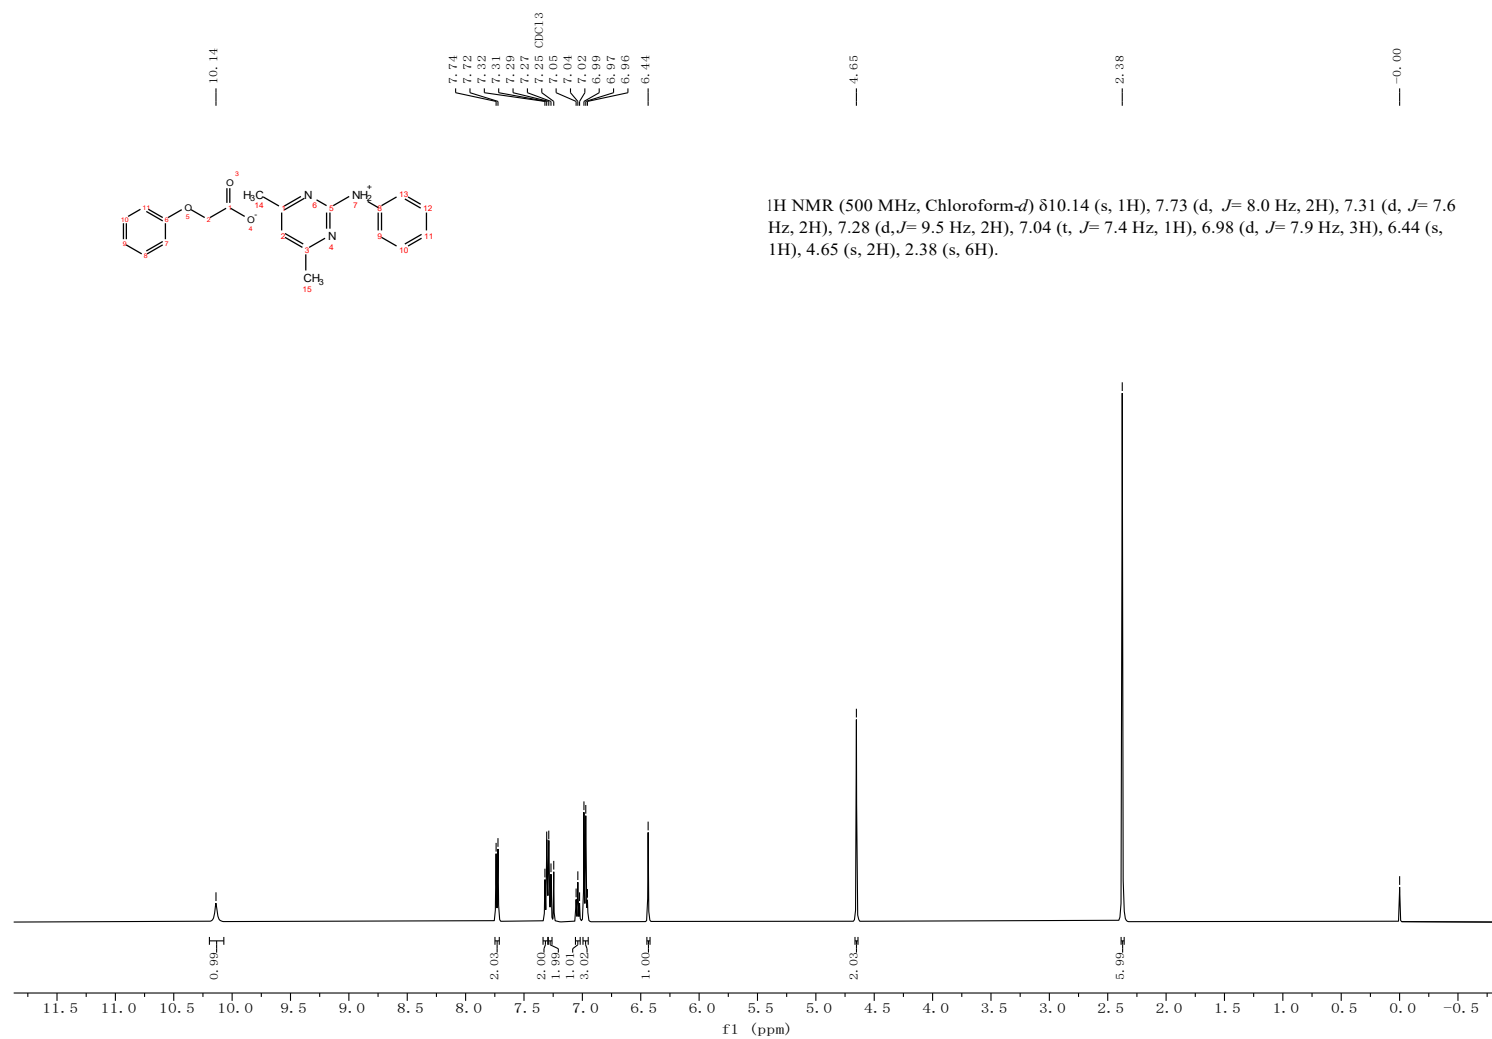

Fig. S44 <sup>1</sup>H NMR (500 MHz; CDCl<sub>3</sub>; Me<sub>4</sub>Si) of PIL-3 (2-phenoxyacetate 4,6-dimethyl-N-phenylpyrimidin-2-aminium)



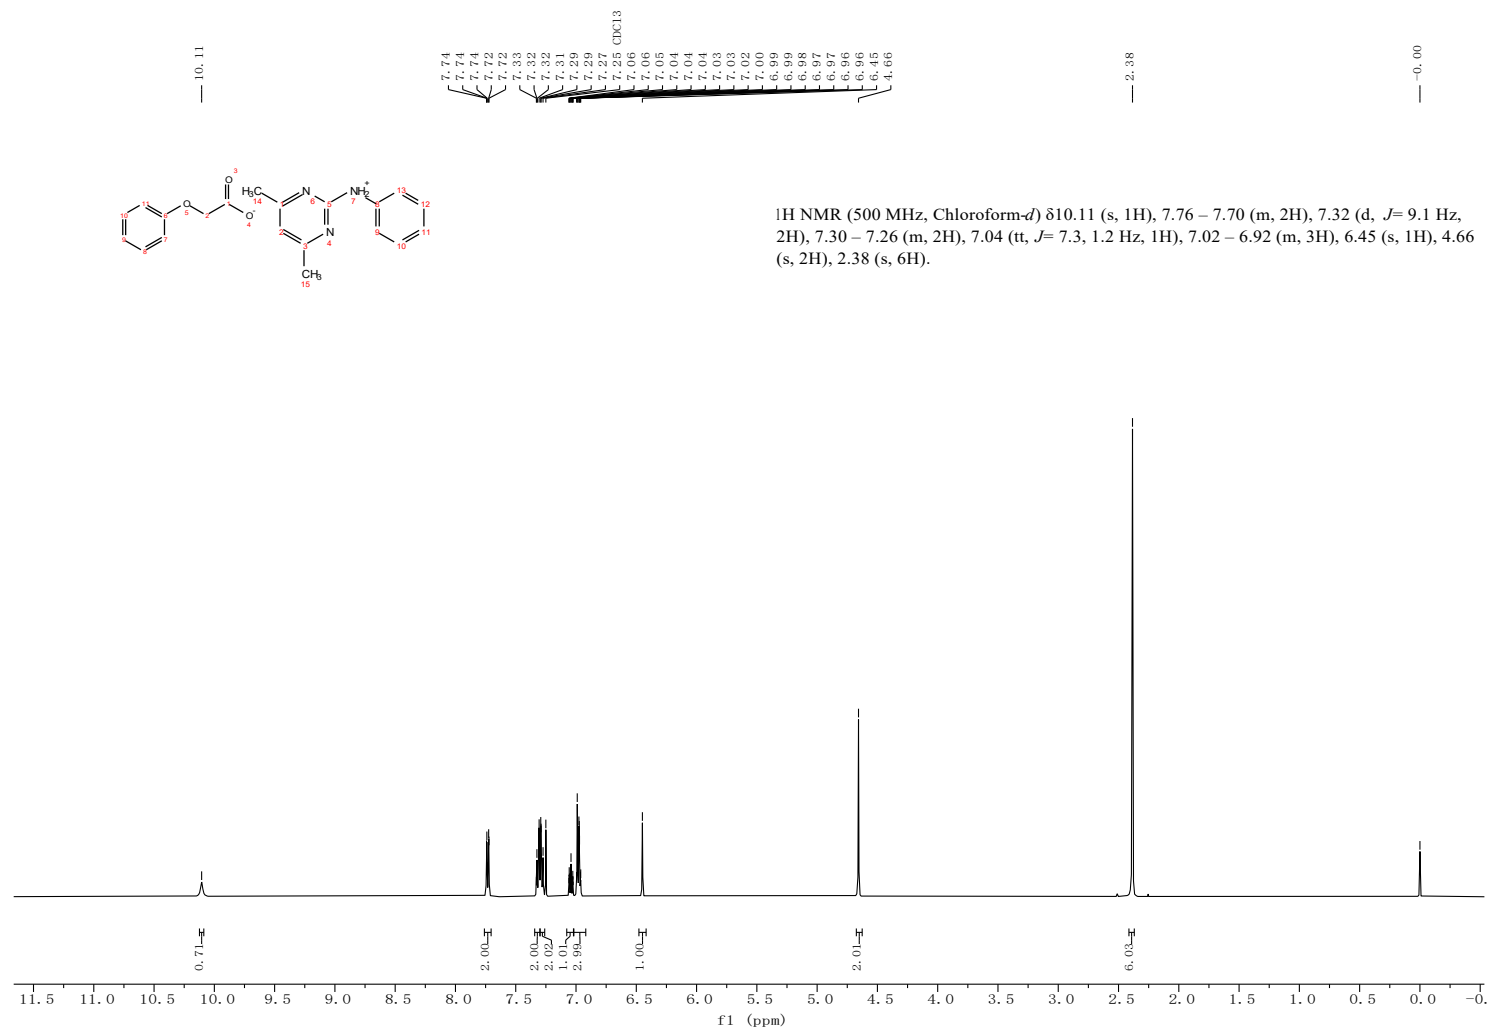

Fig. S45 <sup>1</sup>H NMR (500 MHz; CDCl<sub>3</sub>; Me<sub>4</sub>Si) of PIL-3 after volatility test

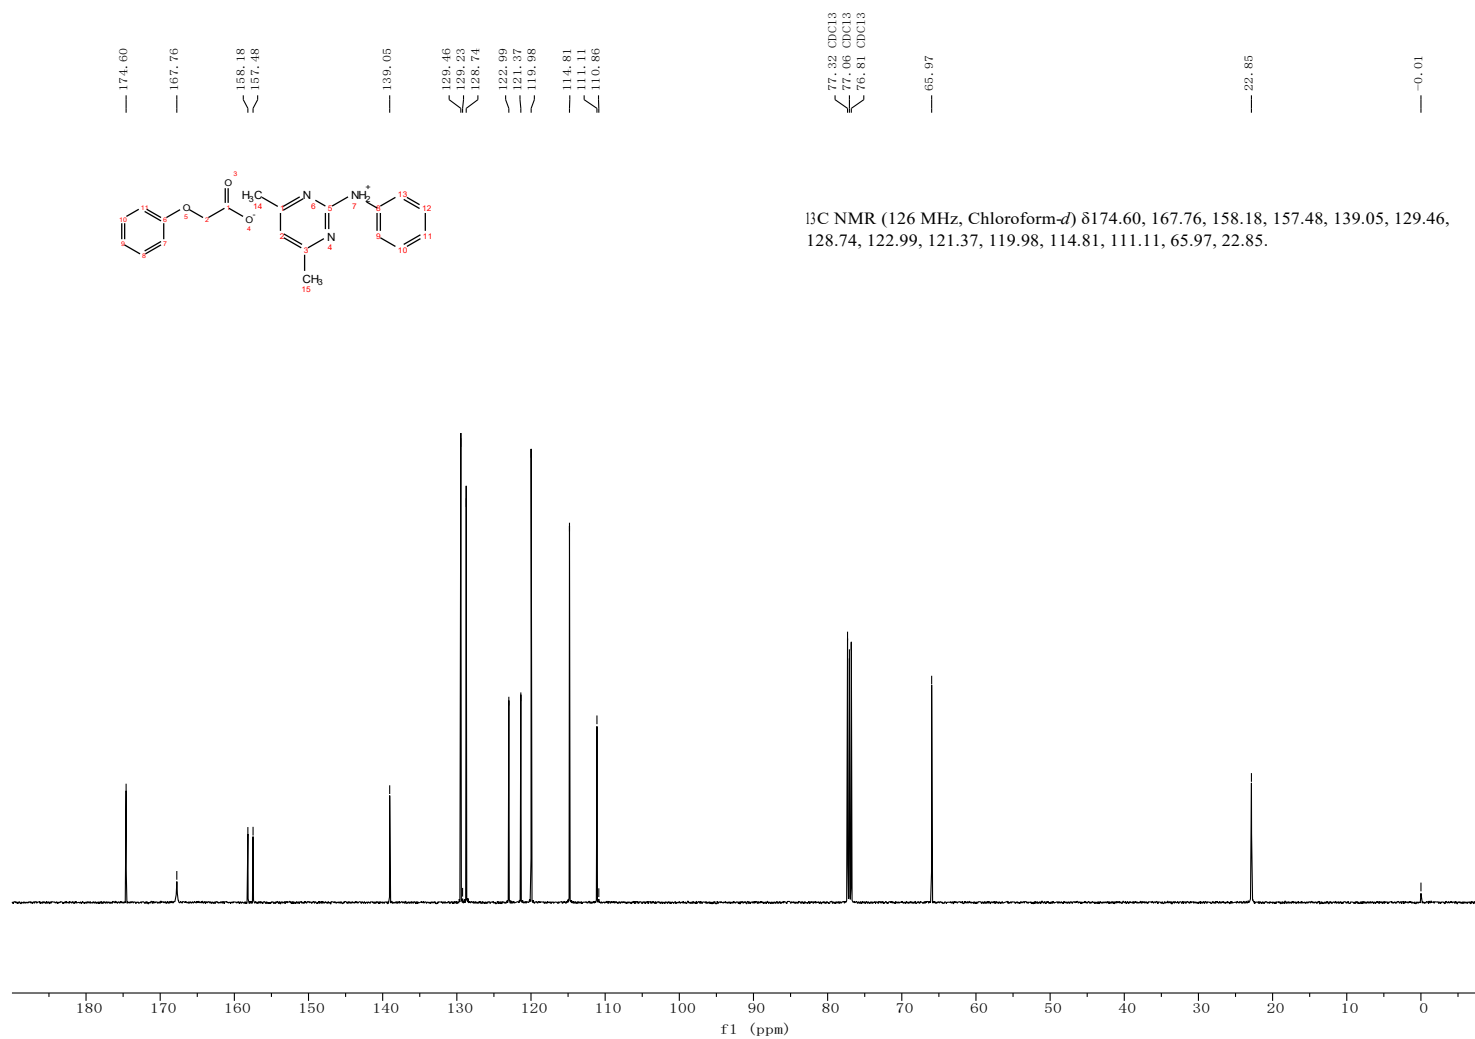

Fig. S46 <sup>13</sup>C NMR (126 MHz; CDCl<sub>3</sub>; Me<sub>4</sub>Si) of PIL-3 (2-phenoxyacetate 4,6-dimethyl-N-phenylpyrimidin-2-aminium)

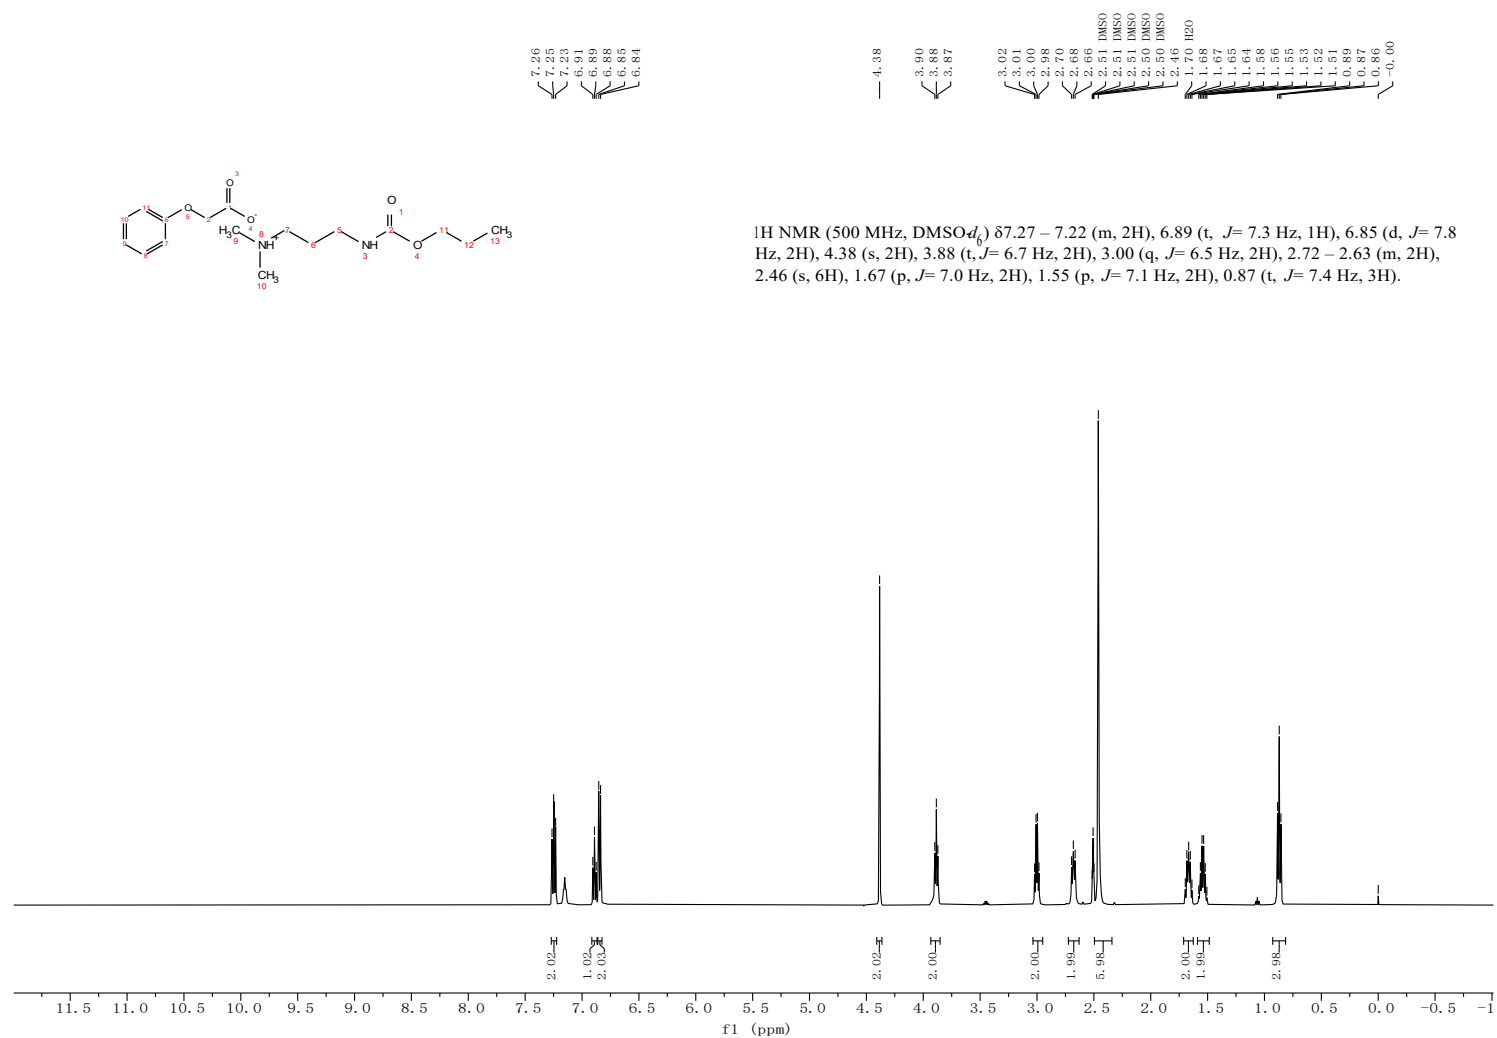

Fig. S47 <sup>1</sup>H NMR (500 MHz; DMSO-d<sub>6</sub>; Me4Si) of PIL-4 (2-phenoxyacetate N,N-dimethyl-3-((propoxycarbonyl)amino)propan-1-aminium)

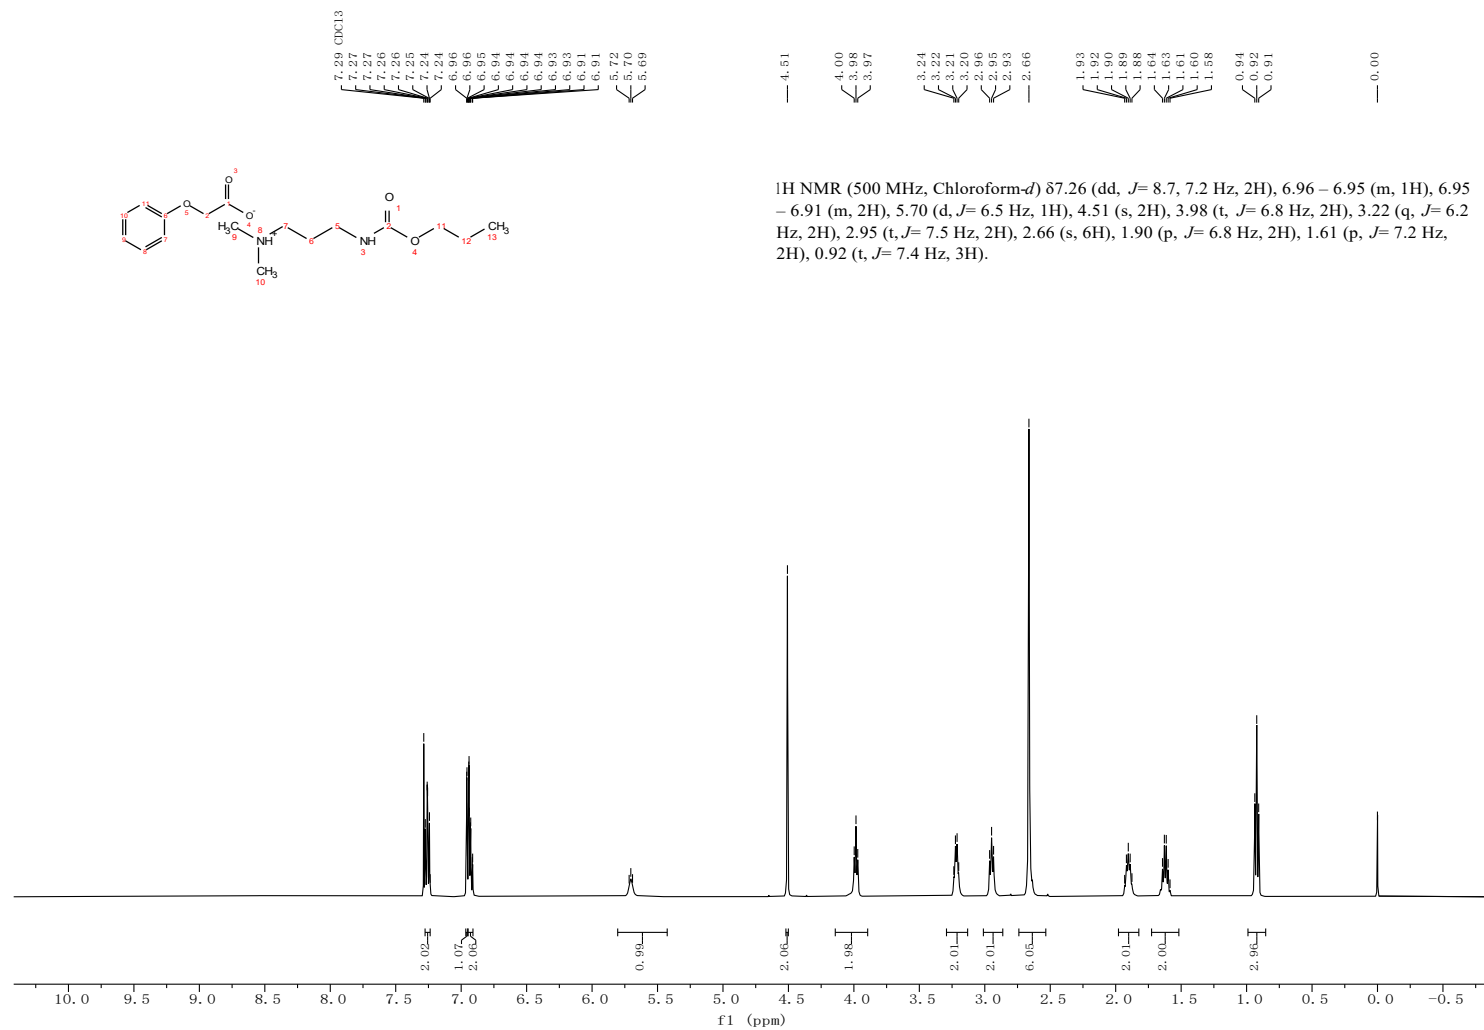

Fig. S48 <sup>1</sup>H NMR (500 MHz; CDCl<sub>3</sub>; Me<sub>4</sub>Si) of PIL-4 after volatility test

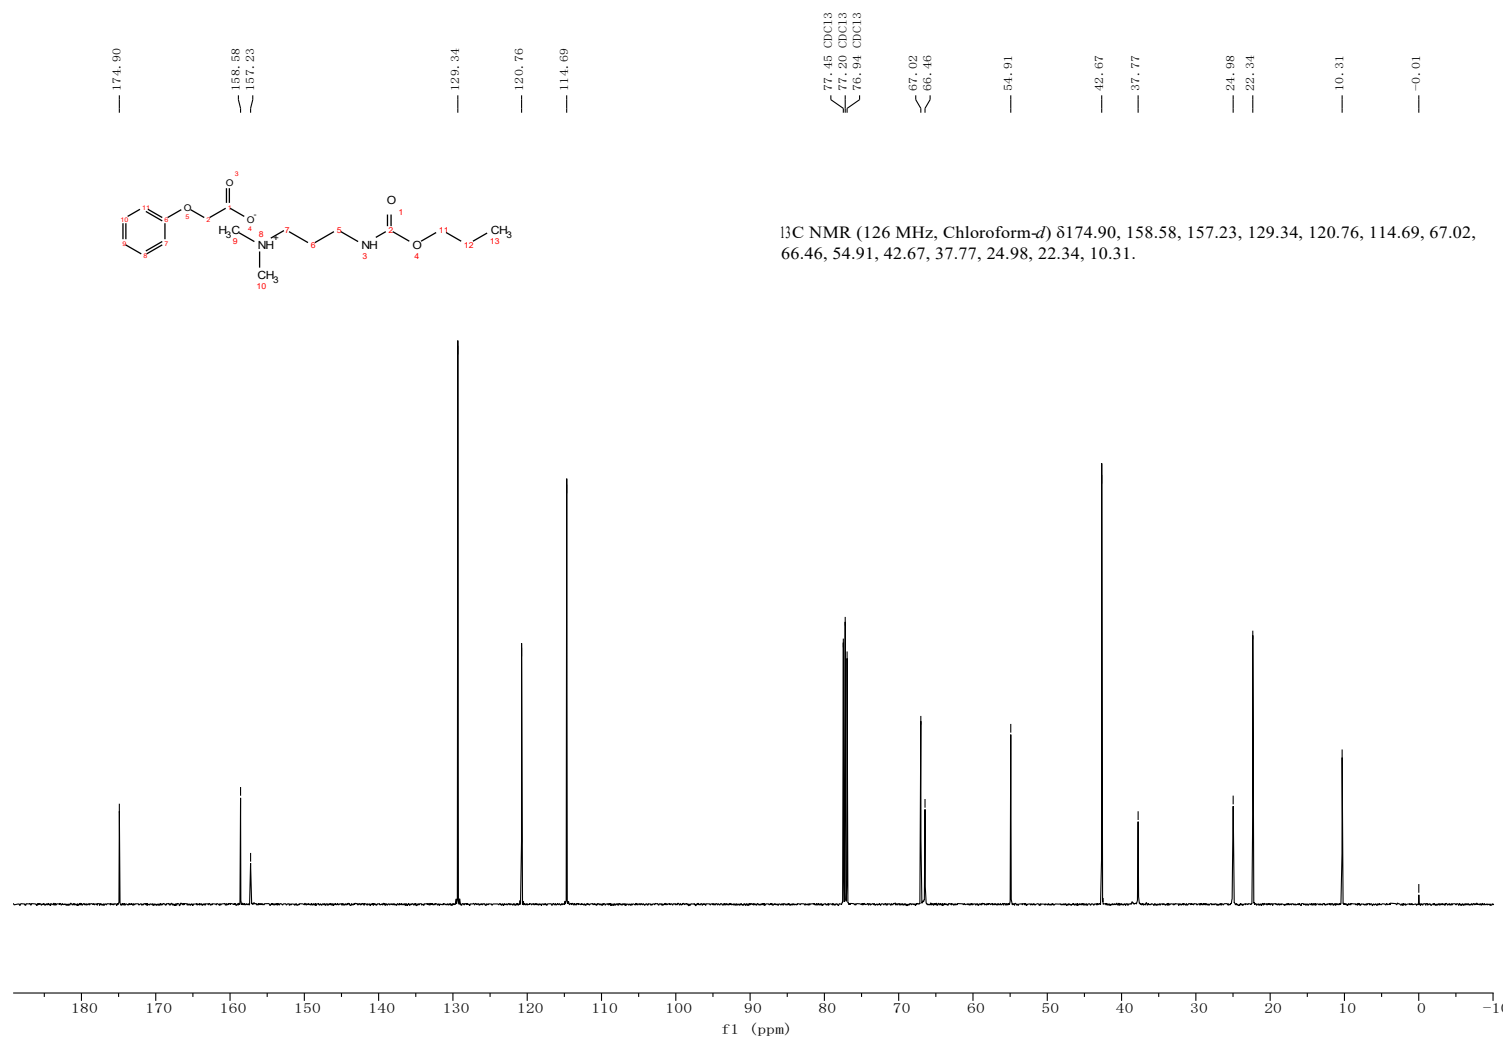

Fig. S49 <sup>13</sup>C NMR (126 MHz; CDCl<sub>3</sub>; Me<sub>4</sub>Si) of PIL-4 (2-phenoxyacetate N,N-dimethyl-3-((propoxycarbonyl)amino)propan-1-aminium)
